# Supplementary material for: Synthesis and structure–activity relationships for cytotoxicity and apoptosis-inducing activity of (+)-halichonine B
Source: Royal Society of Chemistry journal article supplement (doi:10.1039/c5ob01488c), 2015-01-01
Supplement: c5ob01488c1.pdf [file c5ob01488c1.pdf]

### *Supporting Information*

Synthesis and structure–activity relationships for cytotoxicity and apoptosis-inducing activity of (+)-halichonine B

Ichiro Hayakawa,<sup>\*a</sup> Tomomi Nakamura,<sup>b</sup> Osamu Ohno,<sup>c</sup> Kiyotake Suenaga<sup>d</sup> and Hideo Kigoshi<sup>\*b</sup>

<sup>a</sup> Division of Applied Chemistry, Graduate School of Natural Science and Technology,  
Okayama University, 3-1-1 Tsushima-naka, Kita-ku, Okayama 700-8530, Japan  
E-mail: ichiro.hayakawa@okayama-u.ac.jp; Fax: +81-86-251-8215

<sup>b</sup> Department of Chemistry, Graduate School of Pure and Applied Sciences, University of Tsukuba  
1-1-1 Tennodai, Tsukuba 305-8571, Japan  
E-mail: kigoshi@chem.tsukuba.ac.jp; Fax: +81-29-853-4313

<sup>c</sup> Department of Chemistry and Life Science, School of Advanced Engineering, Kogakuin  
University, 2665-1 Nakano, Hachioji 192-0015, Japan

<sup>d</sup> Department of Chemistry, Faculty of Science and Technology, Keio University  
3-14-1 Hiyoshi, Yokohama 223-8522, Japan.

|                                                                                                                               |      |
|-------------------------------------------------------------------------------------------------------------------------------|------|
| Contents:                                                                                                                     | page |
| <b>Table S1</b> GI <sub>50</sub> values of halichonine B against 39 human cancer cell lines                                   | S2   |
| <b>Table S2</b> Results of COMPARE                                                                                            | S3   |
| <b>Figure S1</b> Relationship between the diamine chain length of halichonine B analogues and cytotoxicity against HL60 cells | S4   |
| Experimental protocols, characterization data of artificial analogues                                                         | S5   |
| <sup>1</sup> H and <sup>13</sup> C NMR spectra of newly synthesized compounds                                                 | S14  |

**Table S1** GI<sub>50</sub> values of halichonine B (**2**) against 39 human cancer cell lines

| Type of cancer      | Cell line  | GI <sub>50</sub> <sup>a,b</sup> (μM) |                        |
|---------------------|------------|--------------------------------------|------------------------|
|                     |            | halichonine B free amine             | halichonine B HCl salt |
| Breast              | HBC-4      | 2.0                                  | 1.7                    |
|                     | BSY-1      | 2.0                                  | 1.6                    |
|                     | HBC-5      | 2.9                                  | 1.9                    |
|                     | MCF-7      | 3.4                                  | 1.9                    |
|                     | MDA-MB-231 | 12                                   | 1.8                    |
| Central nervous     | U251       | 3.6                                  | 1.7                    |
|                     | SF-268     | 13                                   | 1.7                    |
|                     | SF-295     | 8.8                                  | 1.8                    |
|                     | SF-539     | 2.0                                  | 1.9                    |
|                     | SNB-75     | 16                                   | 1.9                    |
| Colon               | SNB-78     | 17                                   | 1.8                    |
|                     | HCC2998    | 1.7                                  | 1.2                    |
|                     | KM-12      | 7.3                                  | 1.9                    |
|                     | HT-29      | 3.4                                  | 1.7                    |
|                     | HCT-15     | 11                                   | 1.8                    |
| Lung                | HCT-116    | 6.0                                  | 1.8                    |
|                     | NCI-H23    | 13                                   | 1.8                    |
|                     | NCI-H226   | 14                                   | 2.0                    |
|                     | NCI-H522   | 2.5                                  | 1.7                    |
|                     | NCI-H460   | 3.5                                  | 1.8                    |
| Melanoma            | A549       | 16                                   | 1.9                    |
|                     | DMS273     | 4.7                                  | 1.9                    |
|                     | DMS114     | 1.9                                  | 1.6                    |
|                     | LOX-IMVI   | 8.6                                  | 1.9                    |
| Ovary               | OVCAR-3    | 13                                   | 1.7                    |
|                     | OVCAR-4    | 11                                   | 1.8                    |
|                     | OVCAR-5    | 3.5                                  | 1.7                    |
|                     | OVCAR-8    | 11                                   | 2.0                    |
|                     | SK-OV-3    | 18                                   | 2.1                    |
| Kidney              | RXF-631L   | 13                                   | 1.8                    |
|                     | ACHN       | 17                                   | 1.8                    |
| Stomach             | St-4       | 16                                   | 1.8                    |
|                     | MKN1       | 11                                   | 1.6                    |
|                     | MKN7       | 3.1                                  | 2.0                    |
|                     | MKN28      | 4.6                                  | 1.7                    |
|                     | MKN45      | 10                                   | 1.6                    |
| Prostate            | MKN74      | 2.3                                  | 1.7                    |
|                     | DU-145     | 14                                   | 1.9                    |
|                     | PC-3       | 16                                   | 1.8                    |
| MG-MID <sup>c</sup> |            | -5.17                                | -5.75                  |
| Delta <sup>d</sup>  |            | 0.59                                 | 0.16                   |
| Range <sup>e</sup>  |            | 1.02                                 | 0.24                   |

<sup>a</sup> Concentrations for the inhibition of cell growth at 50% relative to control.

<sup>b</sup> Cell growth was determined according to the sulforhodamine B assay.

<sup>c</sup> Mean GI<sub>50</sub> value in all of the cell lines tested.

<sup>d</sup> Difference in the GI<sub>50</sub> value between the most-sensitive cells and the MG-MID value.

<sup>e</sup> Difference in the log GI<sub>50</sub> value between the most- and least-sensitive cells.



**Table S2** Results of COMPARE

| sample                      | known compounds    | r<br>(correlation coefficient) | molecular targets/drug type                                                                         |
|-----------------------------|--------------------|--------------------------------|-----------------------------------------------------------------------------------------------------|
| halichonine B<br>free amine | Tamoxifen citrate  | 0.724                          | Selective Estrogen Receptor Modulators (SERM), anticancer drugs, Protein Kinase C estrogen receptor |
| halichonine B<br>HCl salt   | Toremifene citrate | 0.494                          | Selective Estrogen Receptor Modulators (SERM), anticancer drugs/estrogen antagonist                 |
|                             | Tamoxifen citrate  | 0.48                           | Selective Estrogen Receptor Modulators (SERM), anticancer drugs, Protein Kinase C estrogen receptor |

**Figure S1** Relationship between the diamine chain length of halichonine B analogues and cytotoxicity against HL60 cells

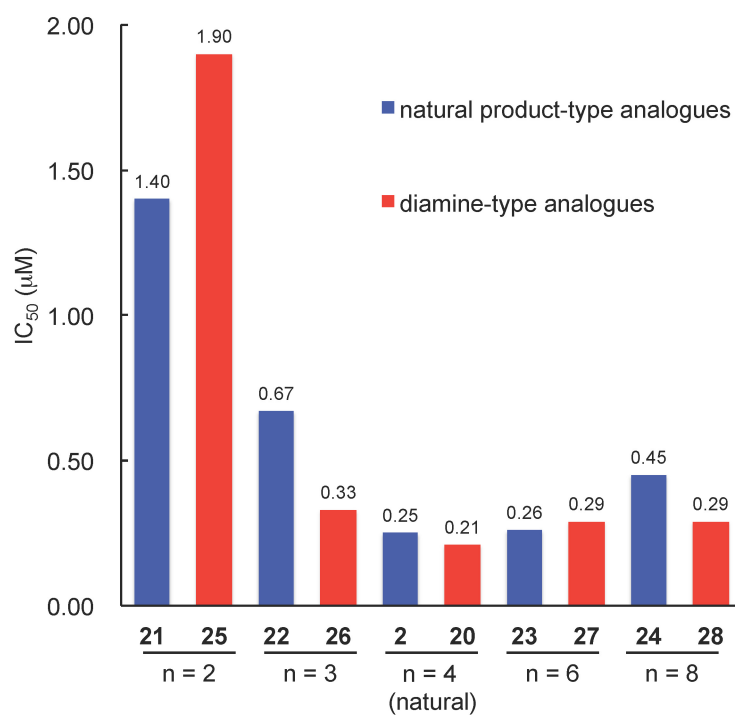

## Experimental protocols and characterization data of artificial analogues

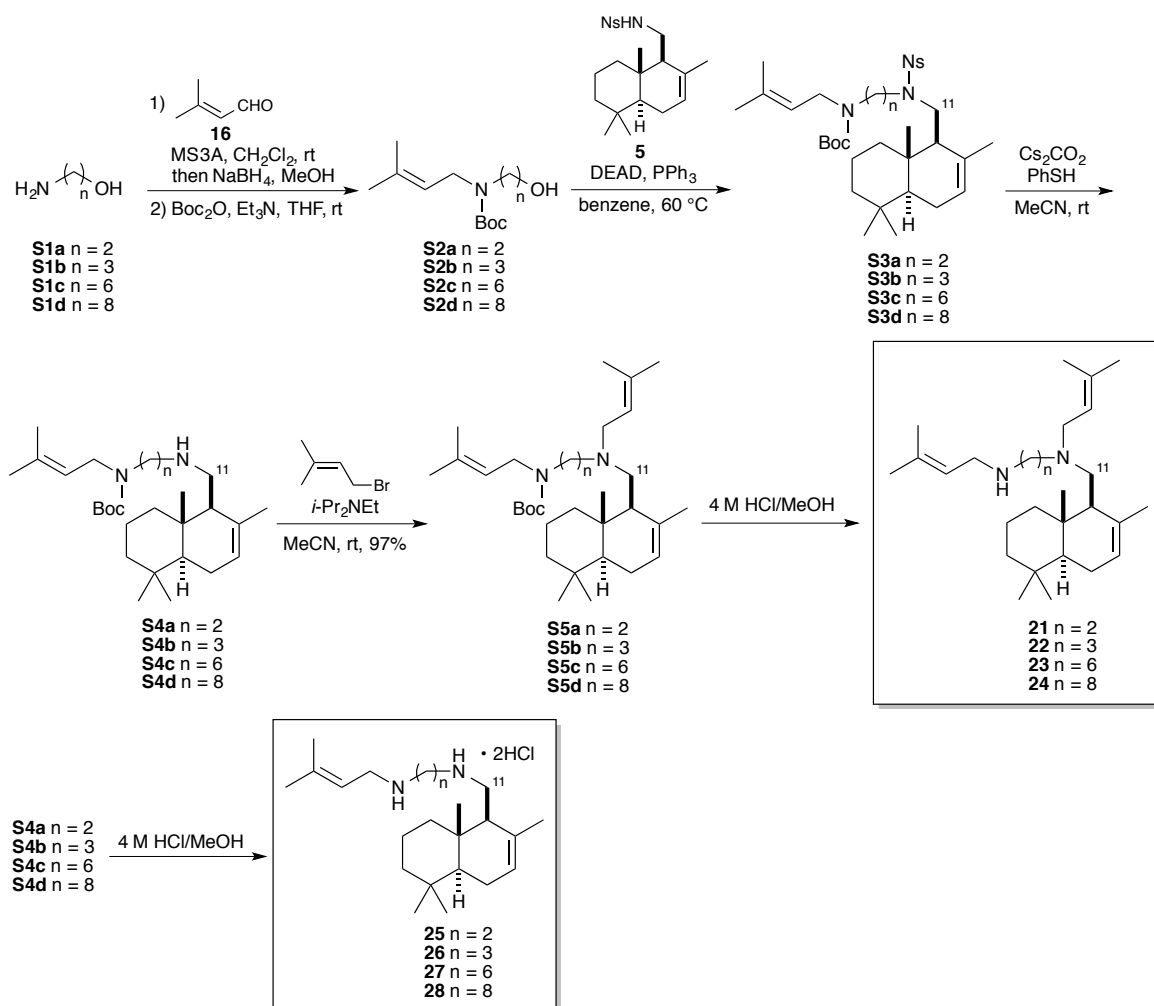

### General procedure for the preparation of alcohol **S2a-d**

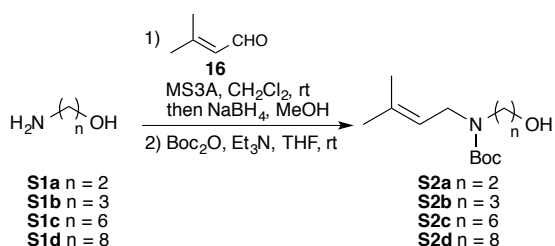

To a stirred solution of amino alcohol **S1a-d** in  $\text{CH}_2\text{Cl}_2$  (ca. 0.1 M) containing molecular sieves 3 Å was added 3-methyl-2-butenal (**16**) (1.1 equiv.) at room temperature, and the mixture was stirred at room temperature for ca. 20 h. The mixture was filtered through a pad of Celite, and the residue was washed with  $\text{CH}_2\text{Cl}_2$ . Concentration of the filtrate and washings afforded the crude imine intermediate.

To a stirred solution of the crude imine intermediate in MeOH (ca. 1.0 M) was added NaBH<sub>4</sub> (2.0 equiv.) at 0 °C. After being stirred at room temperature for 30 min, the reaction mixture was diluted with H<sub>2</sub>O and extracted with  $\text{CH}_2\text{Cl}_2$  ( $\times 5$ ). The combined extracts were washed with brine, dried

over Na<sub>2</sub>SO<sub>4</sub>, and filtered. Removal of the solvent afforded the crude amine, which was used for the next reaction without further purification.

To a stirred solution of the crude amine in THF (ca. 0.2 M) were added Boc<sub>2</sub>O (1.2 equiv.) and Et<sub>3</sub>N (2.0 equiv.) at 0 °C. After being stirred at room temperature for ca. 1 h, the reaction mixture was diluted with saturated aqueous NH<sub>4</sub>Cl and extracted with EtOAc (× 3). The combined extracts were washed with brine, dried over MgSO<sub>4</sub>, filtered, and concentrated. The crude product was purified by column chromatography on silica gel (*n*-hexane–Et<sub>2</sub>O 5 : 1 → *n*-hexane–EtOAc 1 : 1 for **S2a**; *n*-hexane–EtOAc for **S2b–S2d**) to give alcohol **S2a–d**.

*tert*-butyl (2-hydroxyethyl)(3-methylbut-2-en-1-yl)carbamate [**S2a** (n = 2)]. Colorless oil (168 mg, 50% yield in 2 steps): *R*<sub>f</sub> = 0.51 (*n*-hexane–EtOAc 2 : 1); IR (CHCl<sub>3</sub>) 3429, 3010, 2980, 2934, 1665, 1455, 1415, 1252, 1166, 1050, 869 cm<sup>-1</sup>; <sup>1</sup>H NMR (600 MHz, CDCl<sub>3</sub>) δ 5.14 (m, 1H), 3.93–3.77 (br m, 2H), 3.74–3.63 (m, 2H), 3.42–3.20 (br m, 3H), 1.71 (s, 3H), 1.64 (s, 3H), 1.44 (s, 9H); <sup>13</sup>C NMR (150 MHz, CDCl<sub>3</sub>) δ 157.0, 135.4, 120.6, 80.0, 62.5, 49.6, 46.2, 28.4 (3C), 25.7, 17.8; HRMS (ESI) *m/z* 252.1568, calcd for C<sub>12</sub>H<sub>23</sub>NNaO<sub>3</sub> [M+Na]<sup>+</sup> 252.1576.

*tert*-butyl (3-hydroxypropyl)(3-methylbut-2-en-1-yl)carbamate [**S2b** (n = 3)]. Colorless oil (378 mg, quant. in 2 steps): *R*<sub>f</sub> = 0.54 (*n*-hexane–EtOAc 1 : 1); IR (CHCl<sub>3</sub>) 3411, 3009, 2980, 2937, 1661, 1478, 1420, 1253, 1164, 1076, 883 cm<sup>-1</sup>; <sup>1</sup>H NMR (600 MHz, CDCl<sub>3</sub>) δ 5.13 (m, 1H), 3.97–3.68 (br m, 3H), 3.62–3.44 (br m, 2H), 3.39–3.20 (br m, 2H), 1.79–1.37 (m, 2H), 1.71 (s, 3H), 1.64 (s, 3H), 1.43 (s, 9H); <sup>13</sup>C NMR (150 MHz, CDCl<sub>3</sub>) δ 157.0, 134.8, 120.7, 79.9, 58.4, 44.7, 42.1, 30.5, 28.4 (3C), 25.6, 17.7; HRMS (ESI) *m/z* 266.1746, calcd for C<sub>13</sub>H<sub>25</sub>NNaO<sub>3</sub> [M+Na]<sup>+</sup> 266.1732.

*tert*-butyl (6-hydroxyhexyl)(3-methylbut-2-en-1-yl)carbamate [**S2c** (n = 6)]. Colorless oil (192 mg, 82% yield in 2 steps): *R*<sub>f</sub> = 0.55 (*n*-hexane–EtOAc 2 : 1); IR (CHCl<sub>3</sub>) 3626, 3449, 3008, 2978, 2935, 1668, 1454, 1419, 1251, 1168, 1077, 882 cm<sup>-1</sup>; <sup>1</sup>H NMR (600 MHz, CDCl<sub>3</sub>) δ 5.13 (m, 1H), 3.88–3.70 (br m, 2H), 3.62 (t, *J* = 6.5 Hz, 2H), 3.24–3.04 (br m, 2H), 1.71 (s, 3H), 1.65 (s, 3H), 1.61–1.23 (m, 8H), 1.44 (s, 9H). A signal due to one proton (OH) was not observed; <sup>13</sup>C NMR (150 MHz, CDCl<sub>3</sub>) δ 155.7, 134.7, 121.2, 79.1, 62.7, 46.0, 44.4, 32.7, 28.5 (3C), 28.2, 26.5, 25.6, 25.3, 17.7; HRMS (ESI) *m/z* 308.2201, calcd for C<sub>16</sub>H<sub>31</sub>NNaO<sub>3</sub> [M+Na]<sup>+</sup> 308.2202.

*tert*-butyl (8-hydroxyoctyl)(3-methylbut-2-en-1-yl)carbamate [**S2d** (n = 8)]. Colorless oil (202 mg, 78% yield in 2 steps): *R*<sub>f</sub> = 0.42 (*n*-hexane–EtOAc 2 : 1); IR (CHCl<sub>3</sub>) 3628, 3451, 3009, 2978, 2932, 1669, 1455, 1419, 1252, 1168, 1050, 880 cm<sup>-1</sup>; <sup>1</sup>H NMR (600 MHz, CDCl<sub>3</sub>) δ 5.14 (m, 1H), 3.89–3.69 (br m, 2H), 3.63 (t, *J* = 6.6 Hz, 2H), 3.20–3.01 (br m, 2H), 1.71 (s, 3H), 1.65 (s, 3H), 1.59–1.18 (m, 12H), 1.44 (s, 9H). A signal due to one proton (OH) was not observed; <sup>13</sup>C NMR (150

MHz, CDCl<sub>3</sub>)  $\delta$  155.6, 134.0, 121.2, 79.0, 62.8, 46.2, 44.1, 32.7, 29.3 (2C), 28.5 (3C), 28.2, 26.8, 25.6 (2C), 17.7; HRMS (ESI)  $m/z$  336.2539, calcd for C<sub>18</sub>H<sub>35</sub>NNaO<sub>3</sub> [M+Na]<sup>+</sup> 336.2515.

#### General procedure for the preparation of amine **S4a–d**

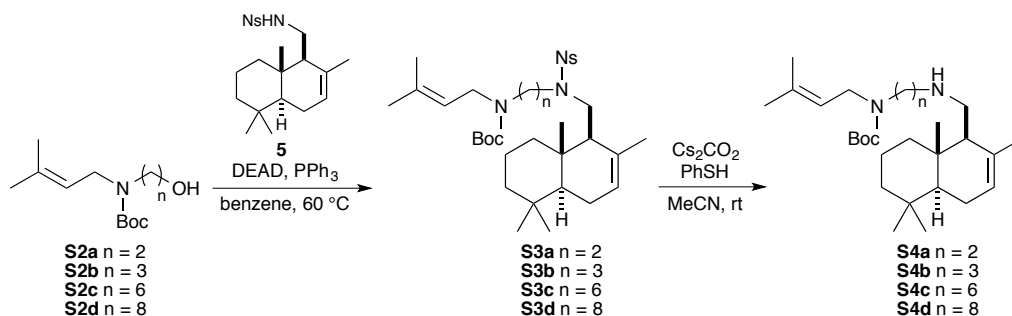

To a stirred solution of Ns-amide **5**, alcohol **S2a–d** (3.0 equiv.), and PPh<sub>3</sub> (3.0 equiv.) in benzene (0.10 M) was added DIAD (3.0 equiv.) at room temperature. The mixture was stirred at reflux for ca. 15 h. Removal of the solvent afforded crude product, which was purified by column chromatography on silica gel to give coupling compound **S3a–d** (containing impurities). The coupling compound **S3a–d** was used for the next reaction without further purification.

To a stirred solution of coupling compounds **S3a–d** (containing impurities) and Cs<sub>2</sub>CO<sub>3</sub> (1.7 equiv.) in MeCN (0.1 M) was added PhSH (1.4 equiv.) at 0 °C. After being stirred at room temperature for ca. 15 h, the mixture was filtered through a pad of Celite, and the residue was washed with EtOAc. Concentration of the filtrate and washings afforded the crude product, which was purified by column chromatography on Al<sub>2</sub>O<sub>3</sub> (*n*-hexane–Et<sub>2</sub>O) to give amine **S4a–d**.

*tert*-butyl (3-methylbut-2-en-1-yl)(2-((((1*S*,4*aS*,8*aS*)-2,5,5,8*a*-tetramethyl-1,4,4*a*,5,6,7,8,8*a*-octahydronaphthalen-1-yl)methyl)amino)ethyl)carbamate [**S4a** ( $n = 2$ )]. Yellow oil (18.8 mg, 30% yield in 2 steps):  $R_f = 0.58$  (CHCl<sub>3</sub>–MeOH 8 : 1);  $[\alpha]_D^{24} +2.8$  ( $c$  0.24, CHCl<sub>3</sub>); IR (CHCl<sub>3</sub>) 3360, 3020, 2927, 2850, 1682, 1456, 1416, 1366, 1251, 1166, 1138, 884 cm<sup>–1</sup>; <sup>1</sup>H NMR (600 MHz, CDCl<sub>3</sub>)  $\delta$  5.43 (m, 1H), 5.15 (m, 1H), 3.92–3.72 (br m, 2H), 3.38–3.14 (br m, 2H), 2.82–2.62 (m, 3H), 2.50 (m, 1H), 2.01–1.79 (m, 3H), 1.78–1.36 (m, 4H), 1.71 (s, 6H), 1.65 (s, 3H), 1.44 (s, 9H), 1.23–1.12 (m, 2H), 1.05 (ddd,  $J = 13.1, 13.1, 3.6$  Hz, 1H), 0.87 (s, 3H), 0.85 (s, 3H), 0.76 (s, 3H). A signal due to one proton (NH) was not observed; <sup>13</sup>C NMR (150 MHz, CDCl<sub>3</sub>)  $\delta$  155.7, 134.8, 134.3, 122.9, 121.1, 79.3, 55.5, 50.0, 48.6, 48.2, 46.5, 45.2, 42.2, 39.4, 36.2, 33.2, 32.9, 28.5 (3C), 25.7, 23.7, 21.9 (2C), 18.8, 17.8, 14.1; HRMS (ESI)  $m/z$  433.3796, calcd for C<sub>27</sub>H<sub>49</sub>N<sub>2</sub>O<sub>2</sub> [M+H]<sup>+</sup> 433.3789.

*tert*-butyl (3-methylbut-2-en-1-yl)(3-((((1*S*,4*aS*,8*aS*)-2,5,5,8*a*-tetramethyl-1,4,4*a*,5,6,7,8,8*a*-octahydronaphthalen-1-yl)methyl)amino)propyl)carbamate [**S4b** ( $n = 3$ )]. Yellow oil (21.5 mg, 63% yield in 2 steps):  $R_f = 0.47$  (CHCl<sub>3</sub>–MeOH 8 : 1);  $[\alpha]_D^{24} +3.3$  ( $c$  0.57, CHCl<sub>3</sub>); IR (CHCl<sub>3</sub>) 3330,

3009, 2927, 2856, 1681, 1456, 1419, 1366, 1251, 1167, 1137, 869  $\text{cm}^{-1}$ ;  $^1\text{H}$  NMR (600 MHz,  $\text{CDCl}_3$ )  $\delta$  5.42 (m, 1H), 5.13 (m, 1H), 3.88–3.68 (br m, 2H), 3.29–3.19 (br m, 2H), 2.67 (dd,  $J$  = 12.2, 1.5 Hz, 1H), 2.61 (ddd,  $J$  = 11.7, 7.1, 7.1 Hz, 1H), 2.56–2.41 (m, 2H), 2.00–1.22 (m, 9H), 1.72 (s, 3H), 1.70 (s, 3H), 1.64 (s, 3H), 1.44 (s, 9H), 1.20–1.11 (m, 2H), 1.06 (ddd,  $J$  = 13.1, 13.1, 3.4 Hz, 1H), 0.86 (s, 3H), 0.84 (s, 3H), 0.74 (s, 3H). A signal due to one proton (NH) was not observed;  $^{13}\text{C}$  NMR (150 MHz,  $\text{CDCl}_3$ )  $\delta$  155.6, 134.9, 134.3, 122.8, 121.1, 79.2, 55.2, 50.0, 48.2, 47.6, 44.5, 44.2, 42.2, 39.4, 36.2, 33.2, 32.9, 29.0, 28.5 (3C), 25.7, 23.7, 21.9 (2C), 18.8, 17.8, 14.0; HRMS (ESI)  $m/z$  447.3964, calcd for  $\text{C}_{28}\text{H}_{51}\text{N}_2\text{O}_2$   $[\text{M}+\text{H}]^+$  447.3945.

*tert*-butyl (3-methylbut-2-en-1-yl)(6-((((1*S*,4*aS*,8*aS*)-2,5,5,8*a*-tetramethyl-1,4,4*a*,5,6,7,8,8*a*-octahydronaphthalen-1-yl)methyl)amino)hexyl)carbamate [**S4c** ( $n$  = 6)]. Yellow oil (19.6 mg, 53% yield in 2 steps):  $R_f$  = 0.50 ( $\text{CHCl}_3$ –MeOH 8 : 1);  $[\alpha]_{\text{D}}^{24}$  +1.5 ( $c$  0.13,  $\text{CHCl}_3$ ); IR ( $\text{CHCl}_3$ ) 3336, 3018, 2930, 2855, 1681, 1456, 1419, 1366, 1251, 1168, 1134, 880  $\text{cm}^{-1}$ ;  $^1\text{H}$  NMR (600 MHz,  $\text{CDCl}_3$ )  $\delta$  5.42 (m, 1H), 5.13 (m, 1H), 3.85–3.70 (br m, 2H), 3.19–3.02 (br m, 2H), 2.69 (dd,  $J$  = 12.2, 1.6 Hz, 1H), 2.60 (ddd,  $J$  = 11.4, 7.2, 7.2 Hz, 1H), 2.50 (ddd,  $J$  = 11.4, 7.2, 7.2 Hz, 1H), 2.45 (dd,  $J$  = 12.2, 7.3 Hz, 1H), 2.00–1.12 (m, 17H), 1.71 (s, 3H), 1.71 (s, 3H), 1.64 (s, 3H), 1.44 (s, 9H), 1.07 (ddd,  $J$  = 13.2, 13.2, 3.7 Hz, 1H), 0.87 (s, 3H), 0.84 (s, 3H), 0.75 (s, 3H). A signal due to one proton (NH) was not observed;  $^{13}\text{C}$  NMR (150 MHz,  $\text{CDCl}_3$ )  $\delta$  155.6, 134.8, 134.3, 122.9, 121.2, 79.0, 55.3, 50.2, 50.0, 48.3, 46.2, 44.6, 42.2, 39.3, 36.2, 33.2, 33.0, 30.1, 28.5 (3C), 28.4, 27.2, 26.9, 25.7, 23.7, 21.9 (2C), 18.8, 17.8, 14.0; HRMS (ESI)  $m/z$  489.4430, calcd for  $\text{C}_{31}\text{H}_{57}\text{N}_2\text{O}_2$   $[\text{M}+\text{H}]^+$  489.4415.

*tert*-butyl (3-methylbut-2-en-1-yl)(8-((((1*S*,4*aS*,8*aS*)-2,5,5,8*a*-tetramethyl-1,4,4*a*,5,6,7,8,8*a*-octahydronaphthalen-1-yl)methyl)amino)octyl)carbamate [**S4d** ( $n$  = 8)]. Yellow oil (38.9 mg, 67% yield in 2 steps):  $R_f$  = 0.53 ( $\text{CHCl}_3$ –MeOH 8 : 1);  $[\alpha]_{\text{D}}^{24}$  +1.5 ( $c$  0.13,  $\text{CHCl}_3$ ); IR ( $\text{CHCl}_3$ ) 3355, 3018, 2929, 2856, 1669, 1457, 1419, 1366, 1251, 1168, 881  $\text{cm}^{-1}$ ;  $^1\text{H}$  NMR (600 MHz,  $\text{CDCl}_3$ )  $\delta$  5.42 (m, 1H), 5.13 (m, 1H), 3.87–3.68 (br m, 2H), 3.20–3.01 (br m, 2H), 2.69 (dd,  $J$  = 12.1, 1.2 Hz, 1H), 2.60 (ddd,  $J$  = 11.4, 7.2, 7.2 Hz, 1H), 2.50 (ddd,  $J$  = 11.4, 7.2, 7.2 Hz, 1H), 2.45 (dd,  $J$  = 12.1, 7.4 Hz, 1H), 2.00–1.79 (m, 3H), 1.77–1.12 (m, 18H), 1.72 (s, 3H), 1.70 (s, 3H), 1.64 (s, 3H), 1.44 (s, 9H), 1.07 (ddd,  $J$  = 13.1, 13.1, 3.6 Hz, 1H), 0.86 (s, 3H), 0.84 (s, 3H), 0.75 (s, 3H). A signal due to one proton (NH) was not observed;  $^{13}\text{C}$  NMR (150 MHz,  $\text{CDCl}_3$ )  $\delta$  155.6, 134.7, 134.3, 122.9, 121.2, 79.0, 55.3, 50.3, 50.0, 48.2, 46.2, 44.6, 42.2, 39.3, 36.2, 33.2, 33.0, 30.0, 29.5, 29.3, 28.5 (3C), 28.2, 27.4, 26.9, 25.7, 23.7, 21.9 (2C), 18.8, 17.8, 14.0; HRMS (ESI)  $m/z$  517.4735, calcd for  $\text{C}_{33}\text{H}_{61}\text{N}_2\text{O}_2$   $[\text{M}+\text{H}]^+$  517.4728

## General procedure for the preparation of **S5a–d**

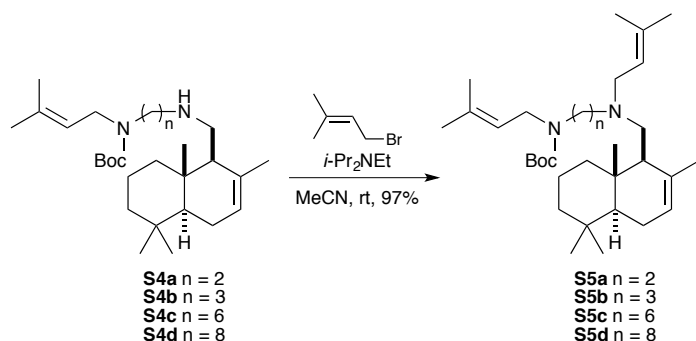

To a stirred solution of amine **S4a–d** in MeCN (0.2 M) were added *i*-Pr<sub>2</sub>NEt (1.0 equiv.) and prenyl bromide (2.4 equiv.) at 0 °C. After being stirred at room temperature for ca. 1.5–20 h, the reaction mixture was diluted with H<sub>2</sub>O and extracted with EtOAc (× 3). The combined extracts were washed with brine, dried over Na<sub>2</sub>SO<sub>4</sub>, filtered, and concentrated. The crude product was purified by column chromatography on Al<sub>2</sub>O<sub>3</sub> (*n*-hexane–Et<sub>2</sub>O for **S5a**, **S5c**, and **S5d**; *n*-hexane–Et<sub>2</sub>OAc 9 : 1 for **S5b**) to give compound **S5a–d**.

*tert*-butyl (3-methylbut-2-en-1-yl)(2-((3-methylbut-2-en-1-yl)((1*S*,4*aS*,8*aS*)-2,5,5,8*a*-tetramethyl-1,4,4*a*,5,6,7,8,8*a*-octahydronaphthalen-1-yl)methyl)amino)ethyl)carbamate [**S5a** ( $n = 2$ )]. Yellow oil (9.3 mg, 74% yield):  $R_f = 0.43$  (*n*-hexane–Et<sub>2</sub>O 4 : 1);  $[\alpha]_D^{24} +26.6$  ( $c$  0.45, CHCl<sub>3</sub>); IR (CHCl<sub>3</sub>) 2926, 2851, 1680, 1457, 1416, 1366, 1251, 1169, 880 cm<sup>-1</sup>; <sup>1</sup>H NMR (600 MHz, CDCl<sub>3</sub>)  $\delta$  5.38 (m, 1H), 5.24 (m, 1H), 5.14 (m, 1H), 3.91–3.72 (br m, 2H), 3.33–3.06 (br m, 3H), 2.90 (br m, 1H), 2.70 (br m, 1H), 2.40–2.21 (m, 3H), 2.06–1.90 (br m, 2H), 1.88–1.32 (m, 5H), 1.74 (s, 3H), 1.72 (s, 3H), 1.71 (s, 3H), 1.66 (s, 3H), 1.62 (s, 3H), 1.45 (s, 9H), 1.23–1.10 (m, 2H), 1.01 (ddd,  $J = 13.1, 13.1, 3.3$  Hz, 1H), 0.87 (s, 3H), 0.84 (s, 3H), 0.72 (s, 3H); <sup>13</sup>C NMR (150 MHz, CDCl<sub>3</sub>)  $\delta$  155.6, 135.8, 134.9, 134.2, 122.0, 121.9, 121.2, 79.1, 53.9, 52.0, 51.8 (2C), 50.2, 45.6, 44.8, 42.3, 39.2, 36.1, 33.3, 33.0, 28.5 (3C), 25.9, 25.8, 23.7, 22.4, 22.0, 18.8, 18.0, 17.8, 13.7; HRMS (ESI)  $m/z$  501.4401, calcd for C<sub>32</sub>H<sub>57</sub>N<sub>2</sub>O<sub>2</sub> [M+H]<sup>+</sup> 501.4415.

*tert*-butyl (3-methylbut-2-en-1-yl)(3-((3-methylbut-2-en-1-yl)((1*S*,4*aS*,8*aS*)-2,5,5,8*a*-tetramethyl-1,4,4*a*,5,6,7,8,8*a*-octahydronaphthalen-1-yl)methyl)amino)propyl)carbamate [**S5b** ( $n = 3$ )]. Yellow oil (8.0 mg, 53% yield):  $R_f = 0.61$  (*n*-hexane–Et<sub>2</sub>O 2 : 1);  $[\alpha]_D^{24} +42.2$  ( $c$  0.65, CHCl<sub>3</sub>); IR (CHCl<sub>3</sub>) 2926, 2878, 1669, 1445, 1419, 1366, 1251, 1167, 869 cm<sup>-1</sup>; <sup>1</sup>H NMR (600 MHz, CDCl<sub>3</sub>)  $\delta$  5.38 (m, 1H), 5.22 (m, 1H), 5.14 (m, 1H), 3.88–3.69 (br m, 2H), 3.21–2.98 (br m, 3H), 2.87 (m, 1H), 2.49 (br m, 1H), 2.33–2.14 (m, 3H), 2.03–1.92 (br m, 2H), 1.87–1.36 (m, 7H), 1.74 (s, 3H), 1.71 (s, 6H), 1.65 (s, 3H), 1.62 (s, 3H), 1.44 (s, 9H), 1.23–1.11 (m, 2H), 0.99 (ddd,  $J = 13.1, 13.1, 3.3$  Hz, 1H), 0.87 (s, 3H), 0.85 (s, 3H), 0.72 (s, 3H); <sup>13</sup>C NMR (150 MHz, CDCl<sub>3</sub>)  $\delta$  155.6, 136.0, 134.7, 134.0, 121.9, 121.8, 121.3, 79.0, 53.8, 51.6, 51.1, 51.0, 50.2, 45.2, 44.3, 42.3, 39.2, 36.1, 33.3, 33.0, 28.5

(3C), 25.9, 25.7 (2C), 23.7, 22.4, 22.0, 18.8, 17.9, 17.8, 13.7; HRMS (ESI)  $m/z$  515.4544, calcd for  $C_{33}H_{59}N_2O_2[M+H]^+$  515.4571.

*tert*-butyl (3-methylbut-2-en-1-yl)(6-((3-methylbut-2-en-1-yl)(((1*S*,4*aS*,8*aS*)-2,5,5,8*a*-tetramethyl-1,4,4*a*,5,6,7,8,8*a*-octahydronaphthalen-1-yl)methyl)amino)hexyl)carbamate [**S5c** ( $n = 6$ )]. Yellow oil (12.1 mg, quant):  $R_f = 0.63$  (*n*-hexane–Et<sub>2</sub>O 4 : 1);  $[\alpha]_D^{24} +36.6$  ( $c$  0.41, CHCl<sub>3</sub>); IR (CHCl<sub>3</sub>) 2929, 2857, 1669, 1454, 1419, 1366, 1251, 1168, 879 cm<sup>-1</sup>; <sup>1</sup>H NMR (600 MHz, CDCl<sub>3</sub>)  $\delta$  5.38 (m, 1H), 5.23 (m, 1H), 5.14 (m, 1H), 3.87–3.69 (br m, 2H), 3.19–3.03 (br m, 3H), 2.83 (dd,  $J = 14.2$ , 7.6 Hz, 1H), 2.48 (m, 1H), 2.32–2.24 (m, 2H), 2.18 (m, 1H), 2.05–1.92 (br m, 2H), 1.87–1.35 (m, 9H), 1.75 (s, 3H), 1.71 (s, 3H), 1.71 (s, 3H), 1.65 (s, 3H), 1.62 (s, 3H), 1.45 (s, 9H), 1.32–1.13 (m, 6H), 0.99 (ddd,  $J = 13.1$ , 13.1, 3.3 Hz, 1H), 0.87 (s, 3H), 0.85 (s, 3H), 0.73 (s, 3H); <sup>13</sup>C NMR (150 MHz, CDCl<sub>3</sub>)  $\delta$  155.6, 136.2, 134.6, 133.7, 122.2, 121.9, 121.2, 79.0, 53.8, 53.6, 51.5, 51.2, 50.3, 46.2, 44.4, 42.3, 39.2, 36.2, 33.3, 33.0, 28.5 (3C), 28.4, 27.5, 27.0, 26.9, 25.9, 25.7, 23.7, 22.4, 22.0, 18.8, 17.9, 17.8, 13.7; HRMS (ESI)  $m/z$  557.5031, calcd for  $C_{36}H_{65}N_2O_2[M+H]^+$  557.5041.

*tert*-butyl (3-methylbut-2-en-1-yl)(8-((3-methylbut-2-en-1-yl)(((1*S*,4*aS*,8*aS*)-2,5,5,8*a*-tetramethyl-1,4,4*a*,5,6,7,8,8*a*-octahydronaphthalen-1-yl)methyl)amino)octyl)carbamate [**S5d** ( $n = 8$ )]. Yellow oil (21.7 mg, 79% yield):  $R_f = 0.49$  (*n*-hexane–Et<sub>2</sub>O 4 : 1);  $[\alpha]_D^{24} +40.7$  ( $c$  0.44, CHCl<sub>3</sub>); IR (CHCl<sub>3</sub>) 2929, 2856, 1668, 1455, 1419, 1366, 1251, 1167, 1135, 881 cm<sup>-1</sup>; <sup>1</sup>H NMR (600 MHz, CDCl<sub>3</sub>)  $\delta$  5.38 (m, 1H), 5.23 (m, 1H), 5.14 (m, 1H), 3.87–3.69 (br m, 2H), 3.19–3.02 (br m, 3H), 2.84 (dd,  $J = 14.1$ , 7.6 Hz, 1H), 2.48 (m, 1H), 2.33–2.23 (m, 2H), 2.17 (m, 1H), 2.05–1.91 (br m, 2H), 1.88–1.35 (m, 9H), 1.75 (s, 3H), 1.71 (s, 6H), 1.65 (s, 3H), 1.62 (s, 3H), 1.45 (s, 9H), 1.32–1.11 (m, 10H), 0.98 (ddd,  $J = 13.1$ , 13.1, 3.3 Hz, 1H), 0.87 (s, 3H), 0.85 (s, 3H), 0.73 (s, 3H); <sup>13</sup>C NMR (150 MHz, CDCl<sub>3</sub>)  $\delta$  155.6, 136.3, 134.7, 133.6, 122.2, 121.8, 121.2, 79.0, 53.8, 53.6, 51.6, 51.2, 50.3, 46.2, 44.0, 42.3, 39.2, 36.2, 33.3, 33.0, 29.7, 29.4, 28.5 (3C), 28.3, 27.7, 26.9, 26.8, 25.9, 25.7, 23.7, 22.4, 22.0, 18.9, 17.9, 17.8, 13.7.; HRMS (ESI)  $m/z$  585.5359, calcd for  $C_{38}H_{69}N_2O_2[M+H]^+$  585.5354.

General procedure for the preparation of natural product-type analogues **21–24**

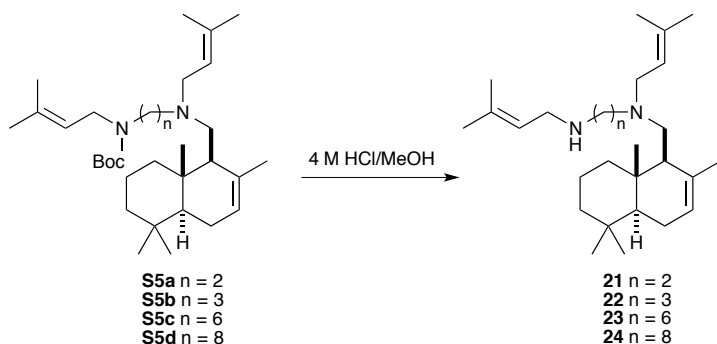



The compound **S5a–d** was treated with 4.0 M HCl/MeOH at 0 °C. After being stirred at room temperature for ca. 17 h, the reaction mixture was concentrated to afford **21–24** HCl salt. The **21–24** HCl salt was purified by column chromatography on Al<sub>2</sub>O<sub>3</sub> (CHCl<sub>3</sub>–MeOH for **21**, **23**, and **24**; *n*-hexane–EtOAc 5 : 1 for **22**) to give natural product-type analogues (free amine) **21–24**.

*N*<sup>1</sup>,*N*<sup>2</sup>-bis(3-methylbut-2-en-1-yl)-*N*<sup>1</sup>-((((1*S*,4*aS*,8*aS*)-2,5,5,8*a*-tetramethyl-1,4,4*a*,5,6,7,8,8*a*-octahydronaphthalen-1-yl)methyl)ethane-1,2-diamine [**21** (*n* = 2)]. Yellow oil (5.3 mg, quant.): *R*<sub>f</sub> = 0.48 (CHCl<sub>3</sub>–MeOH 9 : 1); [α]<sub>D</sub><sup>24</sup> +26.6 (*c* 0.12, CHCl<sub>3</sub>); IR (CHCl<sub>3</sub>) 3307, 2960, 2925, 2850, 1675, 1456, 1378, 1224, 1093, 987 cm<sup>−1</sup>; <sup>1</sup>H NMR (600 MHz, CD<sub>3</sub>OD) δ 5.40 (m, 1H), 5.30–5.21 (m, 2H), 3.24–3.18 (m, 2H), 3.15 (dd, *J* = 14.2, 6.1 Hz, 1H), 2.92 (dd, *J* = 14.2, 7.8 Hz, 1H), 2.79–2.57 (m, 3H), 2.43–2.50 (m, 3H), 2.06–1.82 (br m, 4H), 1.74 (s, 6H), 1.73 (s, 3H), 1.68 (s, 3H), 1.66 (s, 3H), 1.58 (m, 1H), 1.49–1.39 (m, 2H), 1.27–1.17 (m, 2H), 1.10 (ddd, *J* = 13.2, 13.2, 3.4 Hz, 1H), 0.90 (s, 3H), 0.87 (s, 3H), 0.77 (s, 3H). A signal due to one proton (NH) was not observed; <sup>13</sup>C NMR (150 MHz, CD<sub>3</sub>OD) δ 136.8, 136.4, 135.9, 123.4, 122.6, 122.5, 55.3, 53.5, 52.8, 52.7, 51.6, 47.5, 47.1, 43.4, 40.4, 37.4, 34.0, 33.8, 26.0, 25.9, 24.8, 23.0, 22.4, 19.8, 18.0 (2C), 14.2; HRMS (ESI) *m/z* 401.3860, calcd for C<sub>27</sub>H<sub>49</sub>N<sub>2</sub> [M+H]<sup>+</sup> 401.3890.

*N*<sup>1</sup>,*N*<sup>3</sup>-bis(3-methylbut-2-en-1-yl)-*N*<sup>1</sup>-((((1*S*,4*aS*,8*aS*)-2,5,5,8*a*-tetramethyl-1,4,4*a*,5,6,7,8,8*a*-octahydronaphthalen-1-yl)methyl)propane-1,3-diamine [**22** (*n* = 3)]. Yellow oil (1.9 mg, 40% yield): *R*<sub>f</sub> = 0.24 (CHCl<sub>3</sub>–MeOH 9 : 1); [α]<sub>D</sub><sup>24</sup> +40.5 (*c* 0.19, CHCl<sub>3</sub>); IR (CHCl<sub>3</sub>) 3388, 2960, 2928, 2855, 1675, 1456, 1378, 1261, 1095, 1006 cm<sup>−1</sup>; <sup>1</sup>H NMR (600 MHz, CD<sub>3</sub>OD) δ 5.39 (m, 1H), 5.30–5.19 (m, 2H), 3.18 (d, *J* = 6.9 Hz, 2H), 3.13 (m, 1H), 2.94 (dd, *J* = 14.2, 7.9 Hz, 1H), 2.68–2.55 (m, 3H), 2.35–2.25 (m, 3H), 2.08–1.92 (br m, 4H), 1.78–1.38 (m, 5H), 1.75 (s, 3H), 1.74 (s, 6H), 1.66 (s, 3H), 1.58 (s, 3H), 1.25–1.15 (m, 2H), 1.06 (ddd, *J* = 13.1, 13.1, 3.3 Hz, 1H), 0.90 (s, 3H), 0.87 (s, 3H), 0.77 (s, 3H). A signal due to one proton (NH) was not observed; <sup>13</sup>C NMR (150 MHz, CD<sub>3</sub>OD) δ 136.6, 135.7, 135.6, 123.3, 123.2, 122.7, 55.0, 53.2, 53.0, 52.3, 51.7, 49.6, 47.6, 43.5, 40.5, 37.4, 34.0, 33.8, 26.1, 25.9, 24.8, 22.9 (2C), 22.4, 19.9, 18.1, 18.0, 14.1; HRMS (ESI) *m/z* 415.4032, calcd for C<sub>28</sub>H<sub>51</sub>N<sub>2</sub> [M+H]<sup>+</sup> 415.4047.

*N*<sup>1</sup>,*N*<sup>6</sup>-bis(3-methylbut-2-en-1-yl)-*N*<sup>1</sup>-((((1*S*,4*aS*,8*aS*)-2,5,5,8*a*-tetramethyl-1,4,4*a*,5,6,7,8,8*a*-octahydronaphthalen-1-yl)methyl)hexane-1,6-diamine [**23** (*n* = 6)]. Yellow oil (4.1 mg, quant.): *R*<sub>f</sub> = 0.20 (CHCl<sub>3</sub>–MeOH 9 : 1); [α]<sub>D</sub><sup>24</sup> −39.7 (*c* 0.33, CHCl<sub>3</sub>); IR (CHCl<sub>3</sub>) 3300, 2929, 2856, 1666, 1456, 1378, 1266, 1096, 986 cm<sup>−1</sup>; <sup>1</sup>H NMR (400 MHz, CD<sub>3</sub>OD) δ 5.37 (m, 1H), 5.31–5.21 (m, 2H), 3.20 (d, *J* = 7.0 Hz, 2H), 3.13 (dd, *J* = 13.9, 5.7 Hz, 1H), 2.88 (dd, *J* = 13.9, 7.6 Hz, 1H), 2.61–2.47 (m, 3H), 2.38–2.17 (m, 3H), 2.17–1.80 (m, 4H), 1.75 (s, 3H), 1.74 (s, 3H), 1.72 (s, 3H), 1.67 (s, 3H), 1.65 (s, 3H), 1.62–1.14 (m, 13H), 1.03 (ddd, *J* = 13.1, 13.1, 3.4 Hz, 1H), 0.90 (s, 3H), 0.87 (s,

3H), 0.76 (s, 3H). A signal due to one proton (NH) was not observed;  $^{13}\text{C}$  NMR (100 MHz,  $\text{CD}_3\text{OD}$ )  $\delta$  136.9, 136.2, 135.1, 123.1, 123.0, 122.8, 54.9, 54.6, 53.0, 52.4, 51.7, 49.9, 47.6, 43.5, 40.6, 37.4, 34.0, 33.8, 30.3, 28.6, 28.4, 27.8, 26.1, 25.9, 24.8, 22.9, 22.4, 19.9, 18.0 (2C), 14.1; HRMS (ESI)  $m/z$  457.4521, calcd for  $\text{C}_{31}\text{H}_{57}\text{N}_2$   $[\text{M}+\text{H}]^+$  457.4516.

$N^1, N^8$ -bis(3-methylbut-2-en-1-yl)- $N^1$ -(((1*S*,4*aS*,8*aS*)-2,5,5,8*a*-tetramethyl-1,4,4*a*,5,6,7,8,8*a*-octahydronaphthalen-1-yl)methyl)octane-1,8-diamine [**24** ( $n = 8$ )]. Yellow oil (10.2 mg, 76% yield):  $R_f = 0.36$  ( $\text{CHCl}_3$ -MeOH 9 : 1);  $[\alpha]_{\text{D}}^{24} +41.1$  ( $c$  0.84,  $\text{CHCl}_3$ ); IR ( $\text{CHCl}_3$ ) 3305, 2929, 2855, 1670, 1456, 1381, 1271, 1095, 987  $\text{cm}^{-1}$ ;  $^1\text{H}$  NMR (400 MHz,  $\text{CD}_3\text{OD}$ )  $\delta$  5.37 (m, 1H), 5.30–5.20 (m, 2H), 3.19 (d,  $J = 6.8$  Hz, 2H), 3.13 (dd,  $J = 14.0, 6.0$  Hz, 1H), 2.88 (dd,  $J = 14.0, 7.5$  Hz, 1H), 2.62–2.48 (m, 3H), 2.40–2.18 (m, 3H), 2.11–1.81 (m, 4H), 1.75 (s, 3H), 1.74 (s, 3H), 1.72 (s, 3H), 1.67 (s, 3H), 1.65 (s, 3H), 1.62–1.16 (m, 17H), 1.04 (ddd,  $J = 13.1, 13.1, 3.4$  Hz, 1H), 0.90 (s, 3H), 0.87 (s, 3H), 0.76 (s, 3H). A signal due to one proton (NH) was not observed;  $^{13}\text{C}$  NMR (100 MHz,  $\text{CD}_3\text{OD}$ )  $\delta$  136.9, 136.1, 135.1, 123.2, 123.0, 122.9, 54.9, 54.6, 53.1, 52.4, 51.7, 50.0, 47.6, 43.5, 40.6, 37.4, 34.0, 33.9, 30.6 (2C), 30.4, 28.6, 28.4, 27.8, 26.1, 25.9, 24.8, 22.9, 22.4, 19.9, 18.0 (2C), 14.1; HRMS (ESI)  $m/z$  485.4820, calcd for  $\text{C}_{33}\text{H}_{61}\text{N}_2$   $[\text{M}+\text{H}]^+$  485.4829.

#### General procedure for the preparation of diamine-type analogues **25–28**

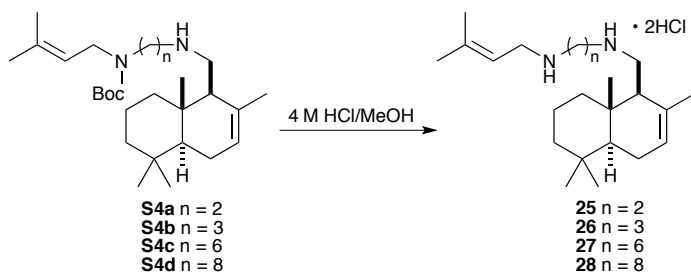

The amine **S4a–d** was treated with 4.0 M HCl/MeOH at 0 °C. After being stirred at room temperature for ca. 2.5–17 h, the reaction mixture was concentrated to afford diamine-type analogues **25–28**.

$N^1$ -(3-methylbut-2-en-1-yl)- $N^2$ -(((1*S*,4*aS*,8*aS*)-2,5,5,8*a*-tetramethyl-1,4,4*a*,5,6,7,8,8*a*-octahydronaphthalen-1-yl)methyl)ethane-1,2-diamine [**25** ( $n = 2$ )]. Yellow oil (4.6 mg, 95% yield):  $R_f = 0.28$  ( $\text{CHCl}_3$ -MeOH 4 : 1);  $[\alpha]_{\text{D}}^{24} -10.8$  ( $c$  0.43,  $\text{CHCl}_3$ ); IR ( $\text{CHCl}_3$ ) 3372, 2965, 2855, 2777, 2450, 1589, 1442, 1389, 1236, 983  $\text{cm}^{-1}$ ;  $^1\text{H}$  NMR (400 MHz,  $\text{CD}_3\text{OD}$ )  $\delta$  5.60 (m, 1H), 5.35 (t,  $J = 7.5$  Hz, 1H), 3.73 (d,  $J = 7.5$  Hz, 2H), 3.58–3.41 (m, 4H), 3.28–3.26 (m, 2H), 2.31–1.20 (m, 7H), 1.85 (s, 6H), 1.81 (s, 3H), 1.36–1.20 (m, 3H), 0.93 (s, 3H), 0.90 (s, 3H), 0.83 (s, 3H). Signals due to two proton (NH) were not observed;  $^{13}\text{C}$  NMR (100 MHz,  $\text{CD}_3\text{OD}$ )  $\delta$  145.2, 131.5, 126.3, 114.5,

53.8, 50.9, 48.7, 46.7, 46.1, 43.5, 43.0, 40.1, 37.7, 33.9, 33.5, 26.0, 24.7, 22.1, 22.0, 19.6, 18.4, 14.0; HRMS (ESI)  $m/z$  333.3278, calcd for  $C_{22}H_{41}N_2$   $[M+H]^+$  333.3264.

$N^1$ -(3-methylbut-2-en-1-yl)- $N^3$ -(((1*S*,4*aS*,8*aS*)-2,5,5,8*a*-tetramethyl-1,4,4*a*,5,6,7,8,8*a*-octahydronaphthalen-1-yl)methyl)propane-1,3-diamine [**26** ( $n = 3$ )]. Yellow solid (10.8 mg, 91% yield):  $R_f = 0.42$  ( $CHCl_3$ -MeOH 4 : 1);  $[\alpha]_D^{24} -10.7$  ( $c$  0.88,  $CHCl_3$ ); IR ( $CHCl_3$ ) 3393, 3040, 2964, 2763, 2690, 1456, 1240, 1167  $cm^{-1}$ ;  $^1H$  NMR (400 MHz,  $CD_3OD$ )  $\delta$  5.59 (m, 1H), 5.34 (m, 1H), 3.68 (d,  $J = 7.2$  Hz, 2H), 3.28–3.05 (m, 6H), 2.30–1.41 (m, 9H), 1.84 (s, 6H), 1.80 (s, 3H), 1.37–1.17 (m, 3H), 0.92 (s, 3H), 0.89 (s, 3H), 0.83 (s, 3H). Signals due to two proton (NH) were not observed;  $^{13}C$  NMR (100 MHz,  $CD_3OD$ )  $\delta$  144.4, 131.6, 126.2, 114.9, 53.7, 50.9, 48.2, 47.3, 46.5, 45.0, 43.0, 40.0, 37.7, 33.9, 33.5, 26.0, 24.7, 24.0, 22.1, 21.9, 19.6, 18.4, 14.0; HRMS (ESI)  $m/z$  347.3423, calcd for  $C_{23}H_{43}N_2$   $[M+H]^+$  347.3421.

$N^1$ -(3-methylbut-2-en-1-yl)- $N^6$ -(((1*S*,4*aS*,8*aS*)-2,5,5,8*a*-tetramethyl-1,4,4*a*,5,6,7,8,8*a*-octahydronaphthalen-1-yl)methyl)hexane-1,6-diamine [**27** ( $n = 6$ )]. Yellow oil (5.0 mg, 95% yield):  $R_f = 0.57$  ( $CHCl_3$ -MeOH 4 : 1);  $[\alpha]_D^{24} -7.6$  ( $c$  0.41,  $CHCl_3$ ); IR ( $CHCl_3$ ) 3409, 2964, 2861, 2774, 1592, 1457, 1385, 1241, 984  $cm^{-1}$ ;  $^1H$  NMR (600 MHz,  $CD_3OD$ )  $\delta$  5.59 (m, 1H), 5.31 (m, 1H), 3.63 (d,  $J = 6.4$  Hz, 2H), 3.21–2.93 (m, 6H), 2.20–1.42 (m, 15H), 1.83 (s, 3H), 1.81 (s, 3H), 1.78 (s, 3H), 1.32–1.15 (m, 3H), 0.92 (s, 3H), 0.89 (s, 3H), 0.82 (s, 3H). Signals due to two proton (NH) were not observed;  $^{13}C$  NMR (150 MHz,  $CD_3OD$ )  $\delta$  144.1, 131.6, 126.2, 115.2, 53.8, 51.0, 50.3, 48.0, 47.9, 46.4, 43.1, 40.1, 37.7, 33.9, 33.5, 27.2, 27.1, 26.7, 26.6, 26.0, 24.7, 22.1, 21.8, 19.7, 18.4, 14.1; HRMS (ESI)  $m/z$  389.3902, calcd for  $C_{26}H_{49}N_2$   $[M+H]^+$  389.3890.

$N^1$ -(3-methylbut-2-en-1-yl)- $N^8$ -(((1*S*,4*aS*,8*aS*)-2,5,5,8*a*-tetramethyl-1,4,4*a*,5,6,7,8,8*a*-octahydronaphthalen-1-yl)methyl)octane-1,8-diamine [**28** ( $n = 8$ )]. Yellow solid (8.0 mg, 87% yield):  $R_f = 0.66$  ( $CHCl_3$ -MeOH 4 : 1);  $[\alpha]_D^{24} -9.5$  ( $c$  0.68,  $CHCl_3$ ); IR ( $CHCl_3$ ) 3398, 2938, 2859, 2773, 1559, 1462, 1382, 1232, 987  $cm^{-1}$ ;  $^1H$  NMR (600 MHz,  $CD_3OD$ )  $\delta$  5.59 (m, 1H), 5.30 (m, 1H), 3.63 (d,  $J = 7.4$  Hz, 2H), 3.21–2.93 (m, 6H), 2.14–2.04 (m, 2H), 1.97–1.35 (m, 17H), 1.83 (s, 3H), 1.80 (s, 3H), 1.78 (s, 3H), 1.32–1.16 (m, 3H), 0.92 (s, 3H), 0.89 (s, 3H), 0.82 (s, 3H). Signals due to two proton (NH) were not observed;  $^{13}C$  NMR (150 MHz,  $CD_3OD$ )  $\delta$  144.0, 131.7, 126.2, 115.2, 53.8, 51.0, 50.3, 48.0, 47.7, 46.4, 43.1, 40.0, 37.7, 33.9, 33.5, 29.9 (2C), 27.5, 27.4, 27.3, 26.8, 26.0, 24.7, 22.1, 21.7, 19.7, 18.2, 14.0; HRMS (ESI)  $m/z$  417.4195, calcd for  $C_{28}H_{53}N_2$   $[M+H]^+$  417.4203.

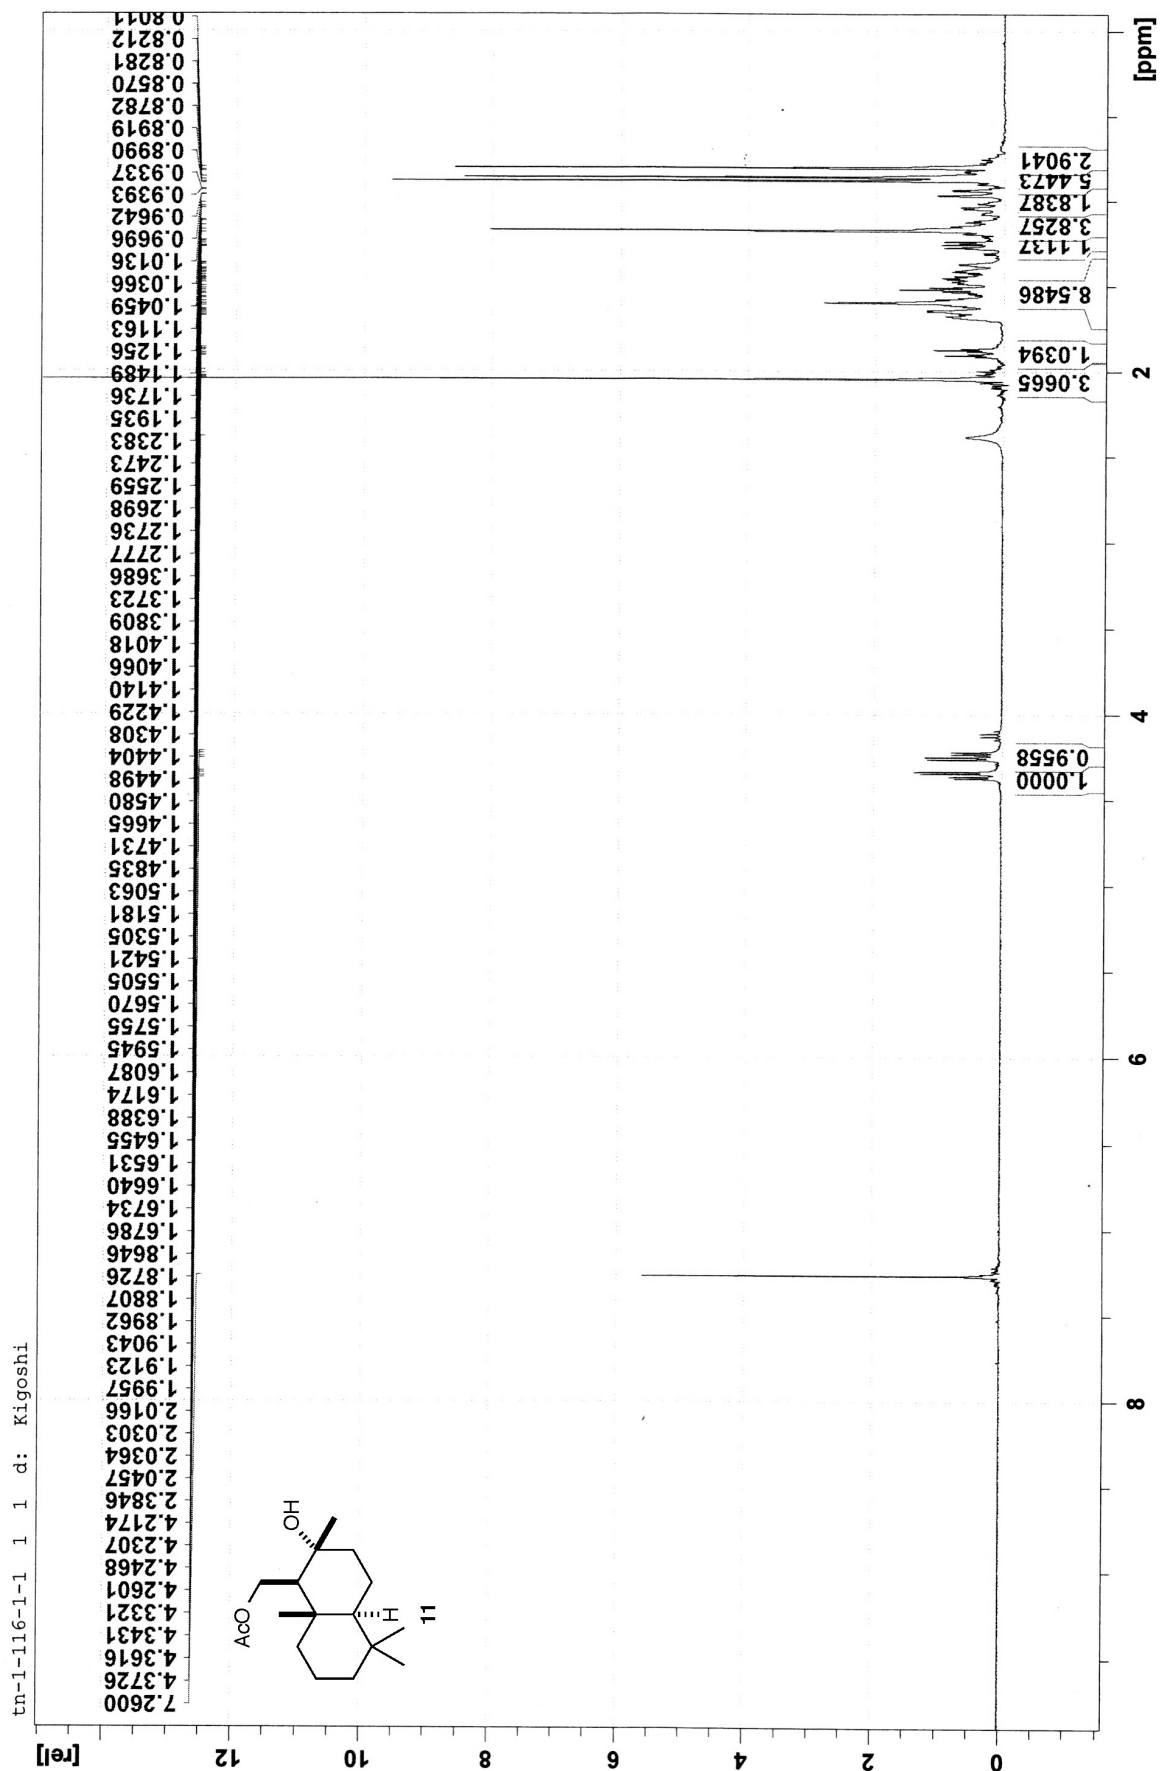

$^1\text{H}$  NMR spectra of **11** (400 MHz,  $\text{CDCl}_3$ )

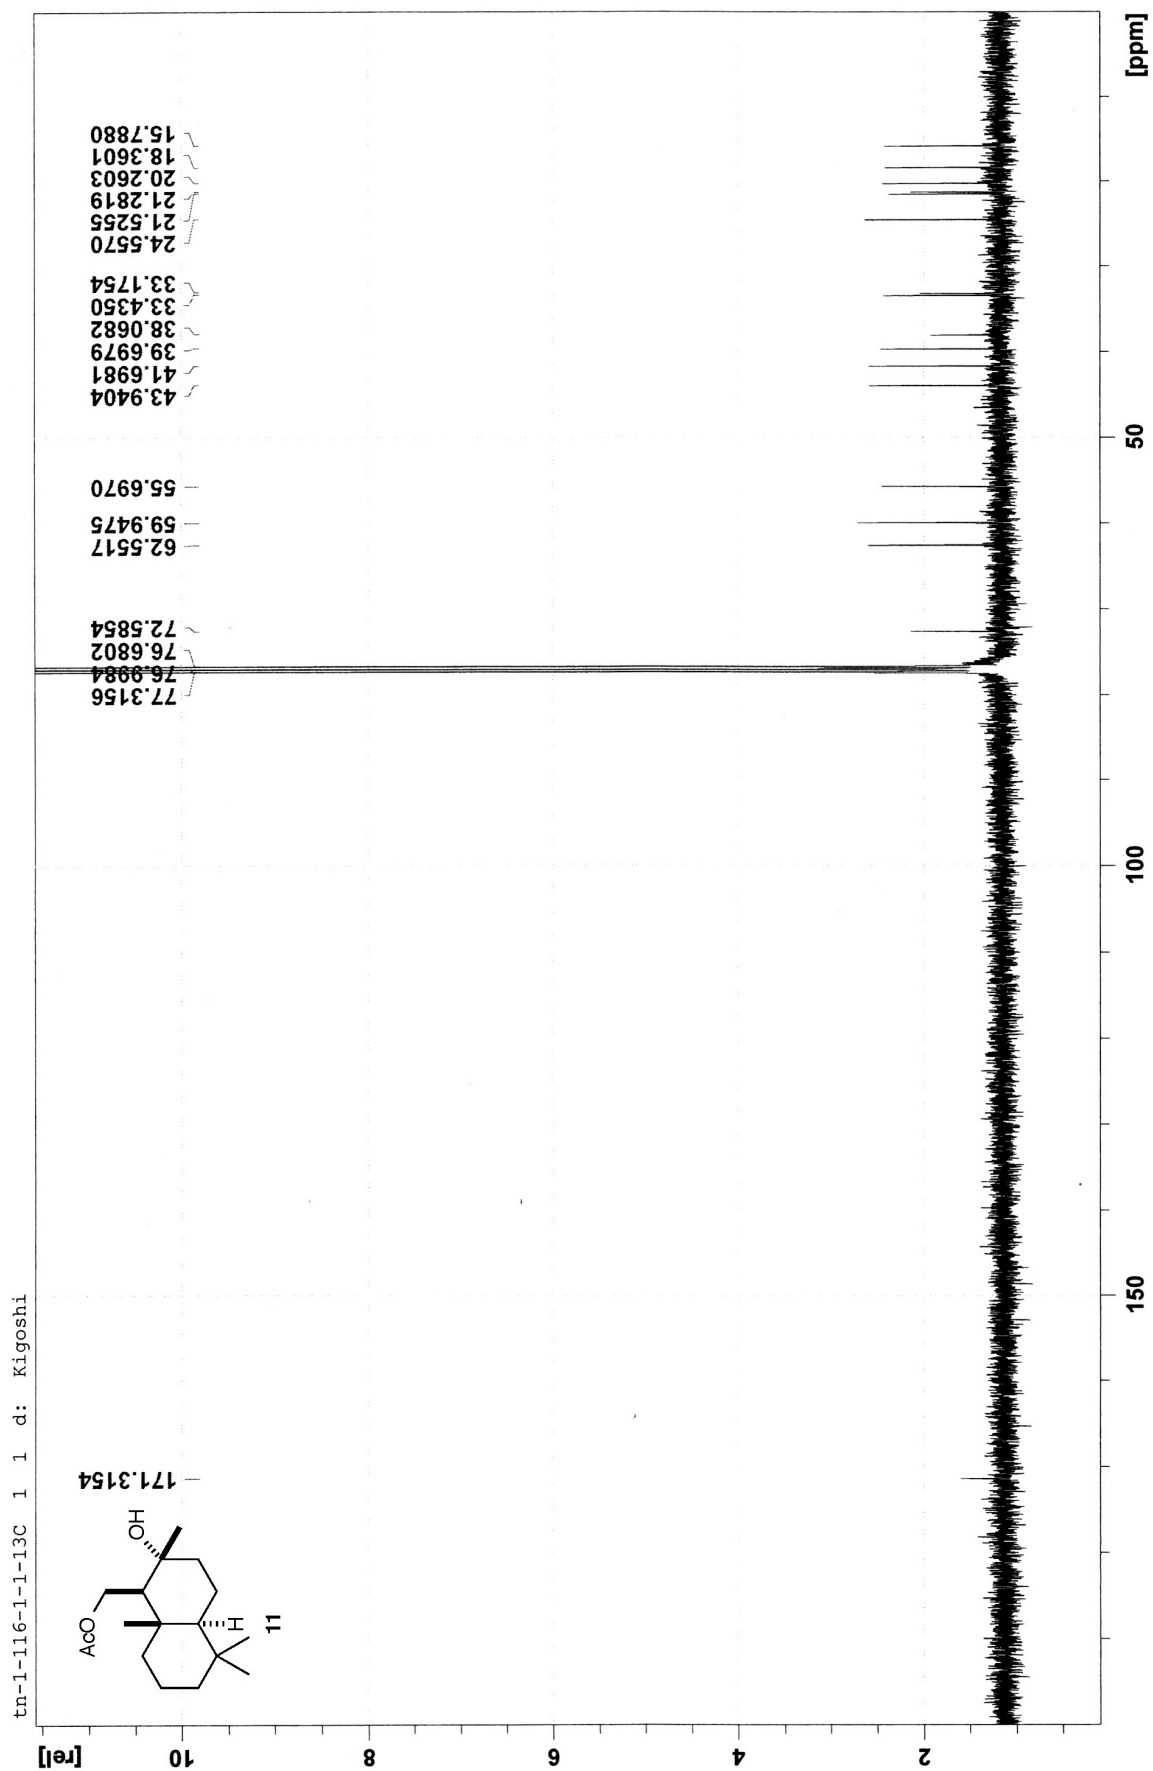

$^{13}\text{C}$  NMR spectra of **11** (100 MHz,  $\text{CDCl}_3$ )

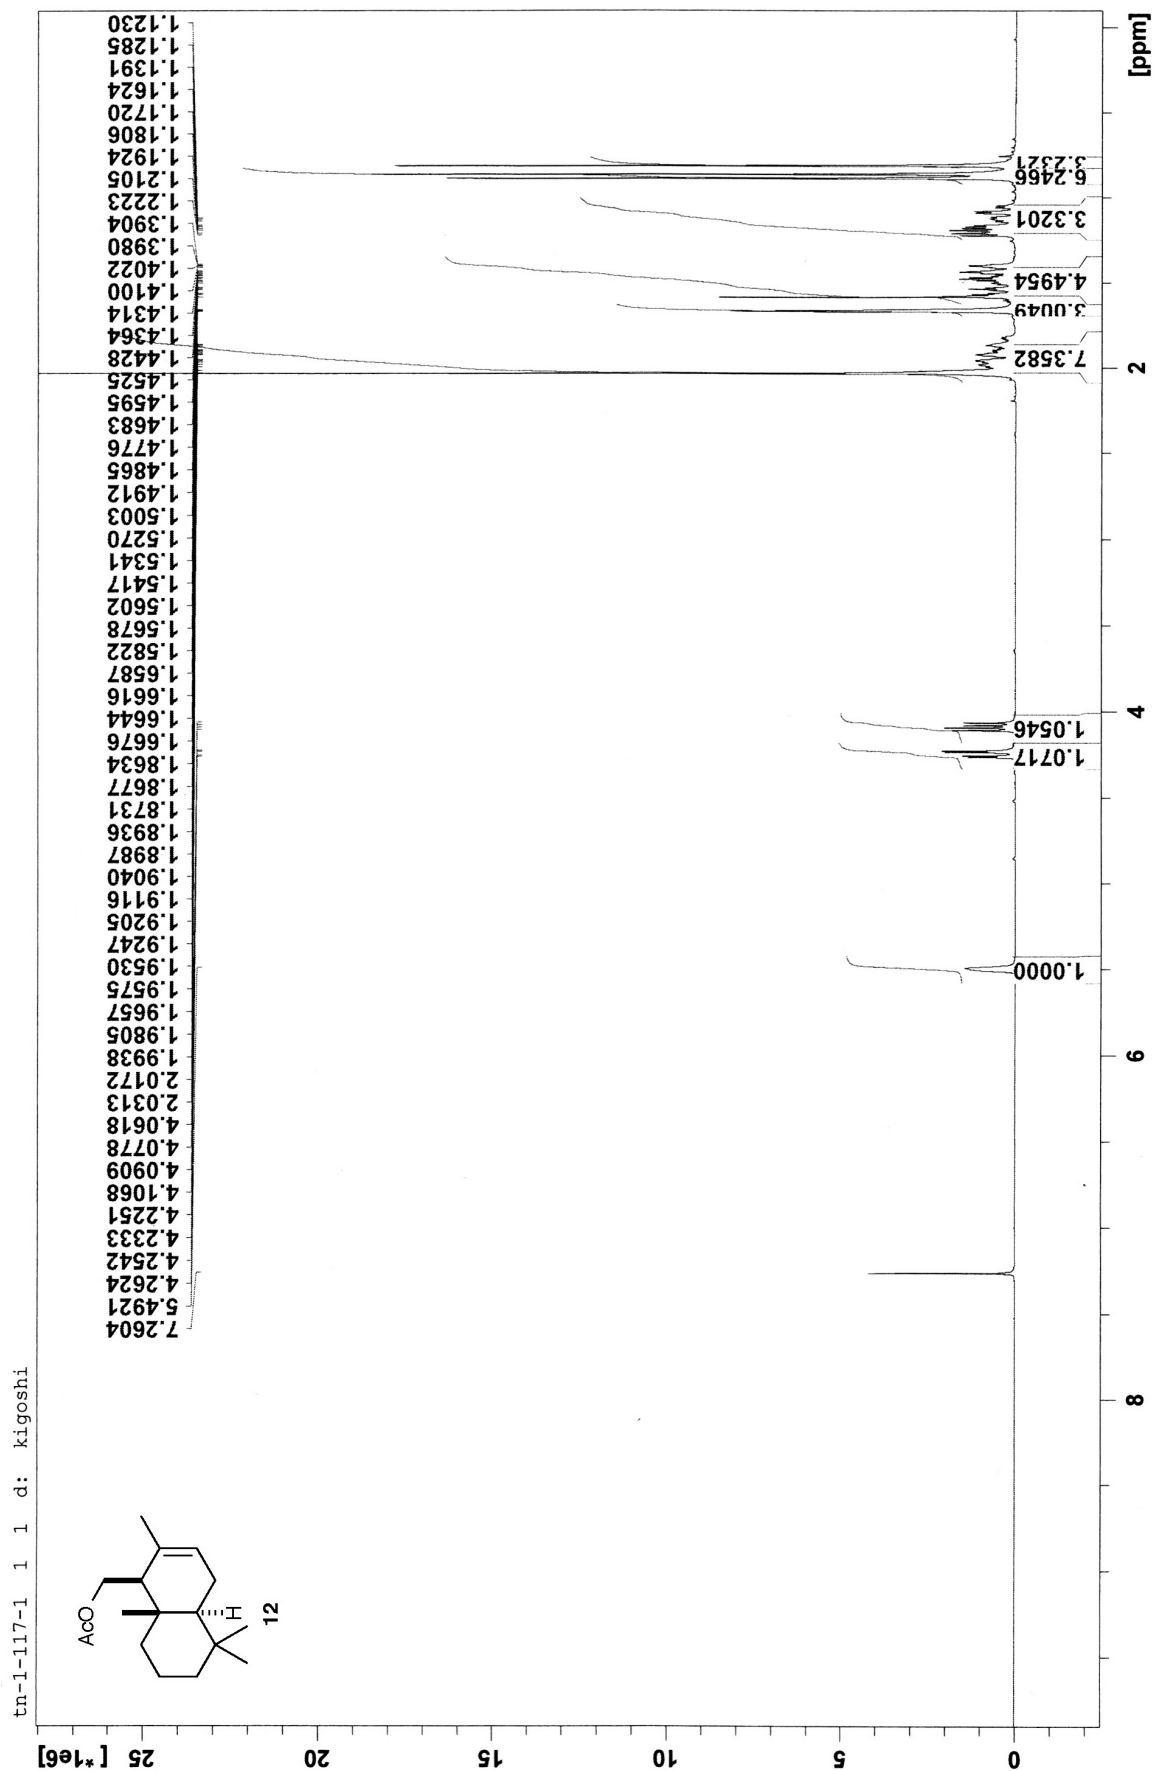

<sup>1</sup>H NMR spectra of **12** (400 MHz, CDCl<sub>3</sub>)

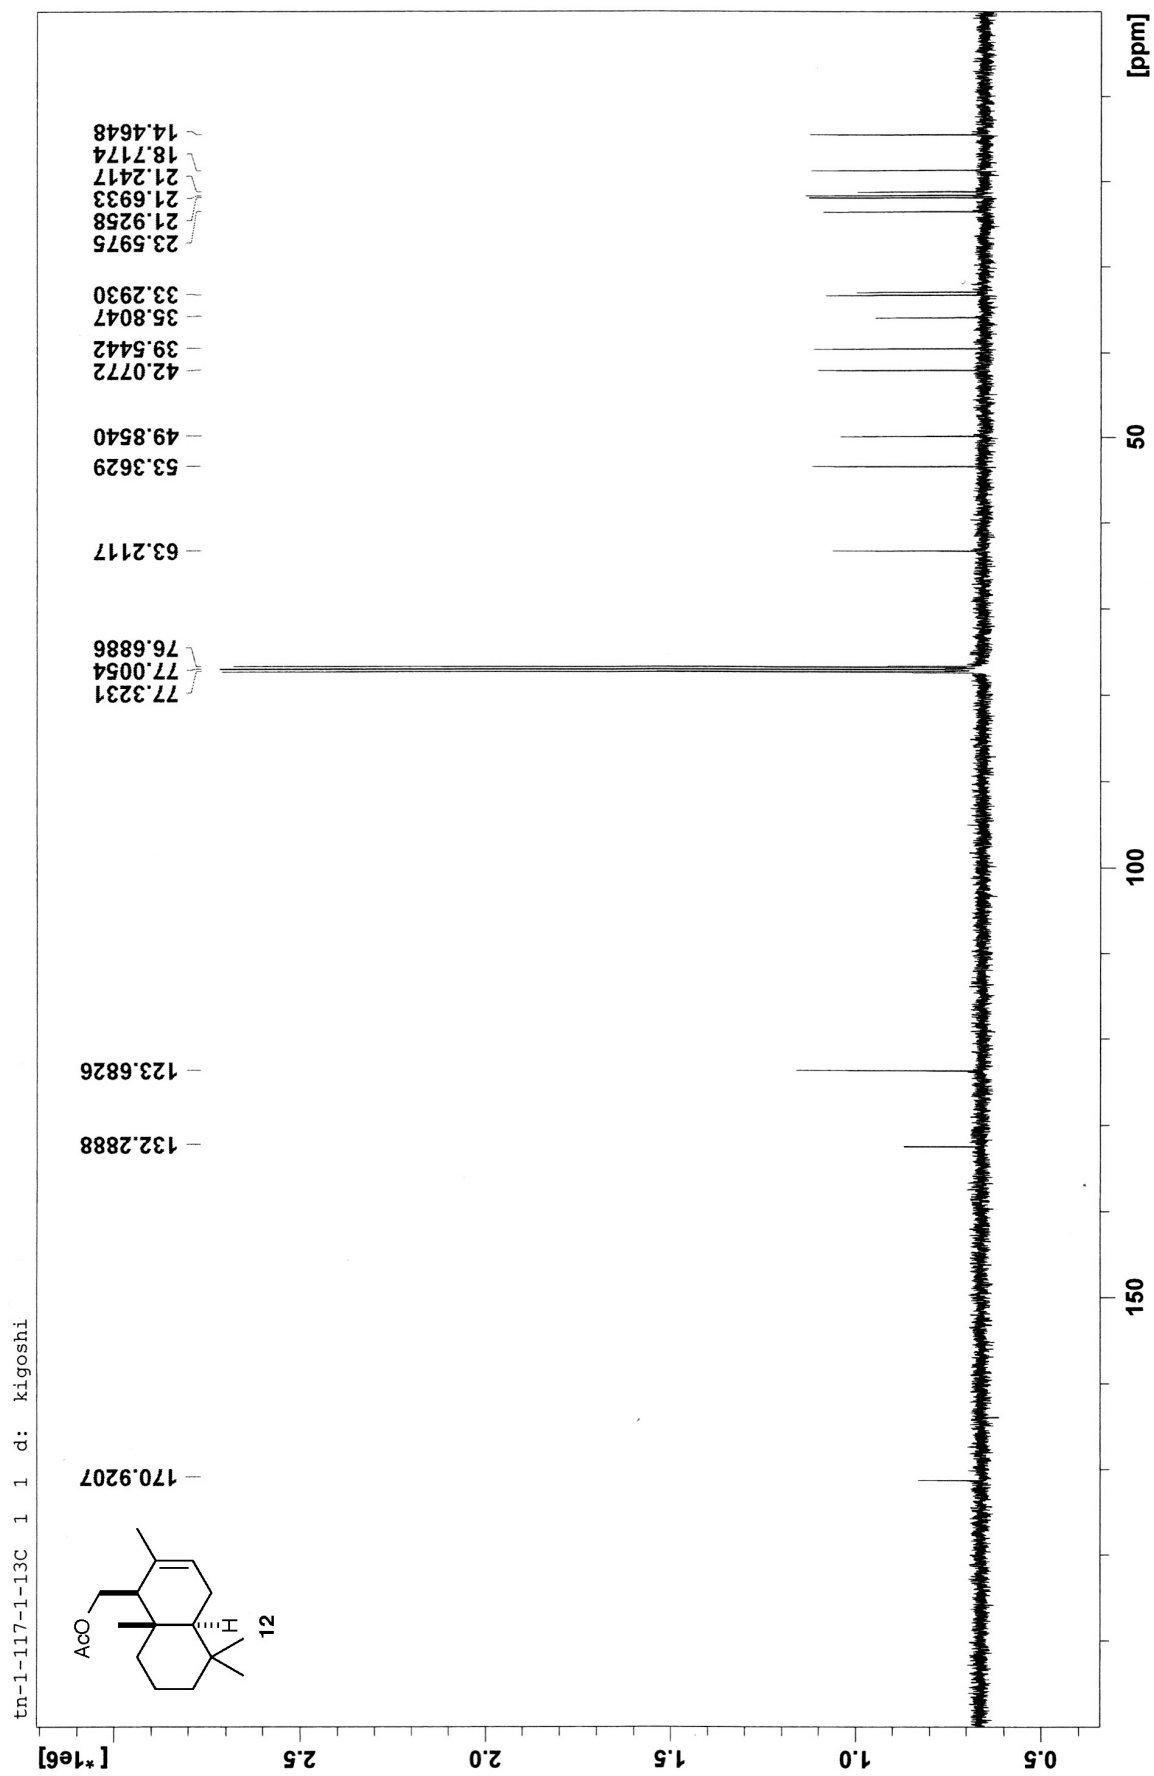

<sup>13</sup>C NMR spectra of **12** (100 MHz, CDCl<sub>3</sub>)

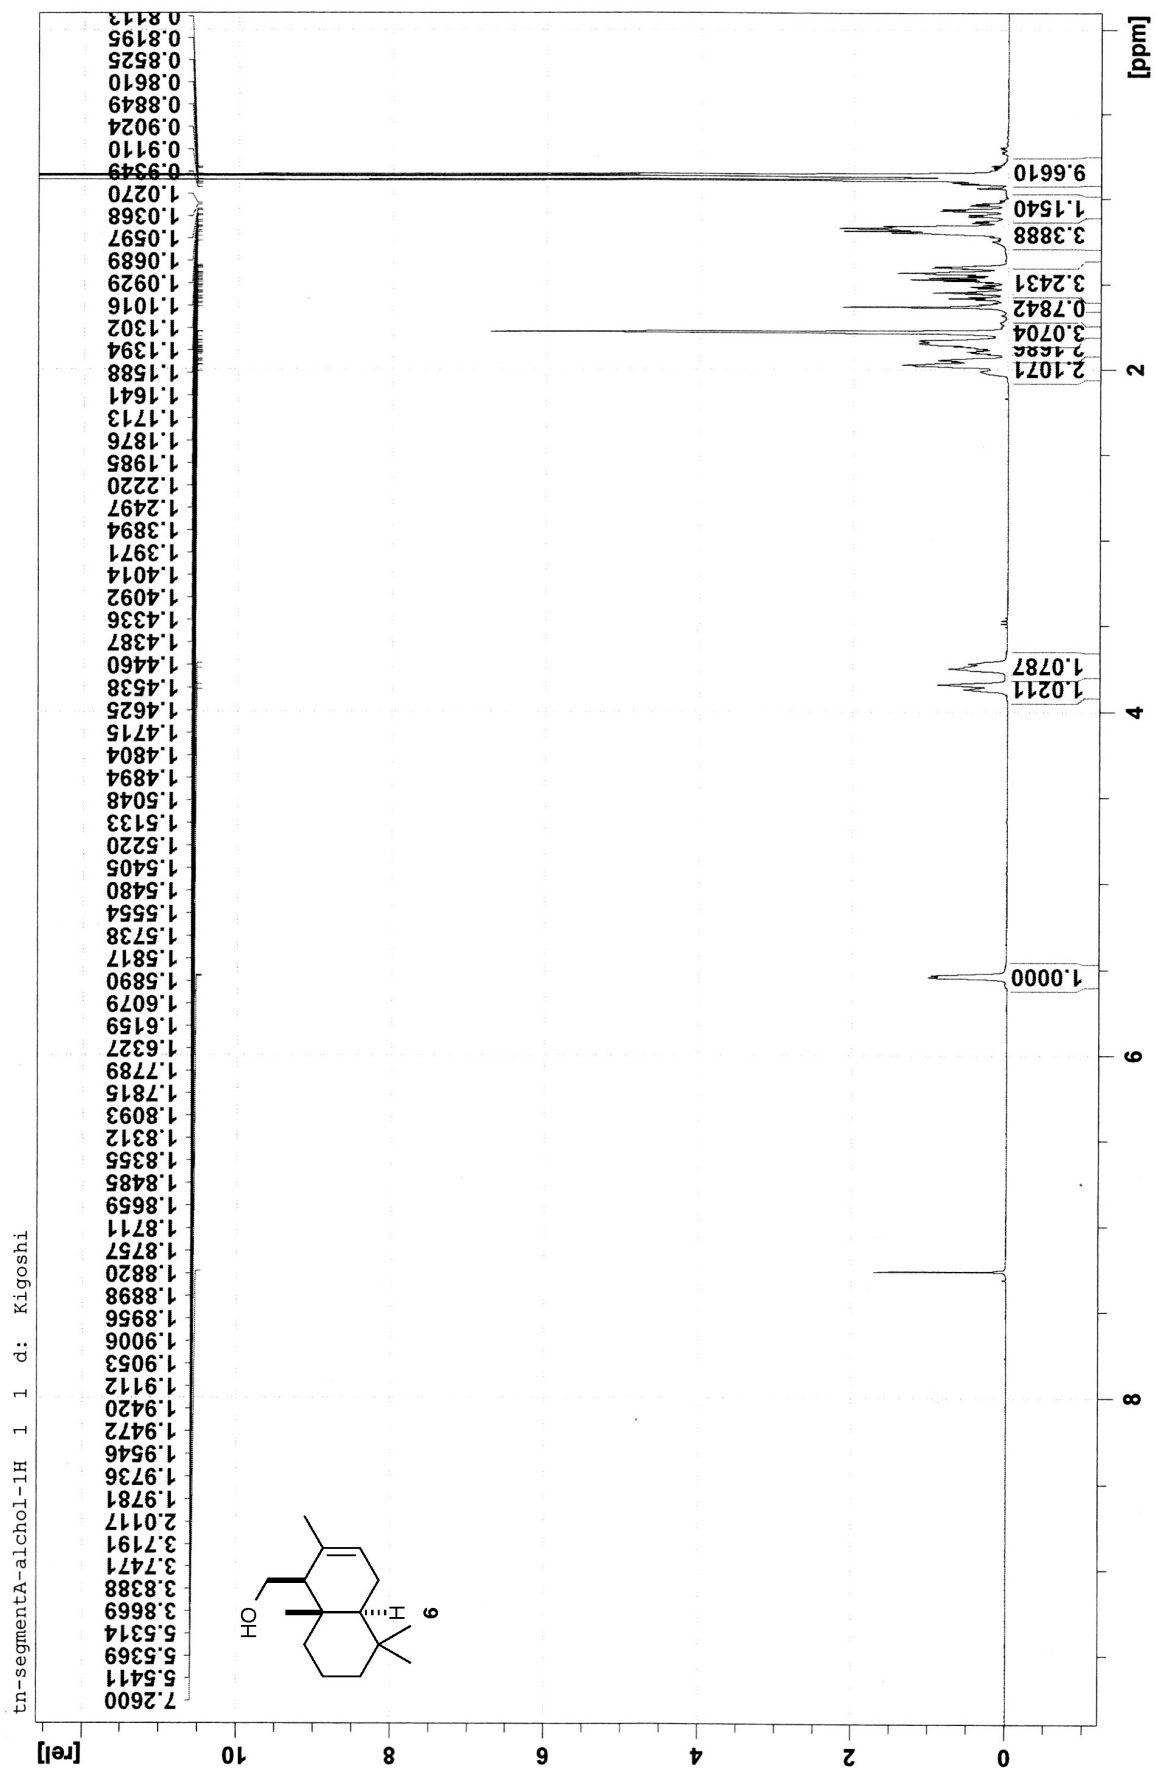

$^1\text{H}$  NMR spectra of **6** (400 MHz,  $\text{CDCl}_3$ )



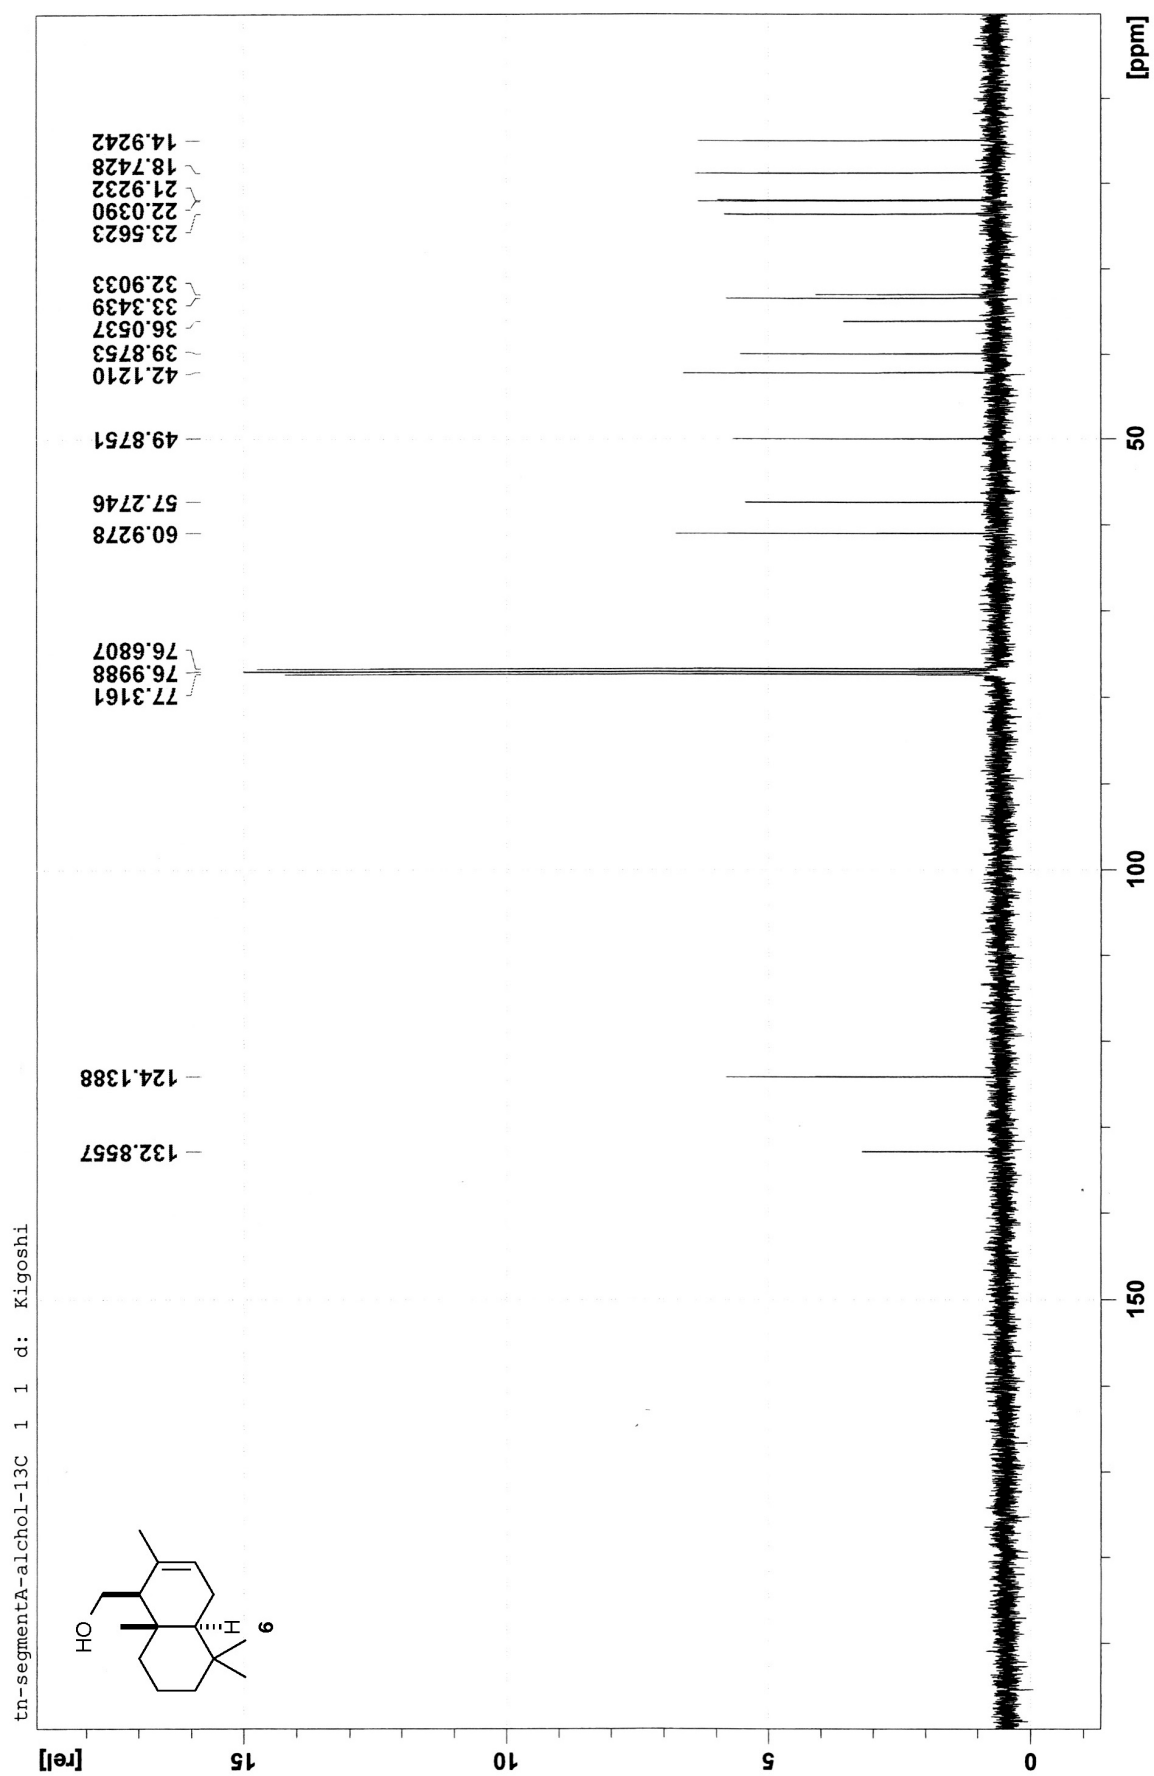

$^{13}\text{C}$  NMR spectra of **9** (100 MHz,  $\text{CDCl}_3$ )



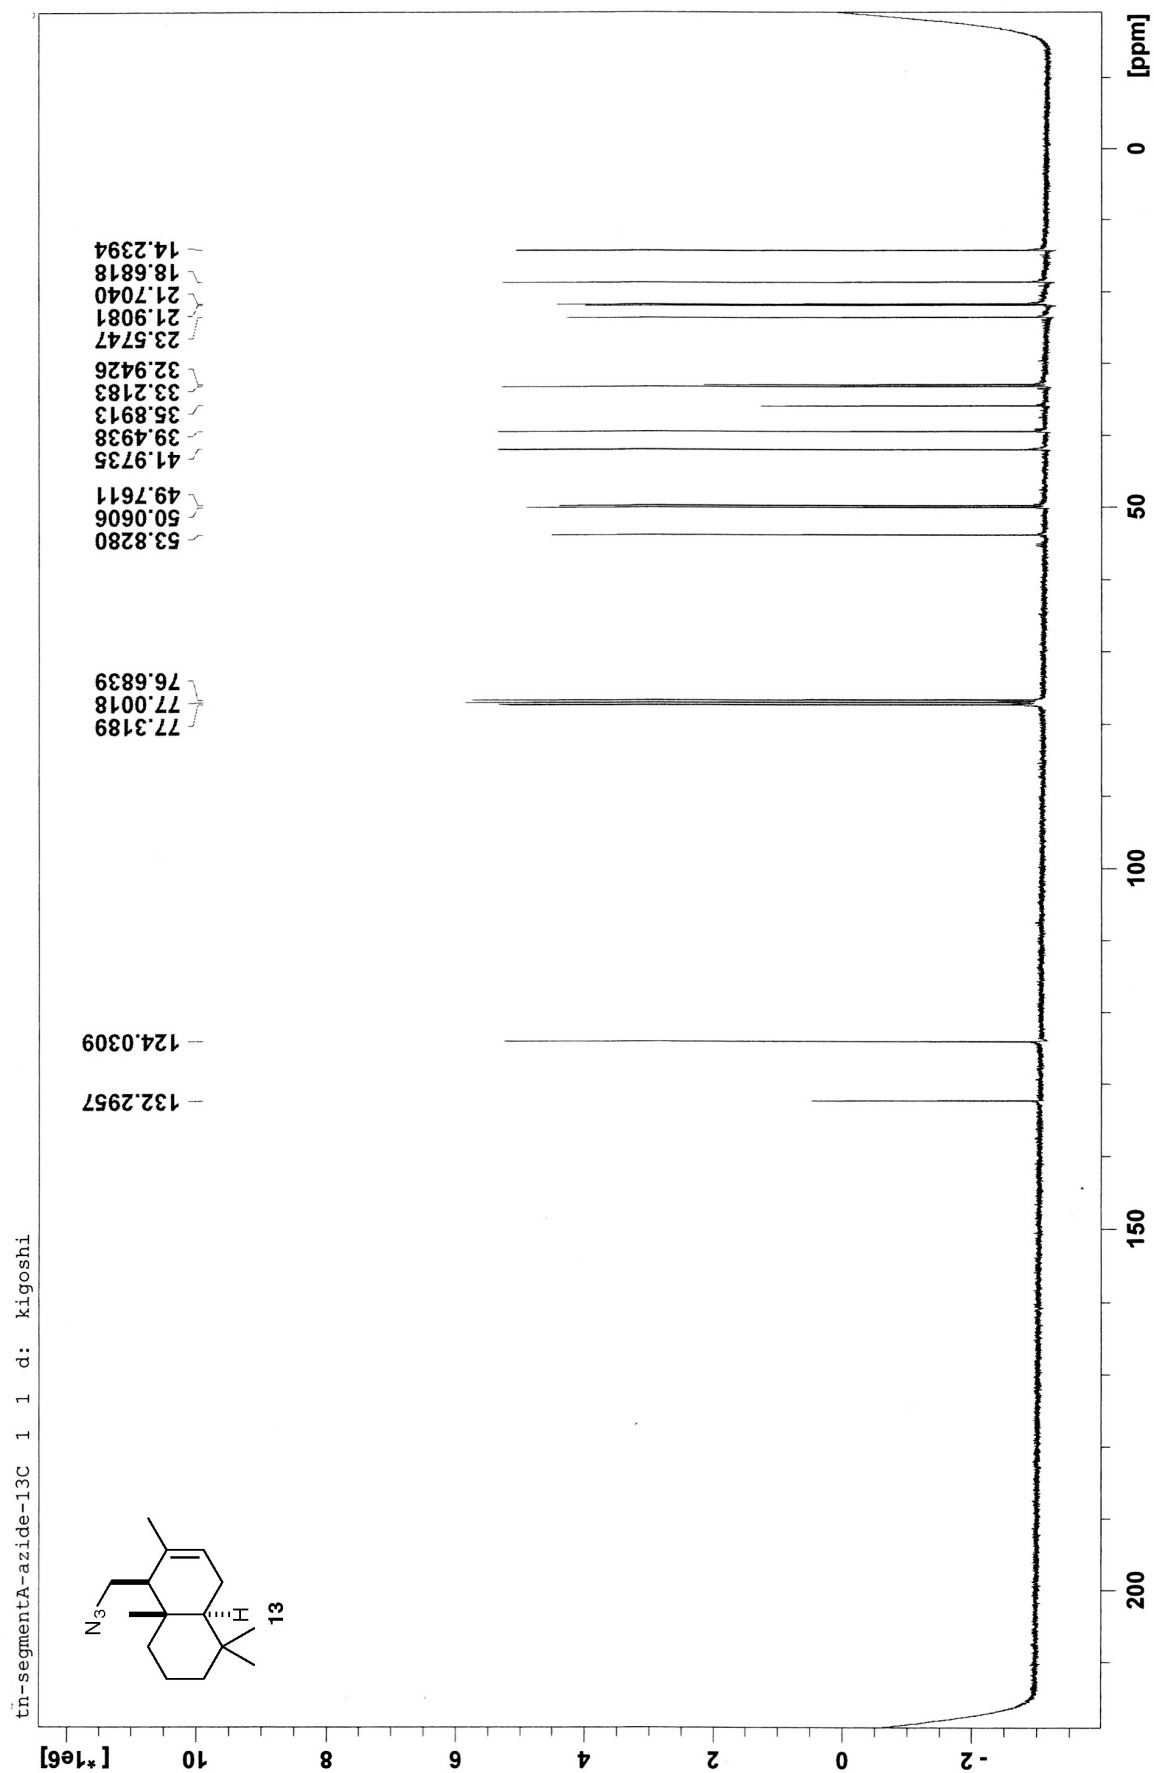

$^{13}\text{C}$  NMR spectra of **13** (100 MHz,  $\text{CDCl}_3$ )

tn-segmentA-1-LH 10 1 D:\kigoshi Kigoshi

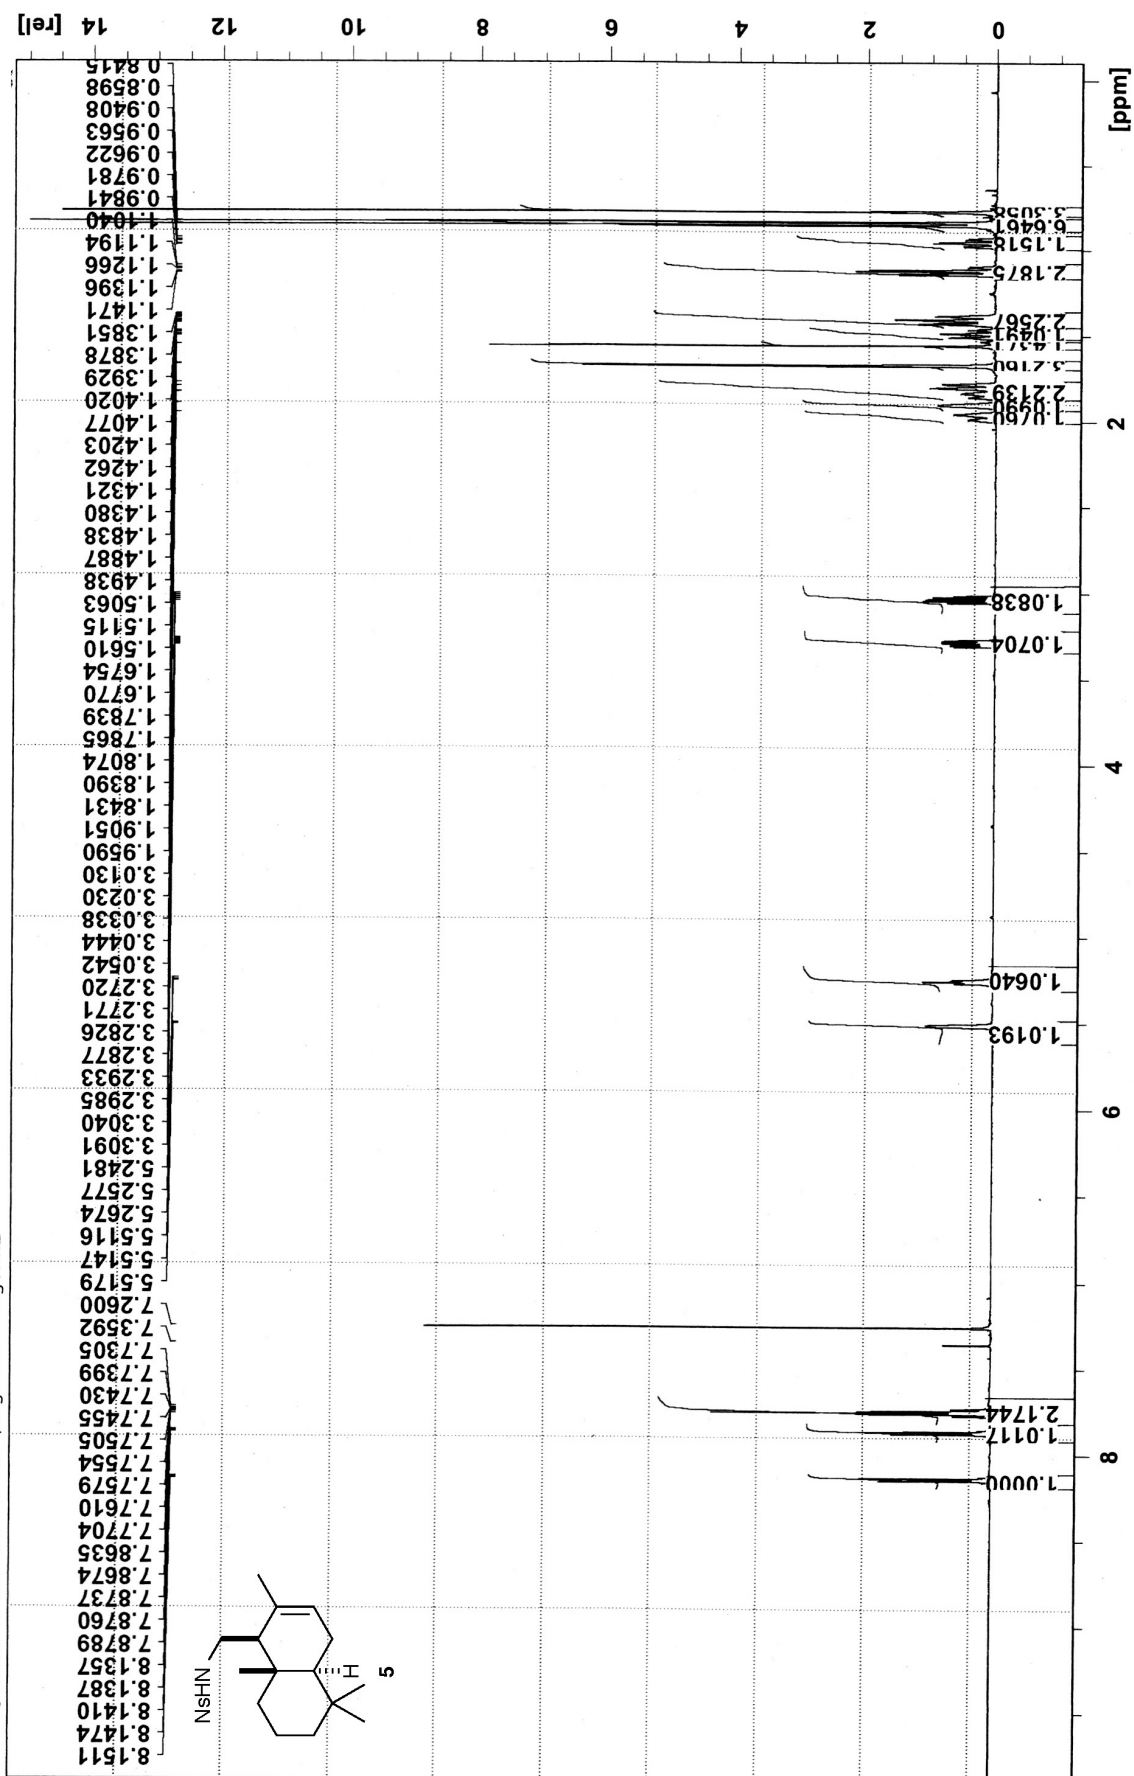

$^1\text{H}$  NMR spectra of **5** (600 MHz,  $\text{CDCl}_3$ )

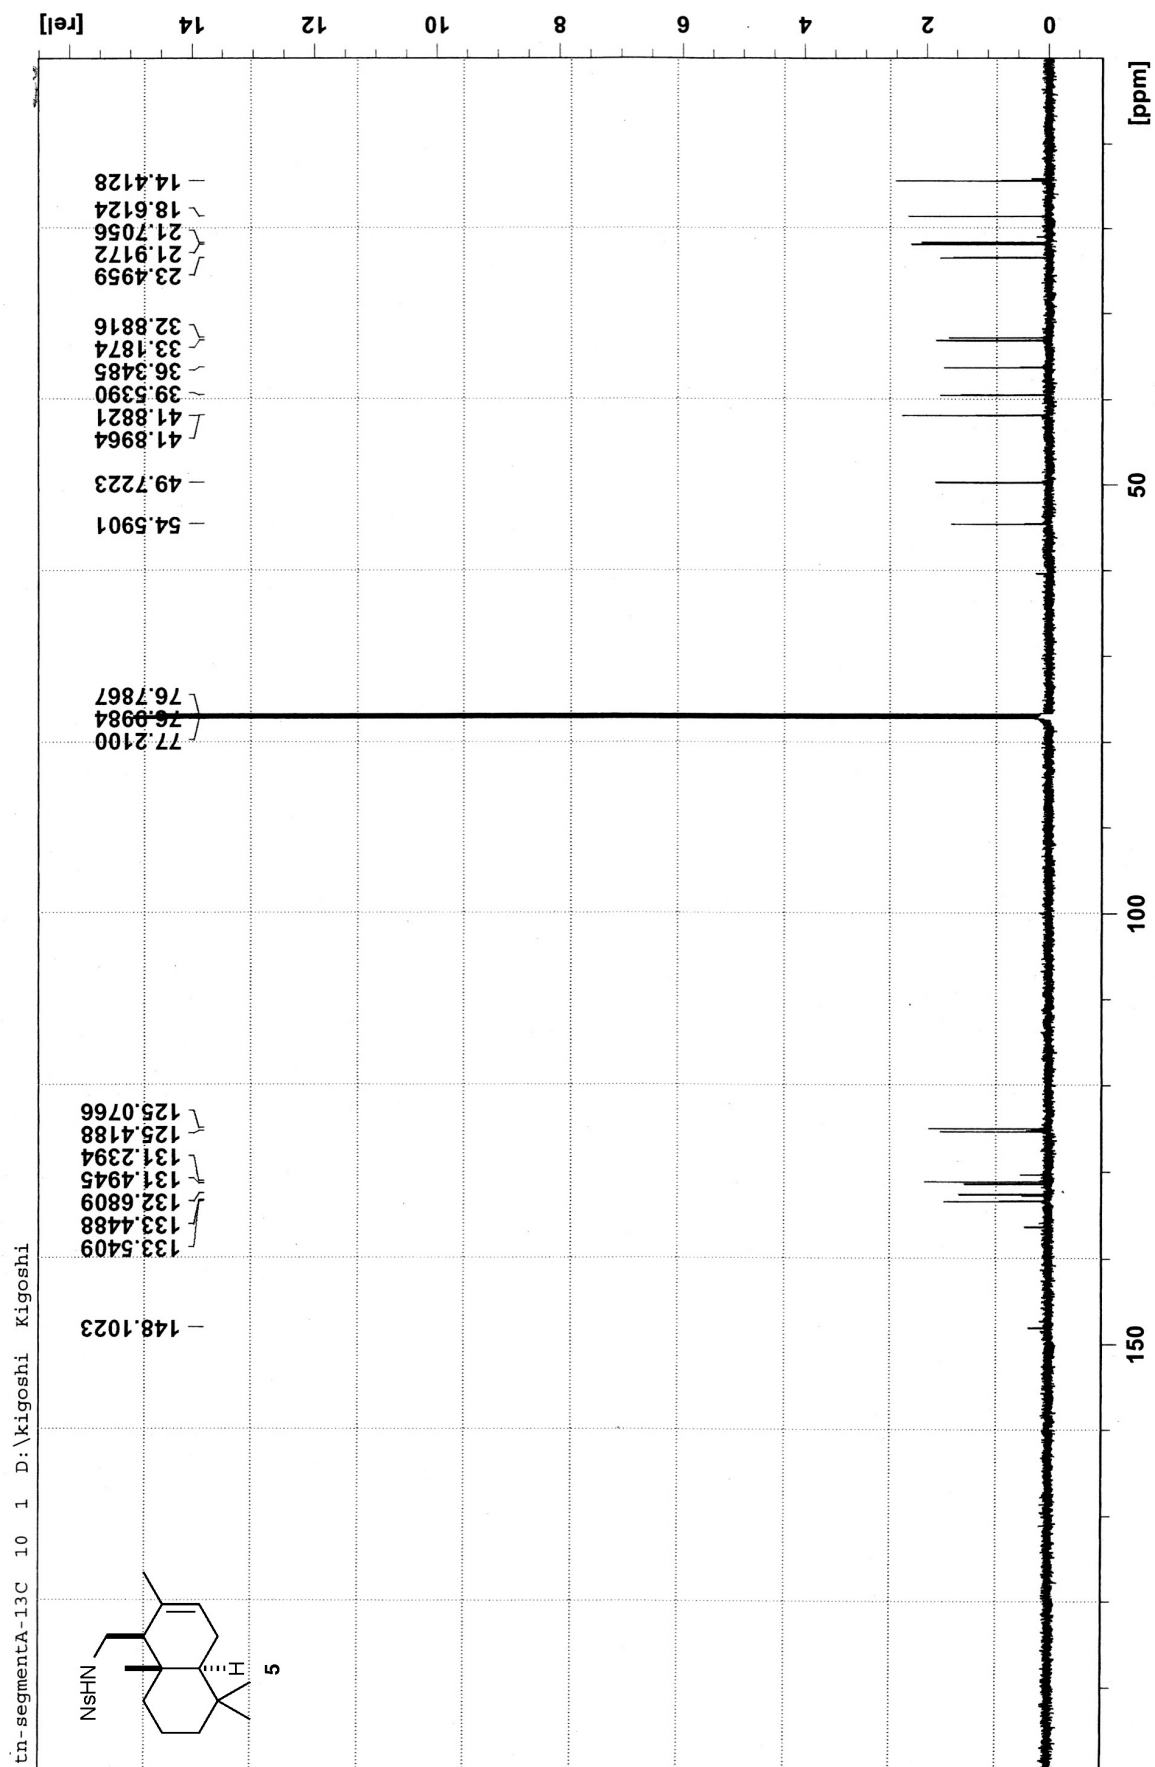

$^{13}\text{C}$  NMR spectra of **5** (150 MHz,  $\text{CDCl}_3$ )

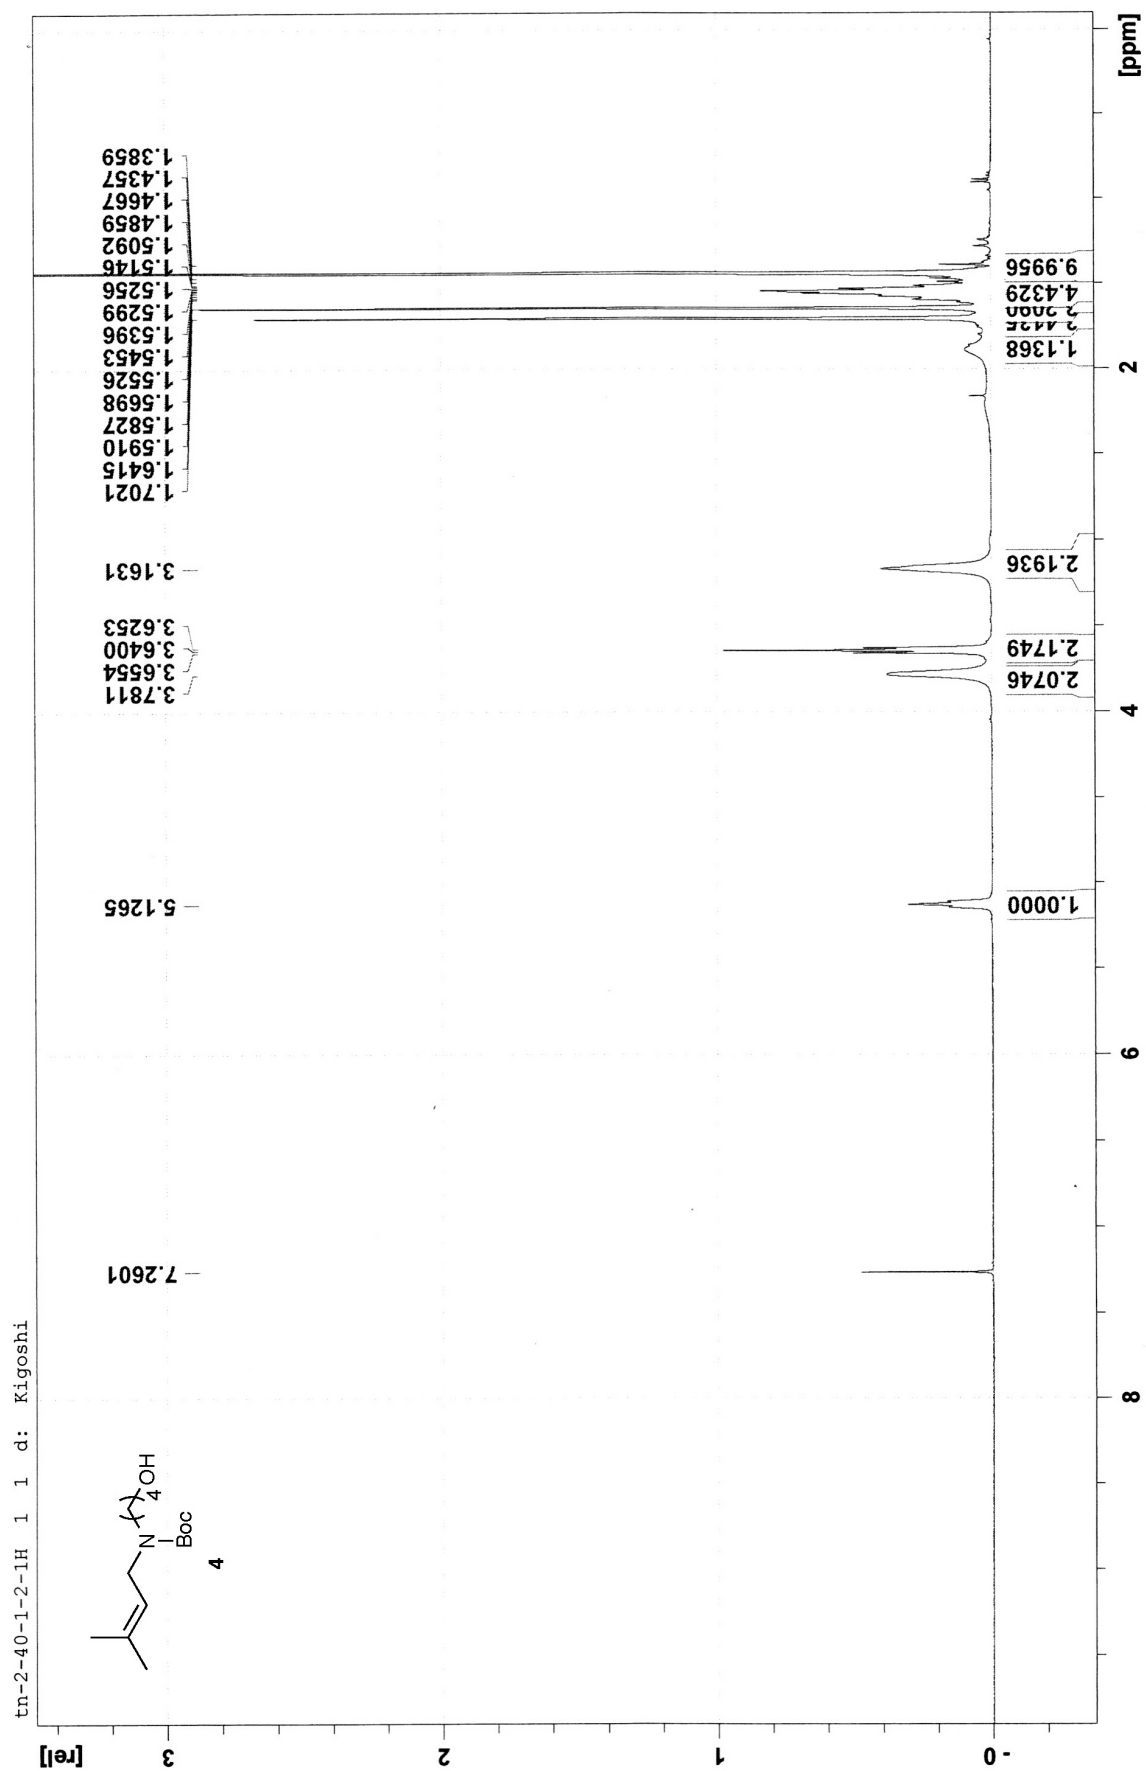

$^1\text{H}$  NMR spectra of **4** (400 MHz,  $\text{CDCl}_3$ )

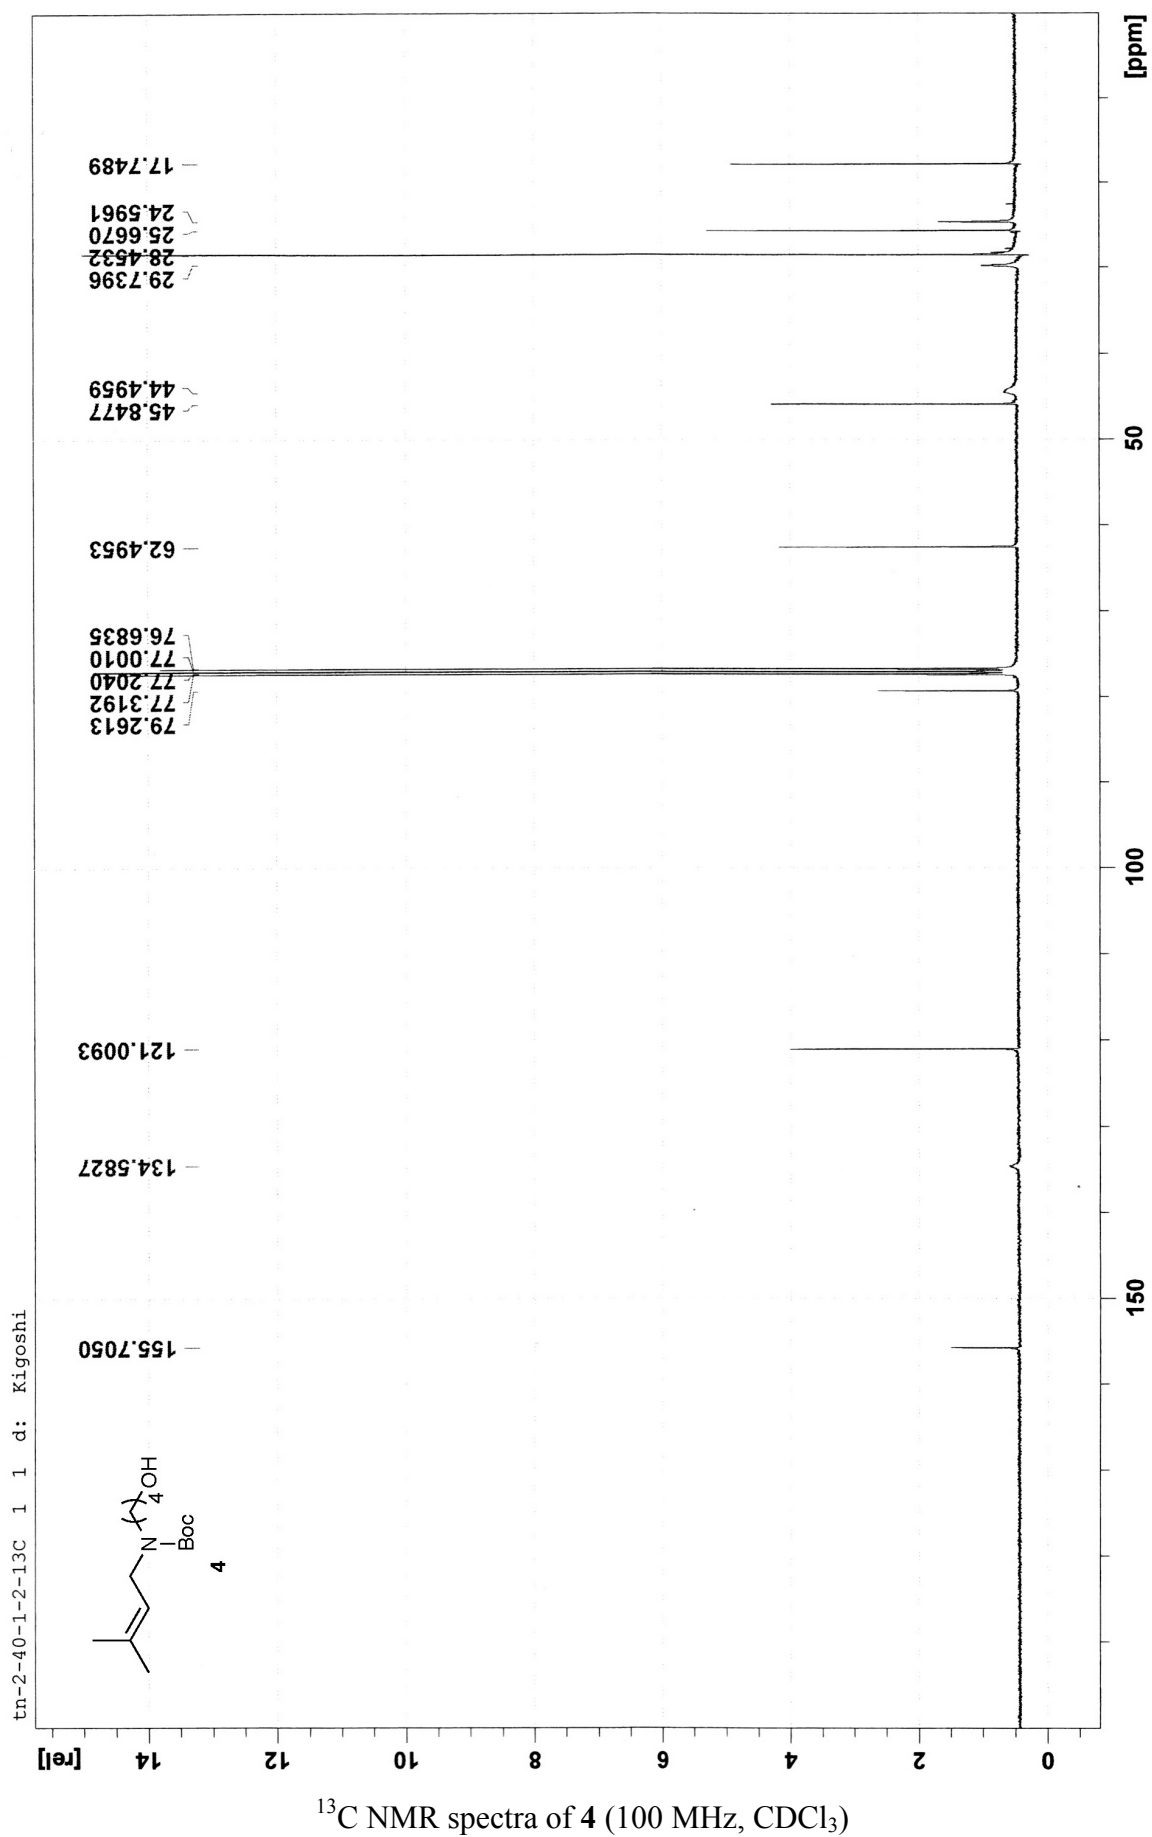

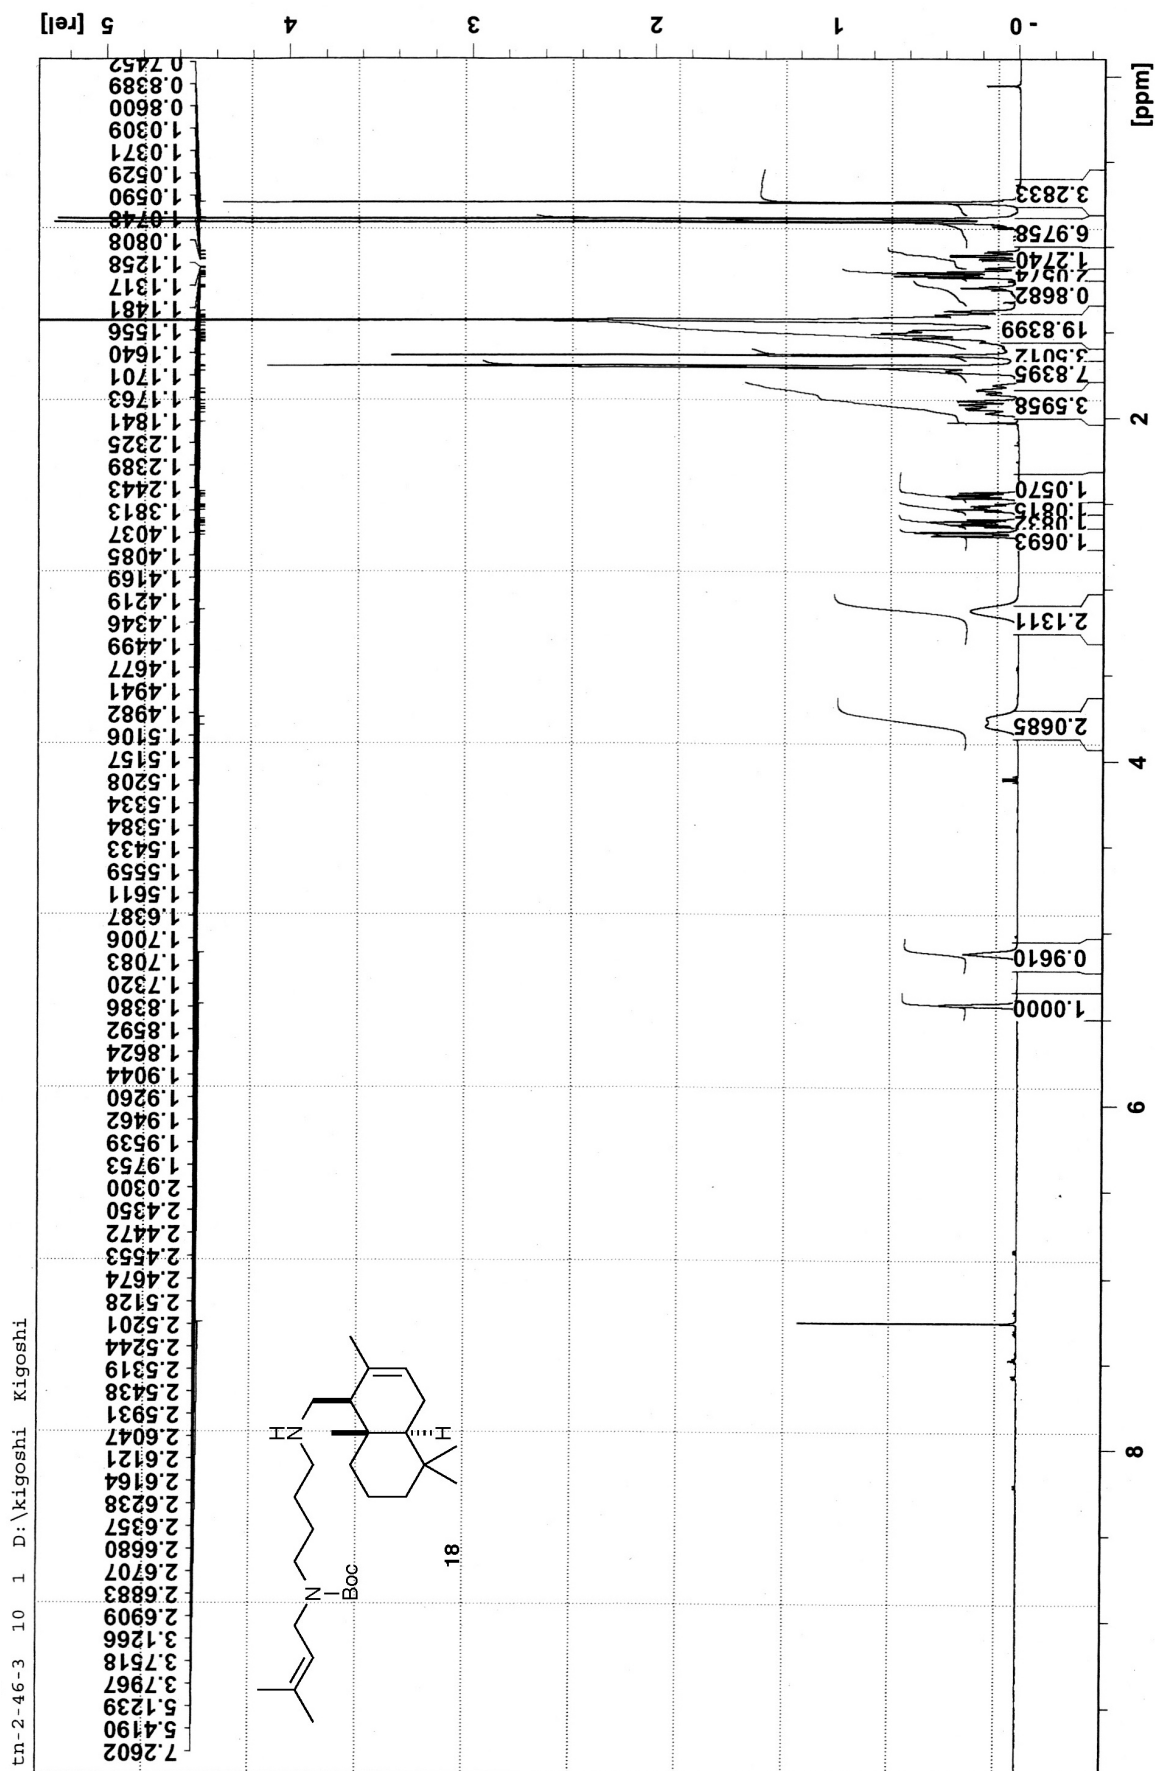

<sup>1</sup>H NMR spectra of **18** (600 MHz, CDCl<sub>3</sub>)



tn-2-46-3-13C 10 1 D:\kigoshi Kigoshi

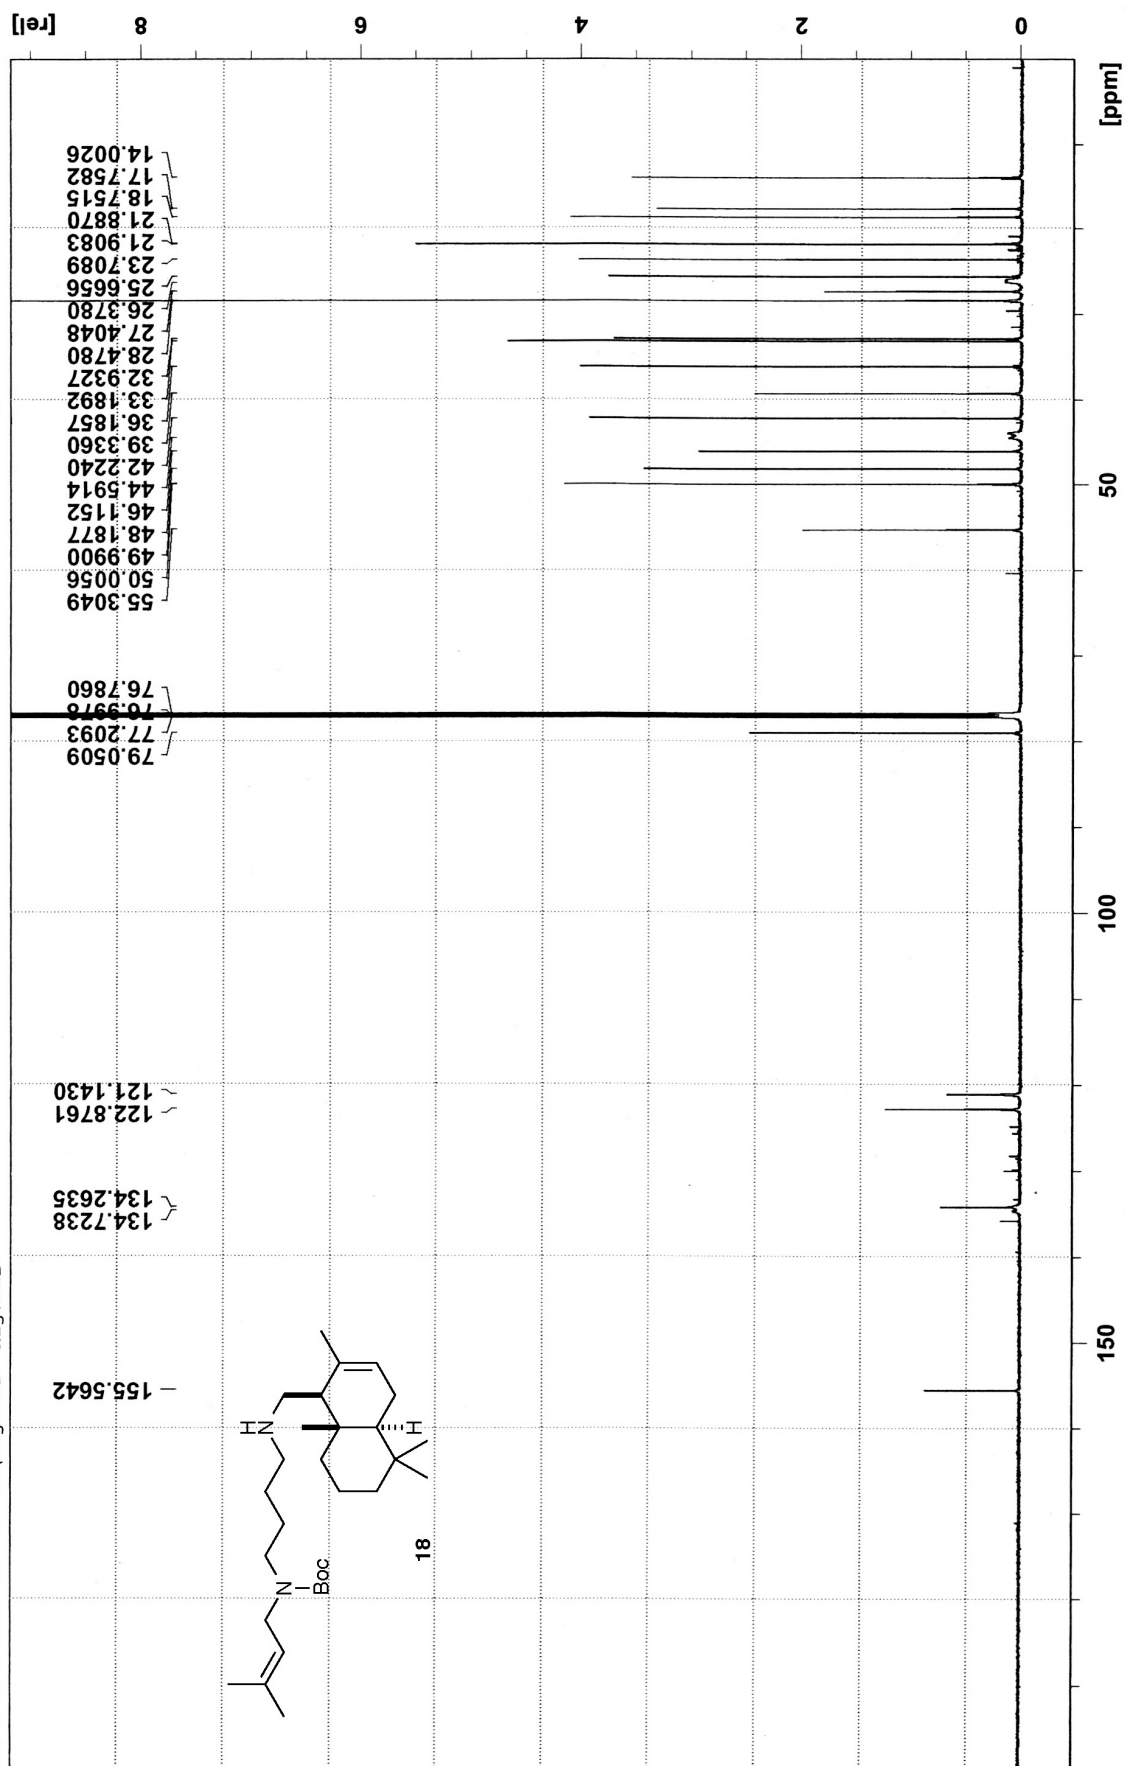

<sup>13</sup>C NMR spectra of **18** (150 MHz, CDCl<sub>3</sub>)

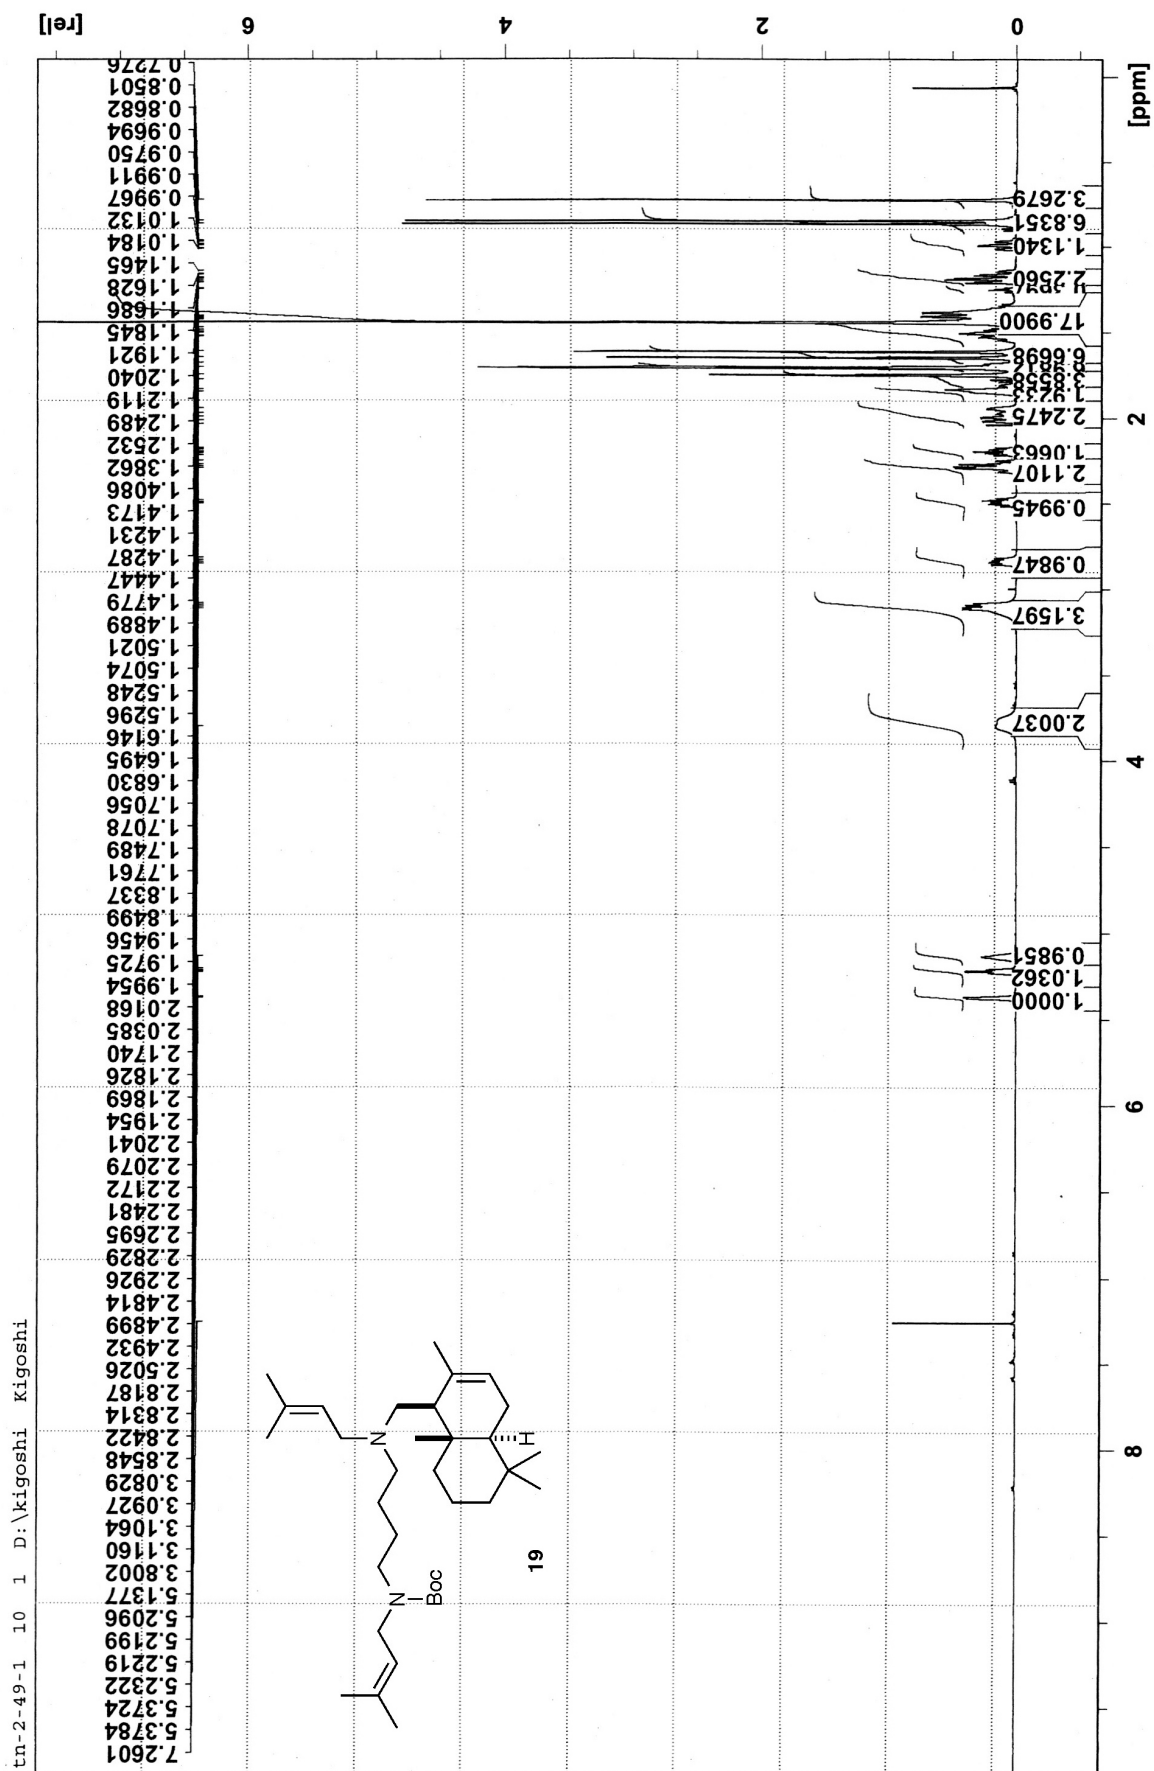

<sup>1</sup>H NMR spectra of **19** (600 MHz, CDCl<sub>3</sub>)

tn-2-49-1-13C 10 1 D:\kigoshi Kigoshi

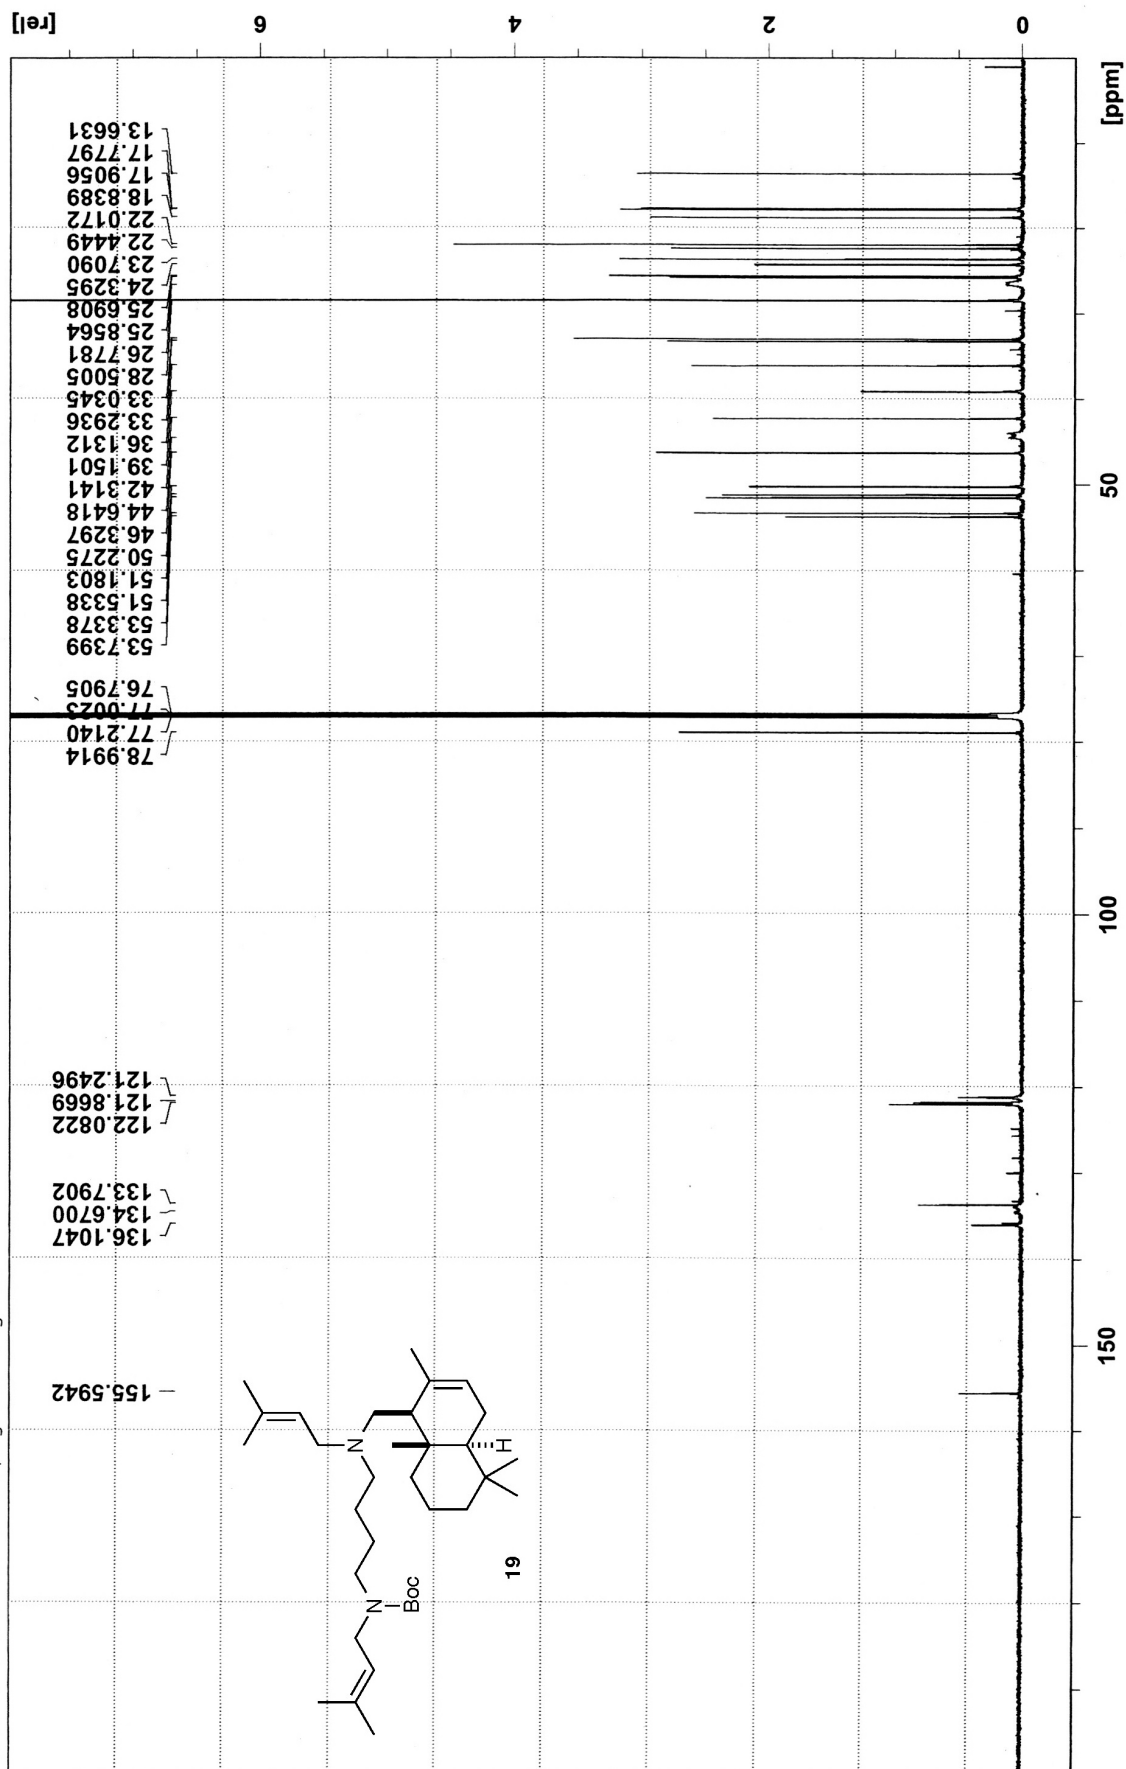

$^{13}\text{C}$  NMR spectra of **19** (150 MHz,  $\text{CDCl}_3$ )

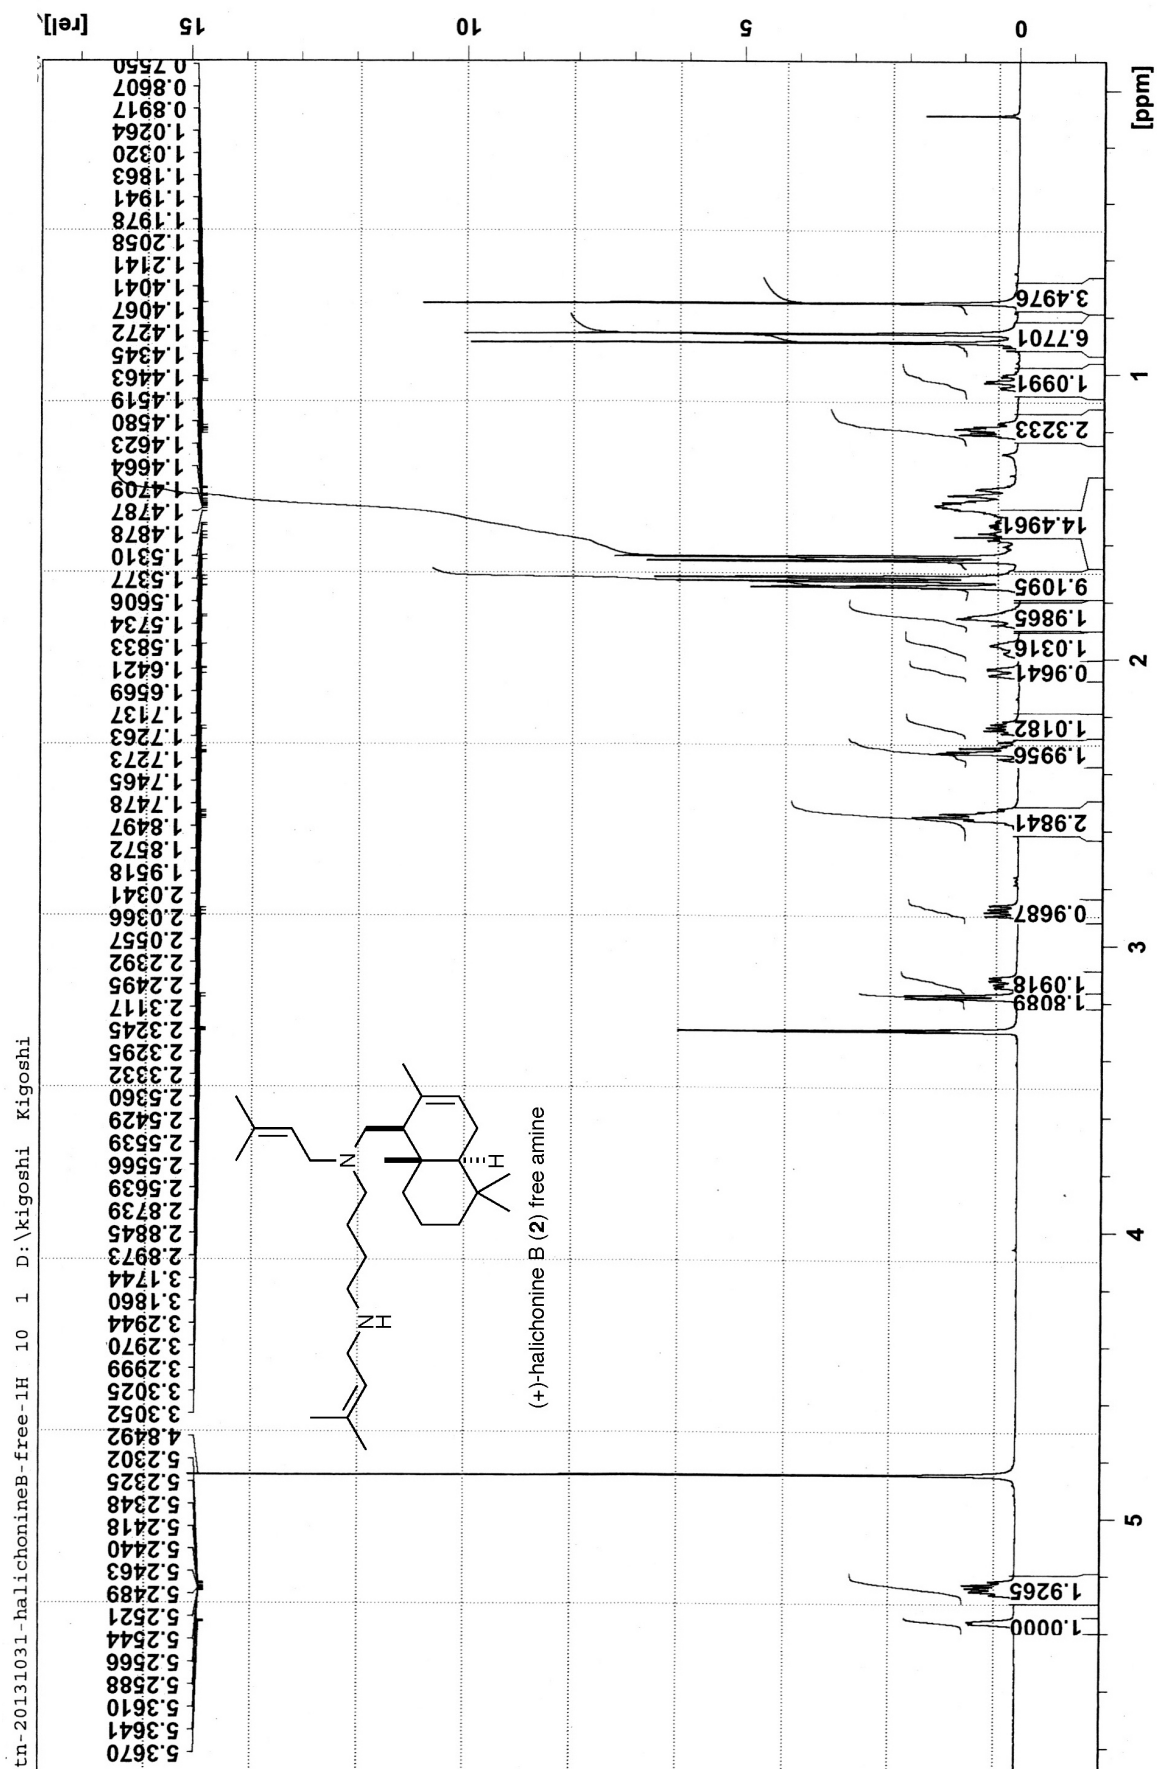

<sup>1</sup>H NMR spectra of (+)-halichonine B (2) free amine (600 MHz, CD<sub>3</sub>OD)

tn-20131031-halichonineB-free-13C 10 1 D:\kigoshi Kigoshi

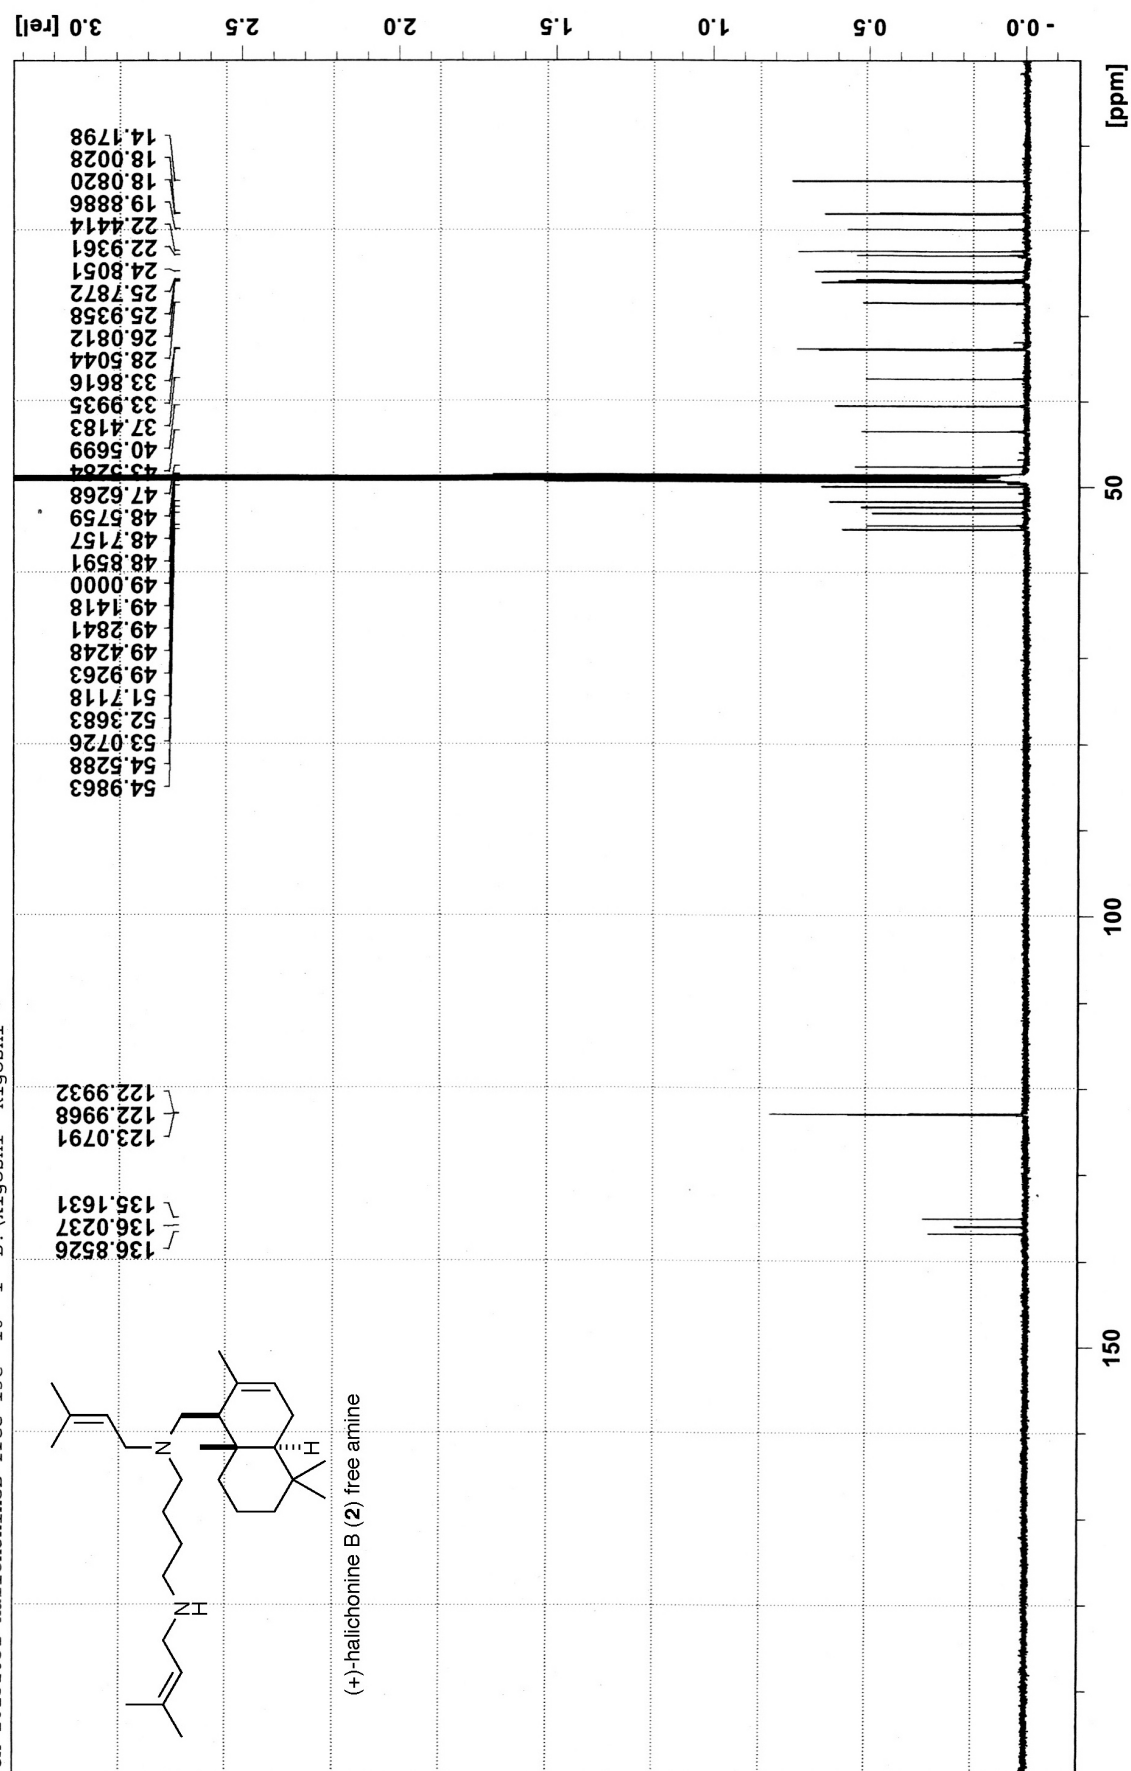

<sup>13</sup>C NMR spectra of (+)-halichonine B (2) free amine (150 MHz, CD<sub>3</sub>OD)

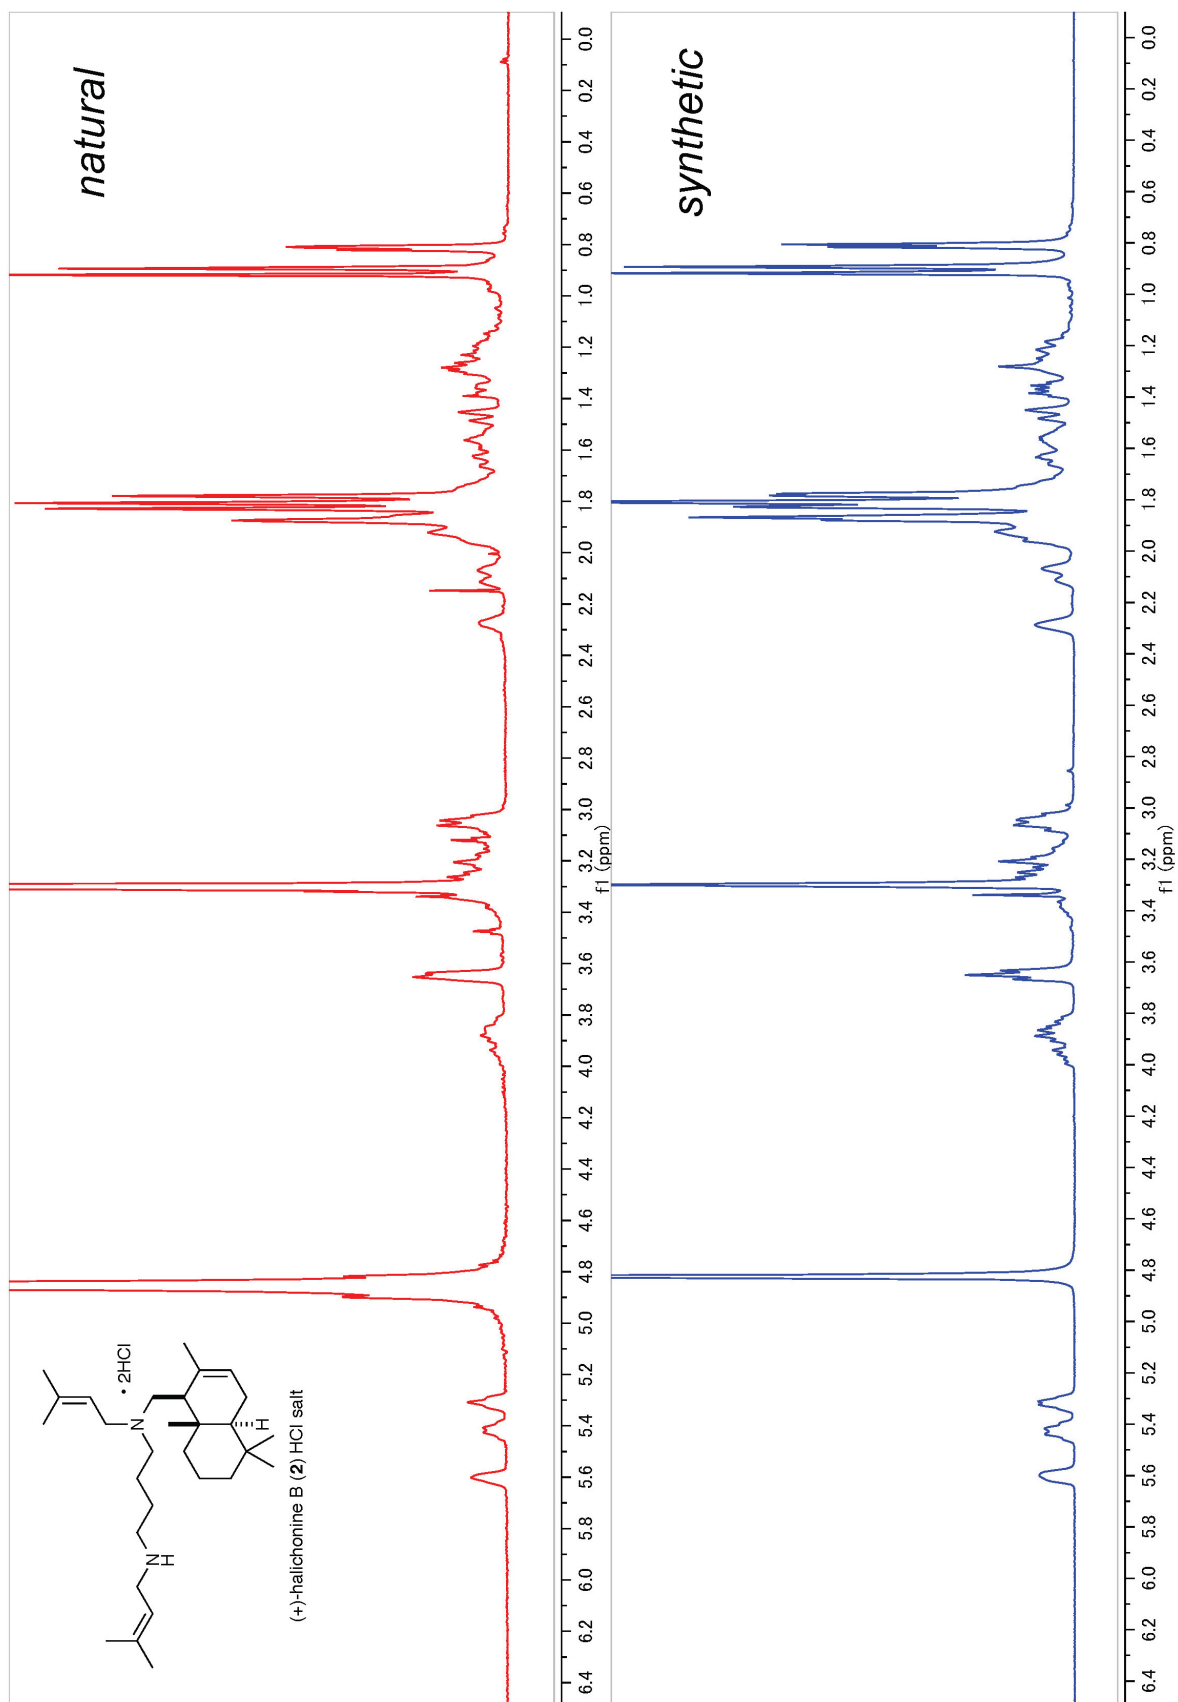

$^1\text{H}$  NMR spectra of (+)-halichonine B (**2**) HCl salt (400 MHz,  $\text{CD}_3\text{OD}$ )

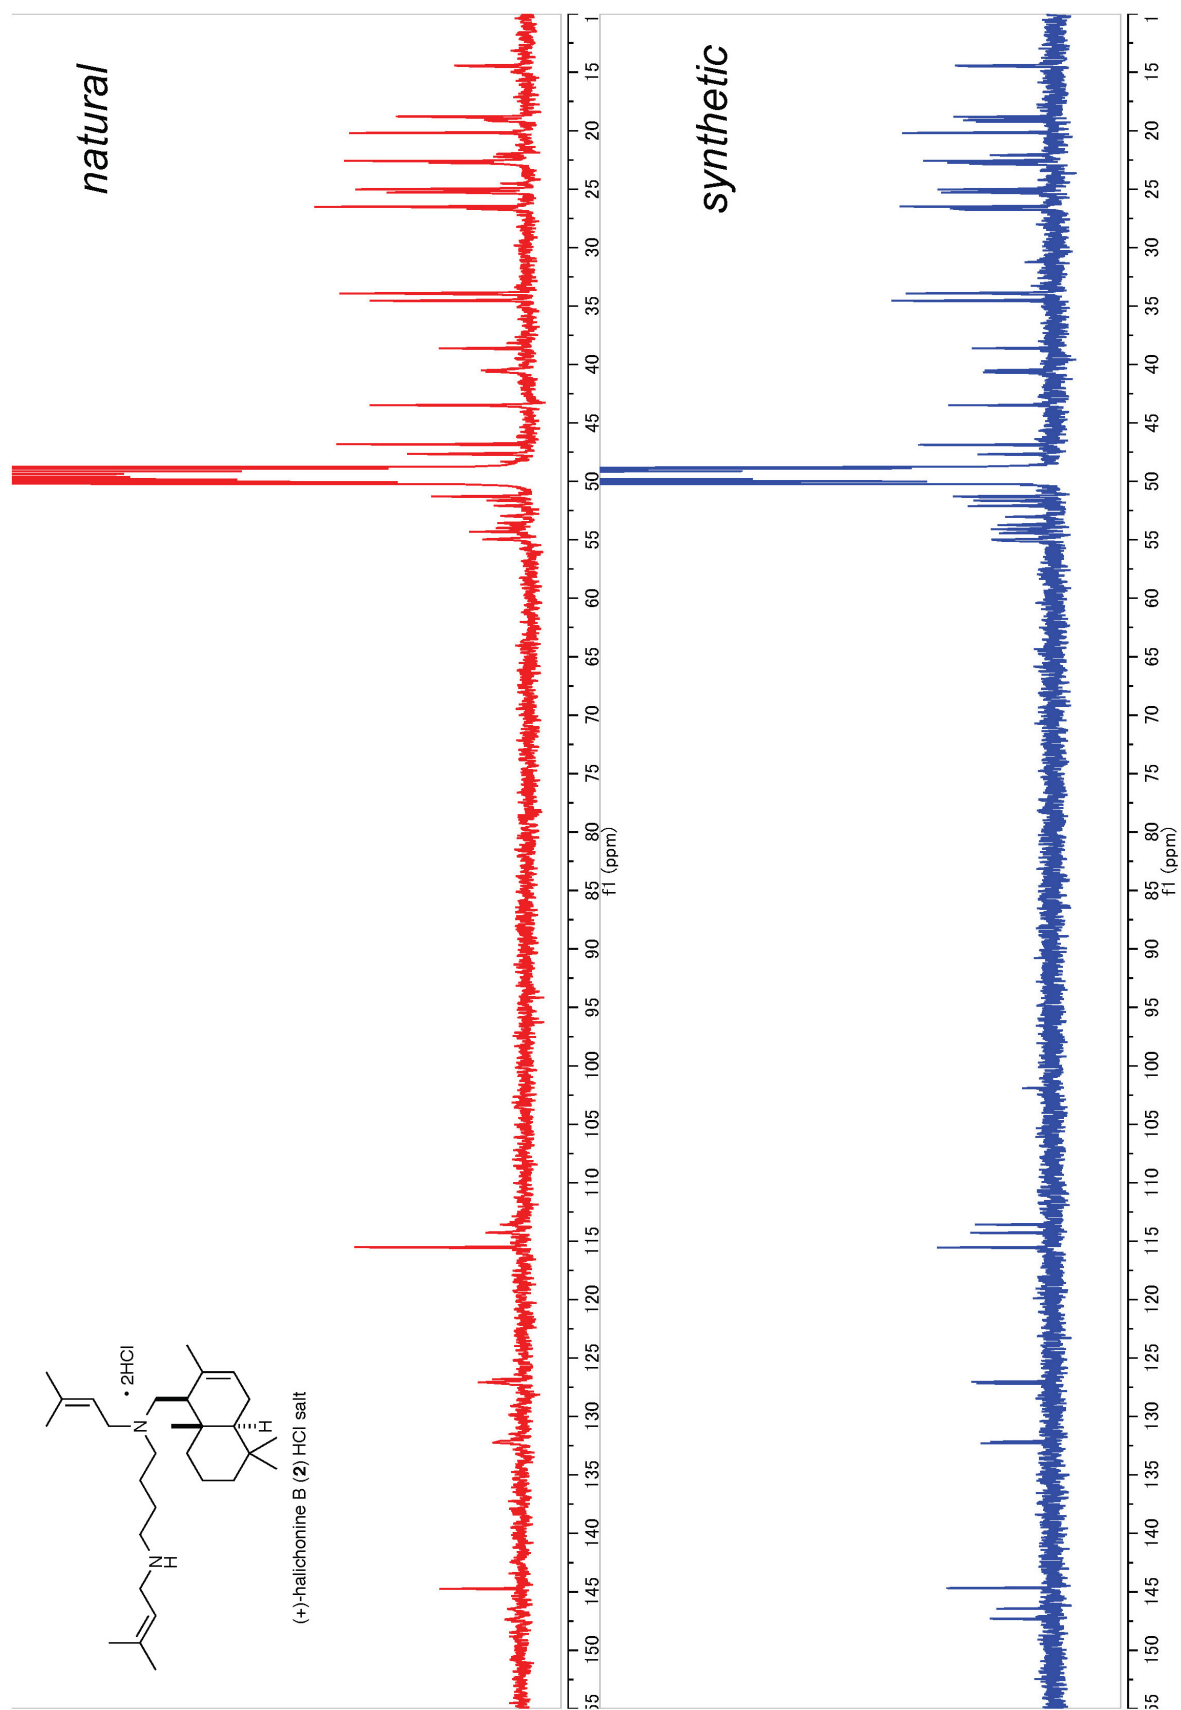

$^{13}\text{C}$  NMR spectra of (+)-halichonine B (**2**) HCl salt (100 MHz,  $\text{CD}_3\text{OD}$ )

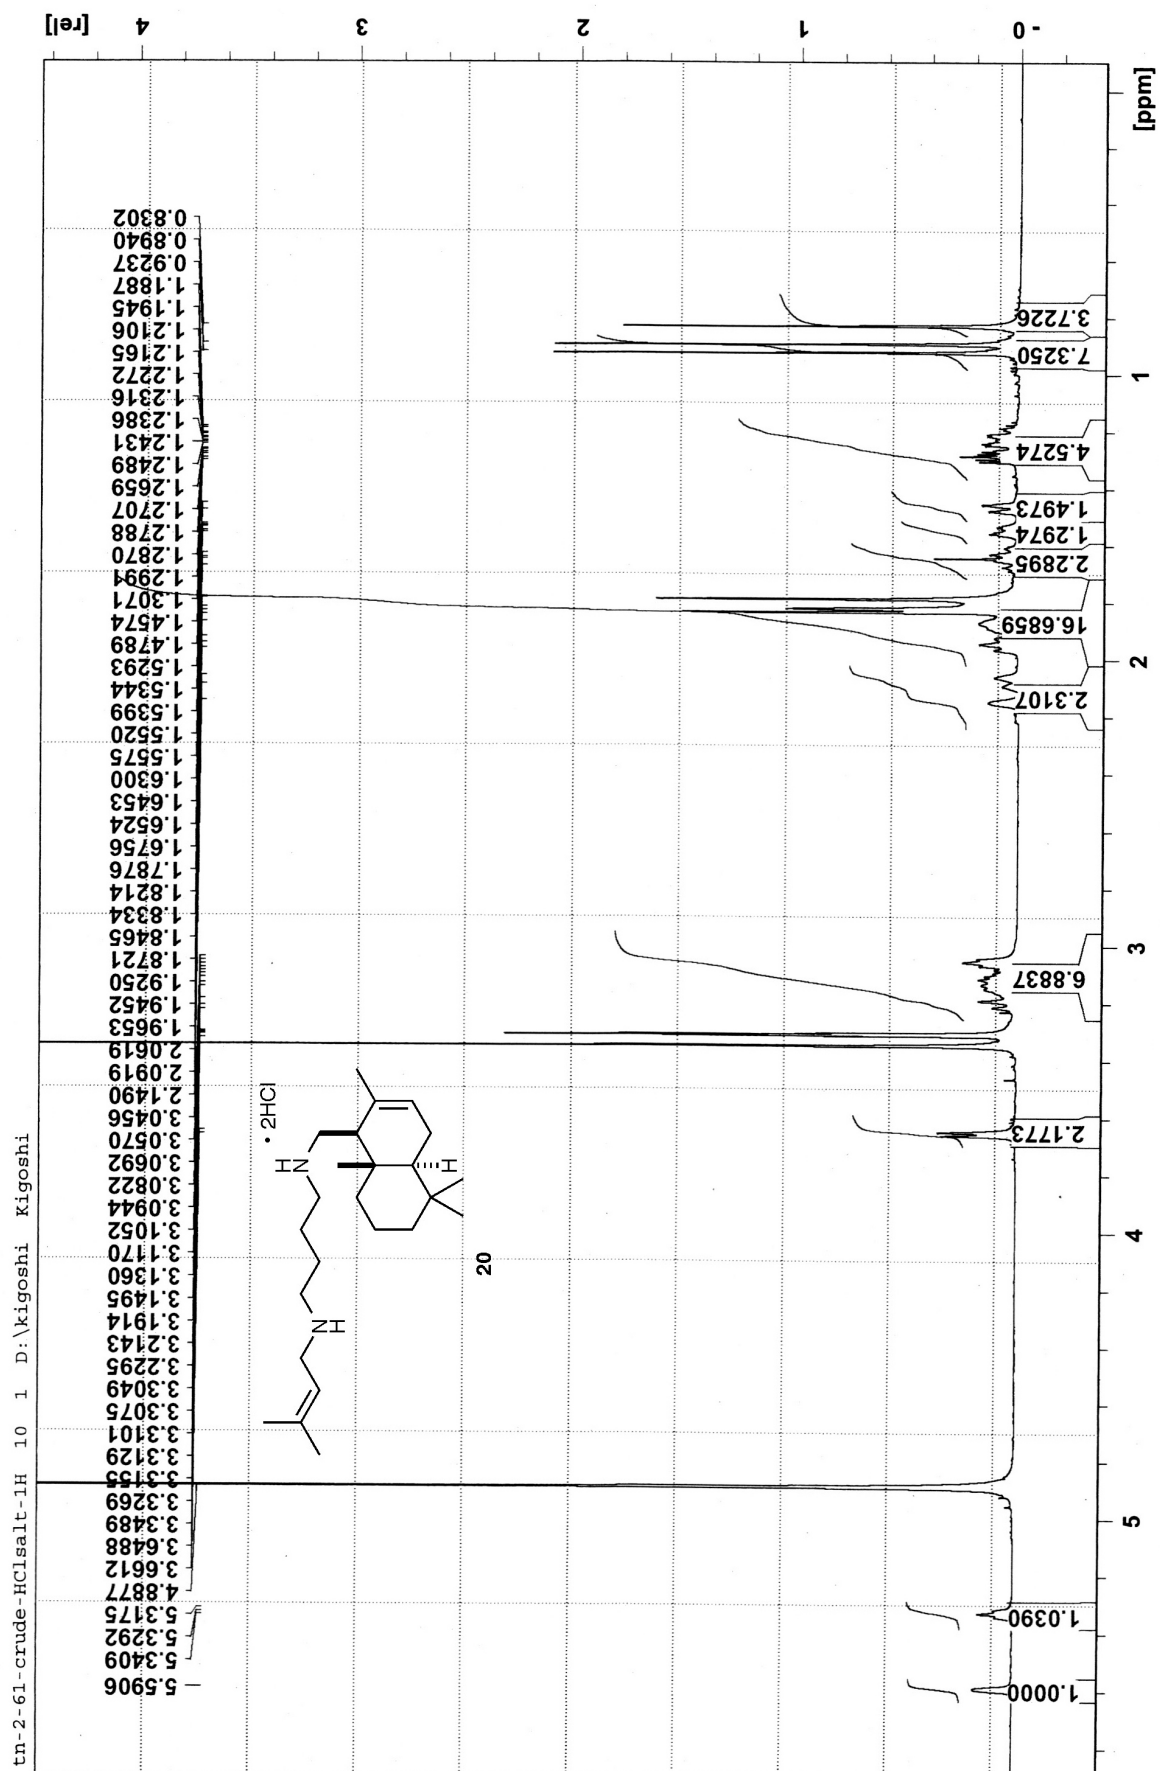

$^1\text{H}$  NMR spectra of **20** (600 MHz,  $\text{CD}_3\text{OD}$ )



tn-2-61-crude-HClSalt-13C 10 1 D:\kigoshi Kigoshi

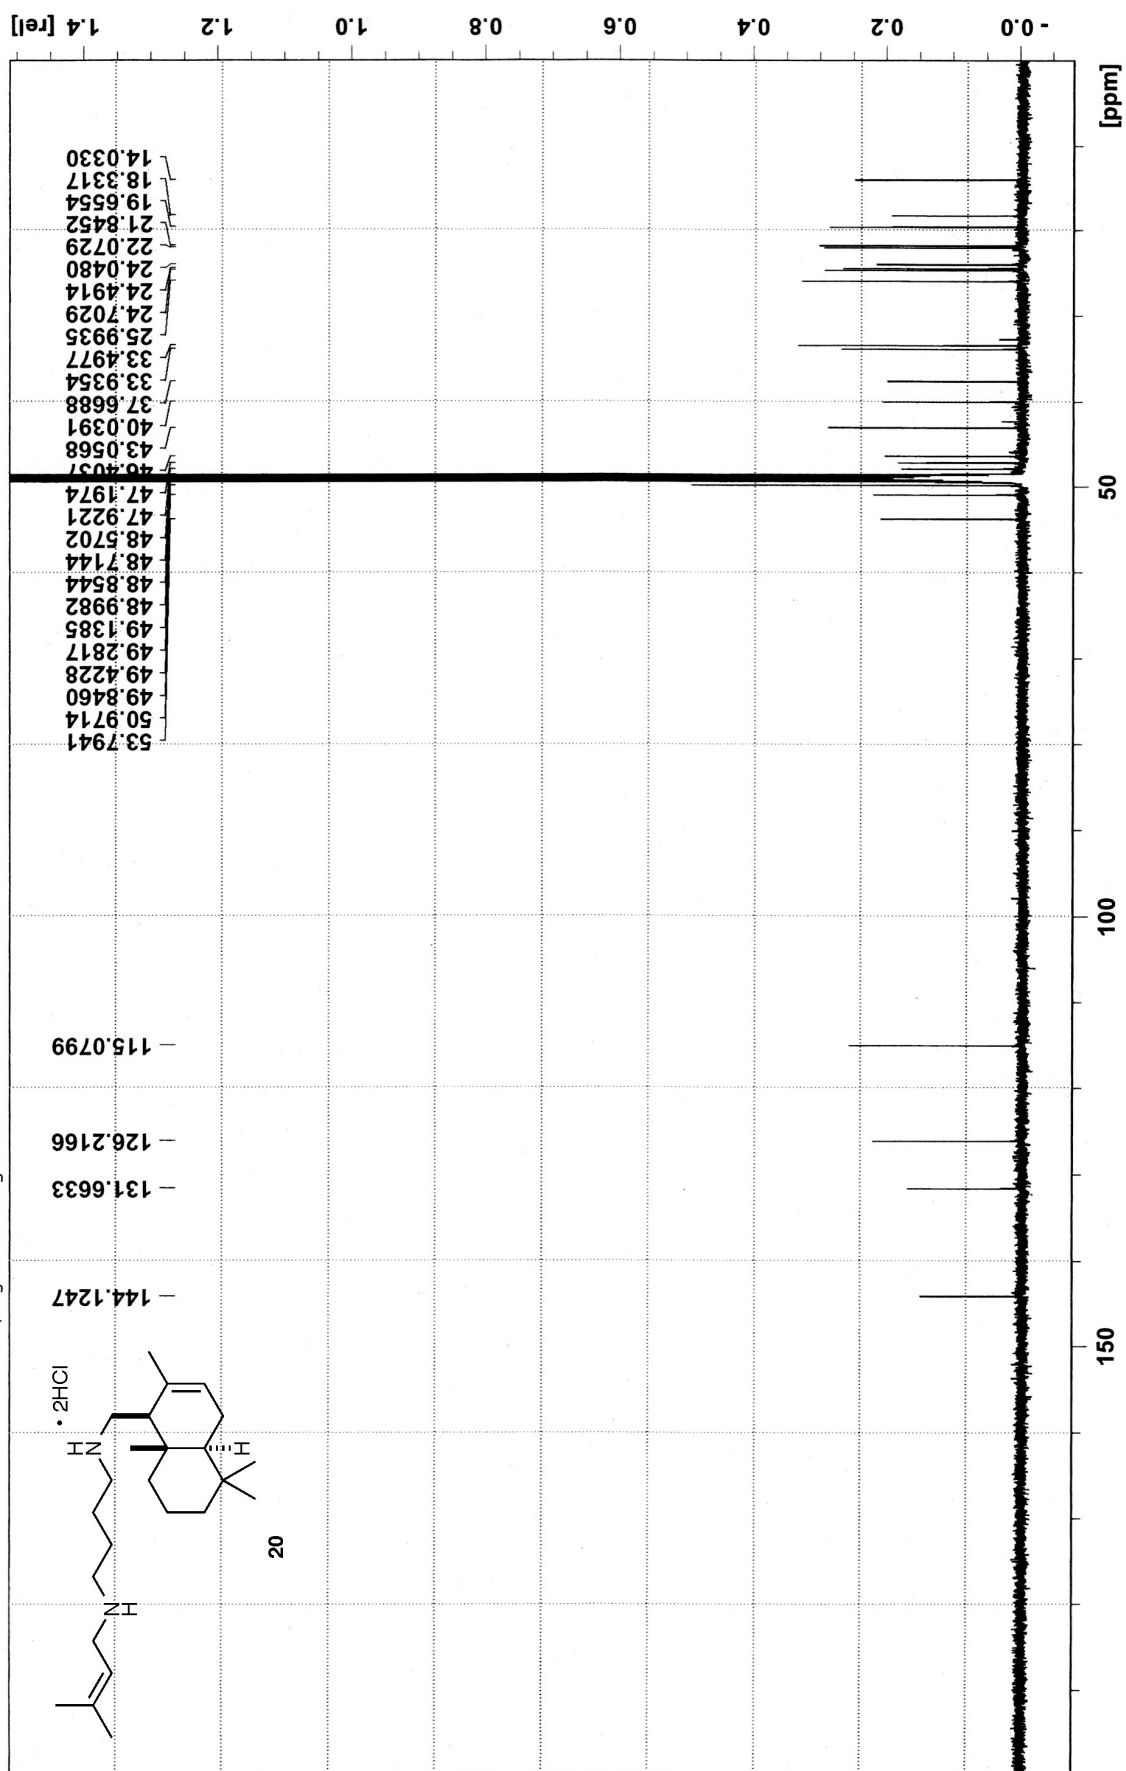

$^{13}\text{C}$  NMR spectra of **20** (150 MHz,  $\text{CD}_3\text{OD}$ )

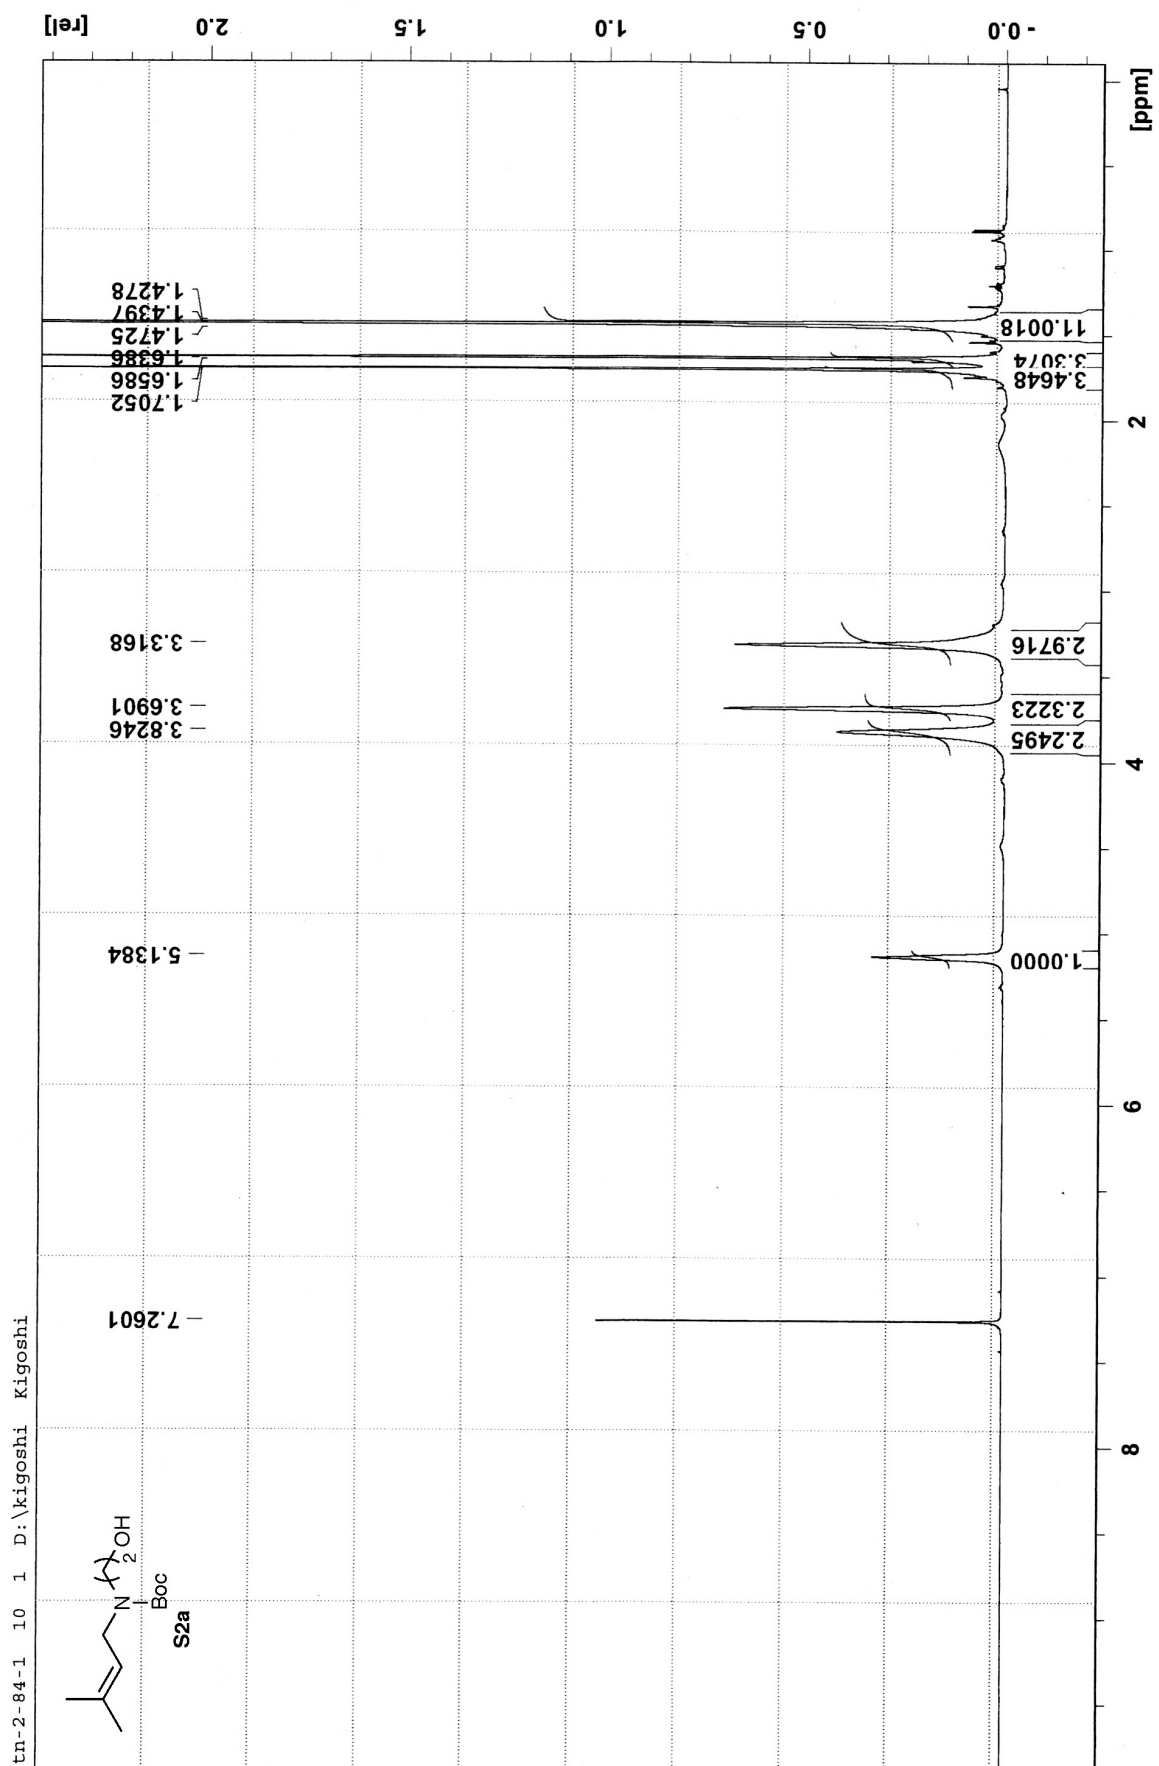<sup>1</sup>H NMR spectra of **S2a** (600 MHz, CDCl<sub>3</sub>)

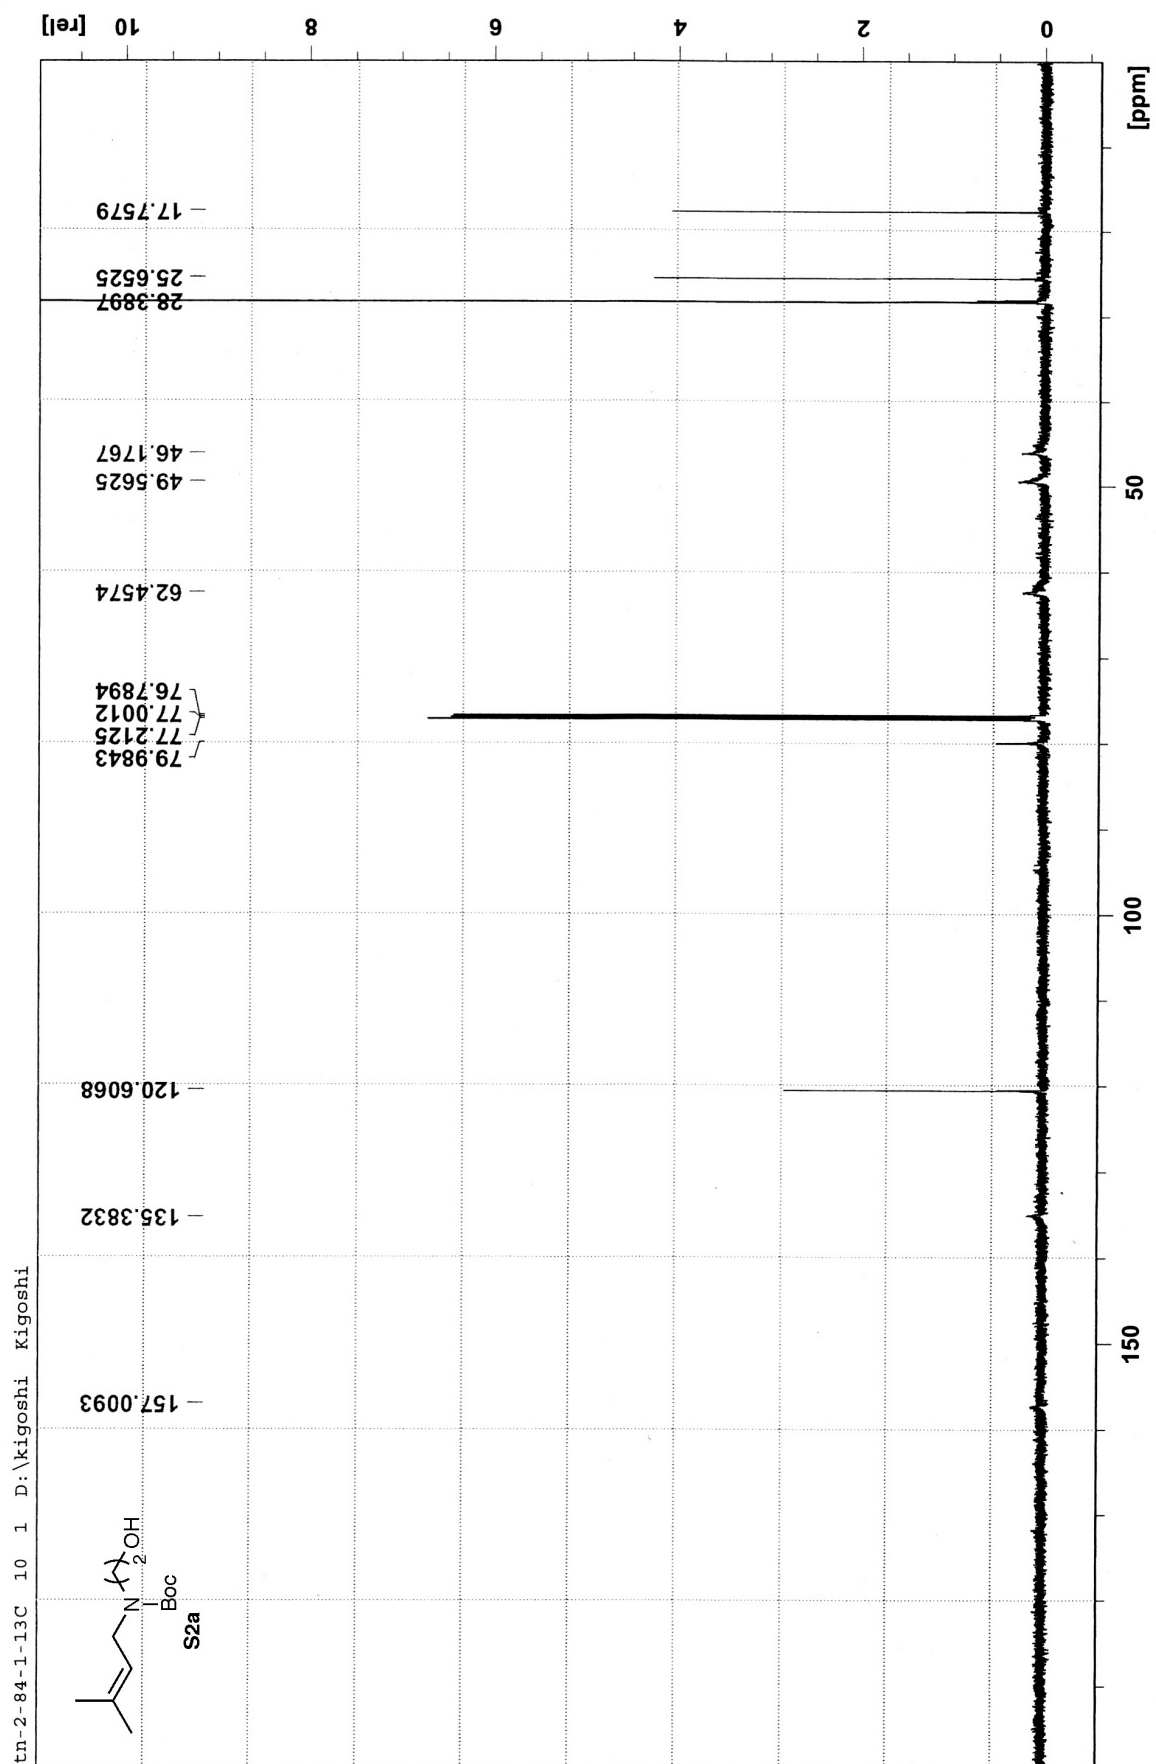

$^{13}\text{C}$  NMR spectra of **S2a** (150 MHz,  $\text{CDCl}_3$ )

tn-2-64-1-1H 10 1 D:\kigoshi Kigoshi

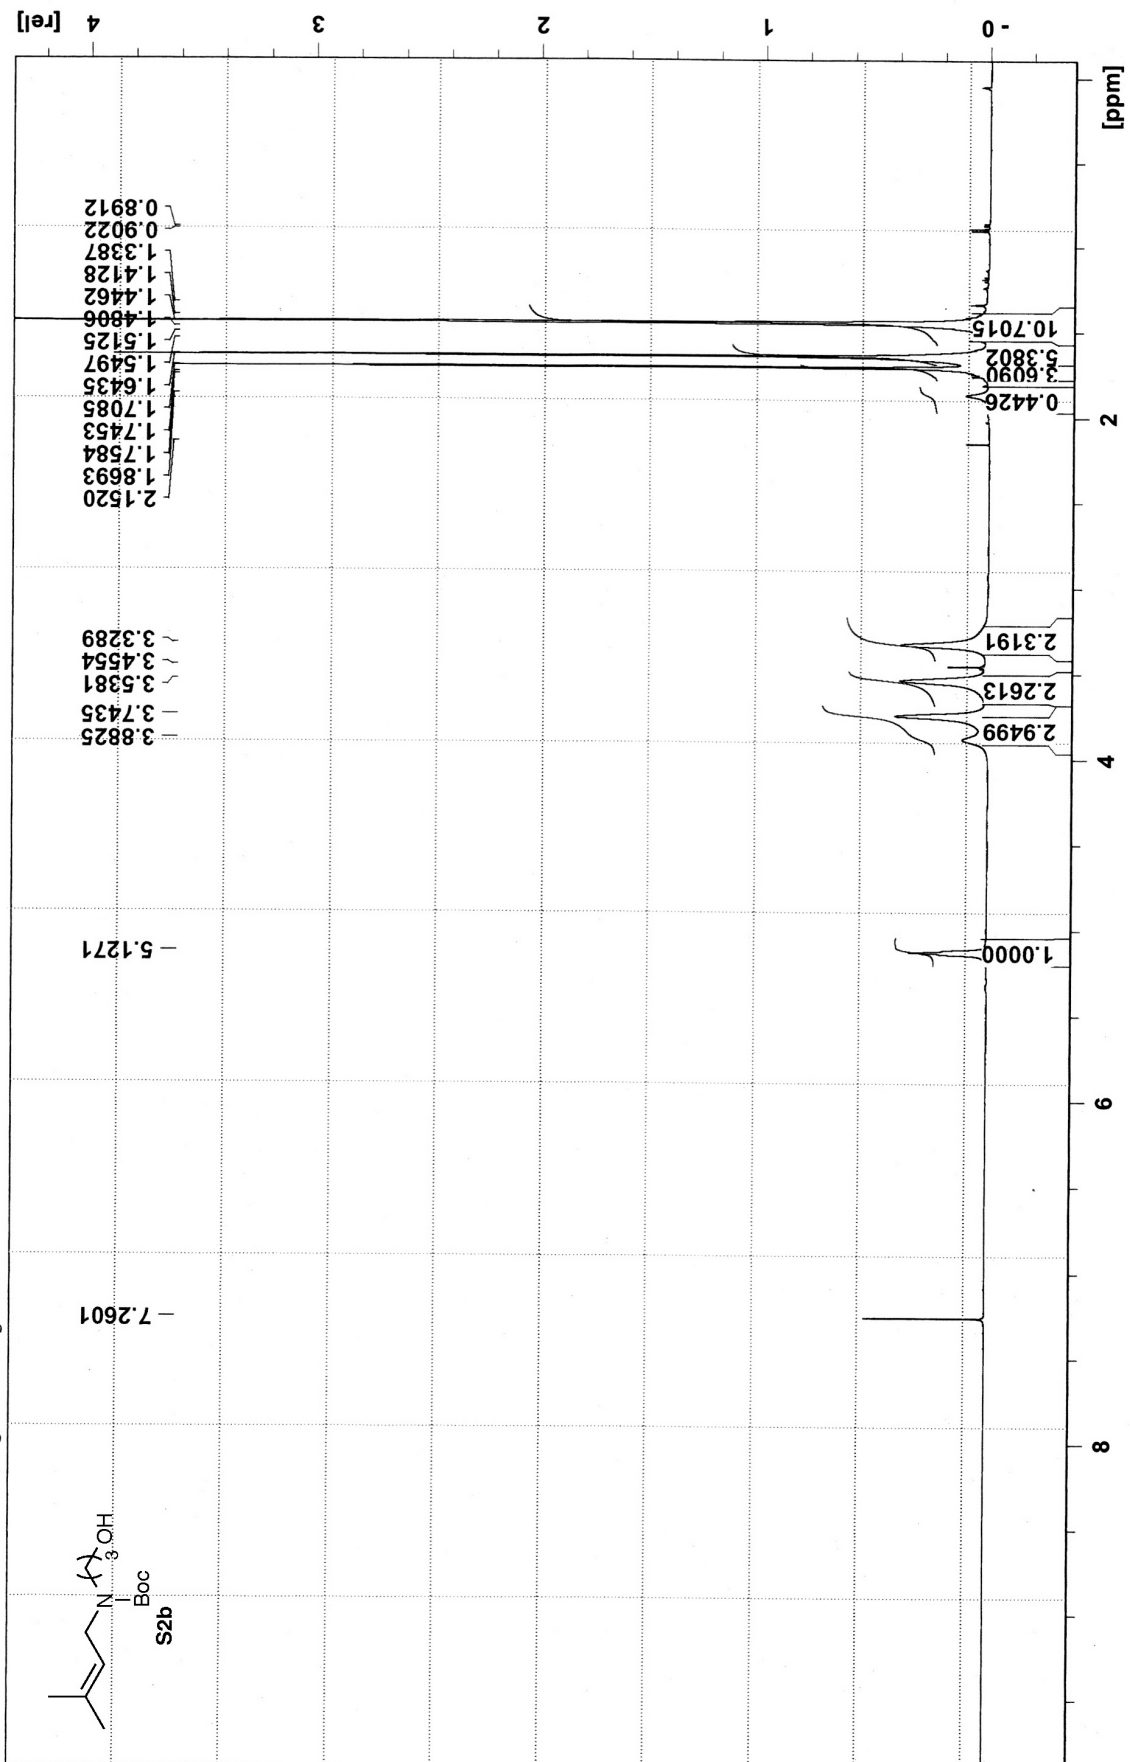

$^1\text{H}$  NMR spectra of **S2b** (600 MHz,  $\text{CDCl}_3$ )

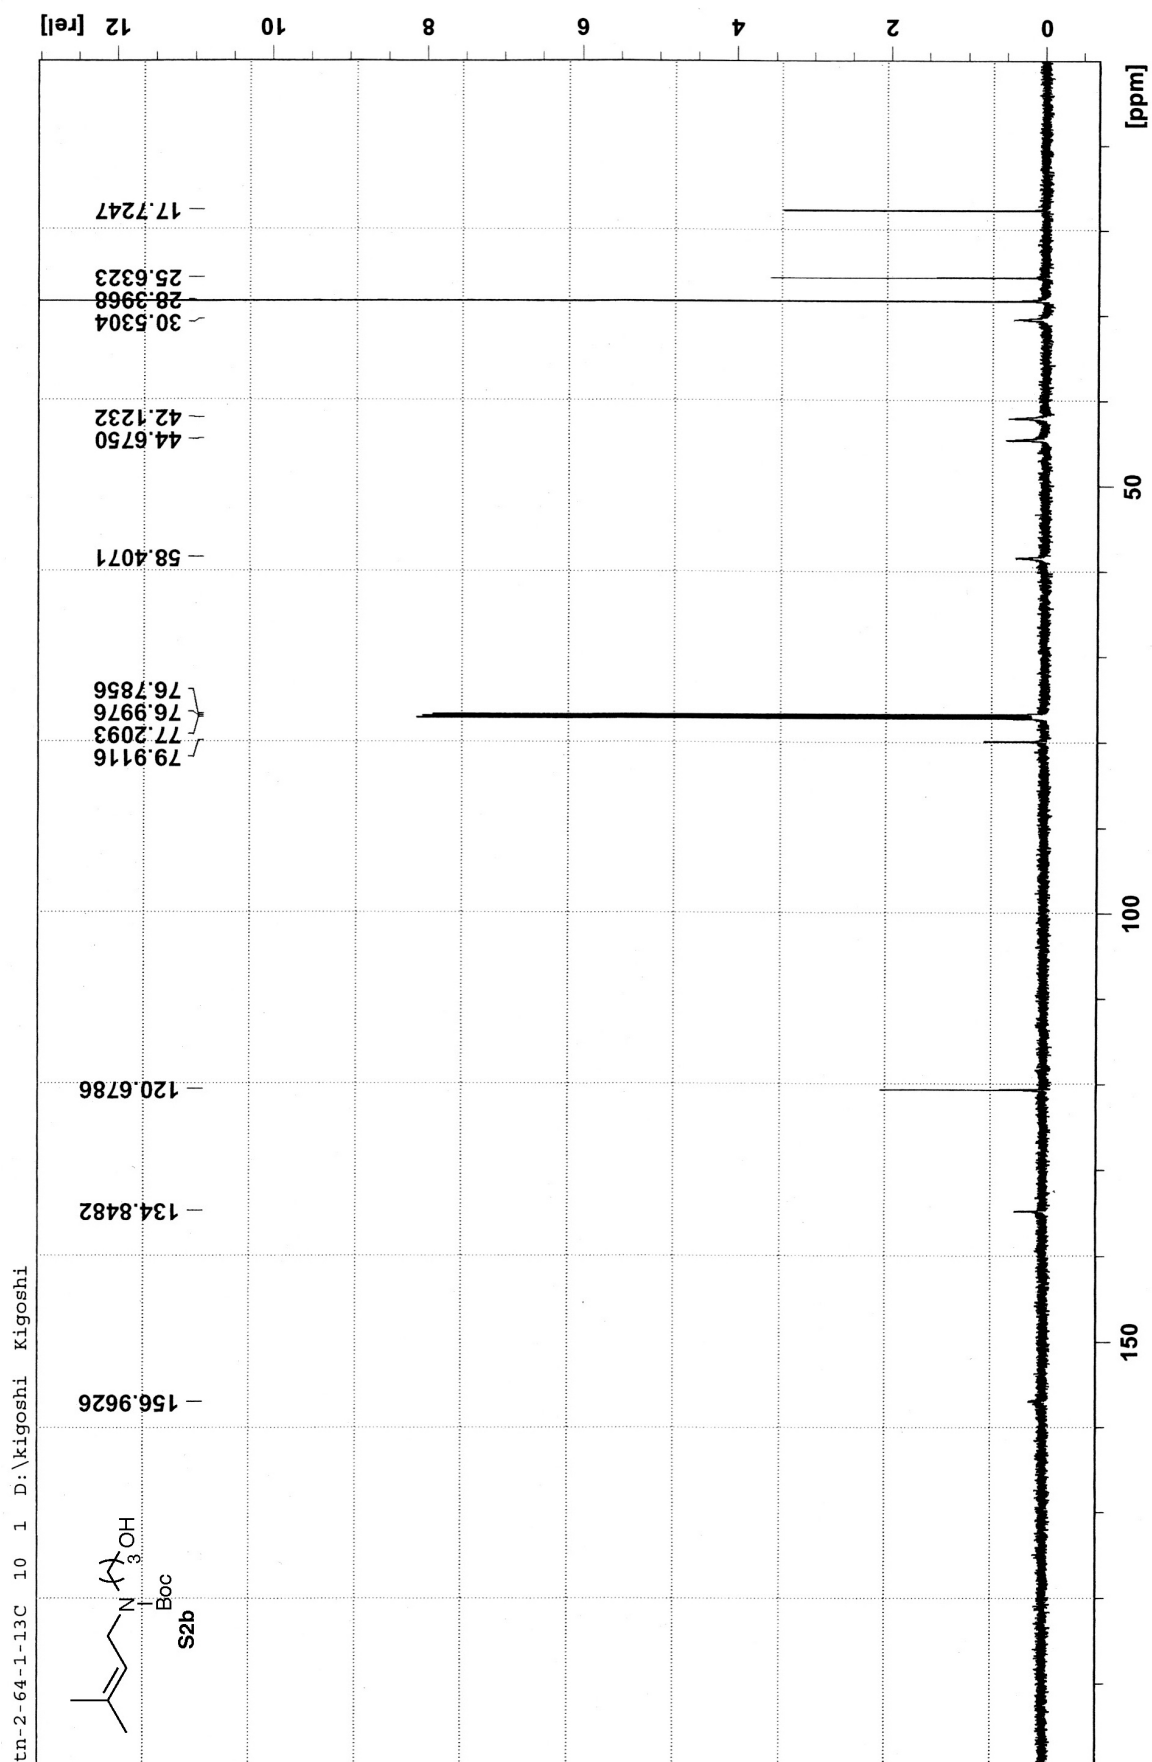

$^{13}\text{C}$  NMR spectra of **S2b** (150 MHz,  $\text{CDCl}_3$ )

tn-2-66-1 10 1 D:\kigoshi Kigoshi

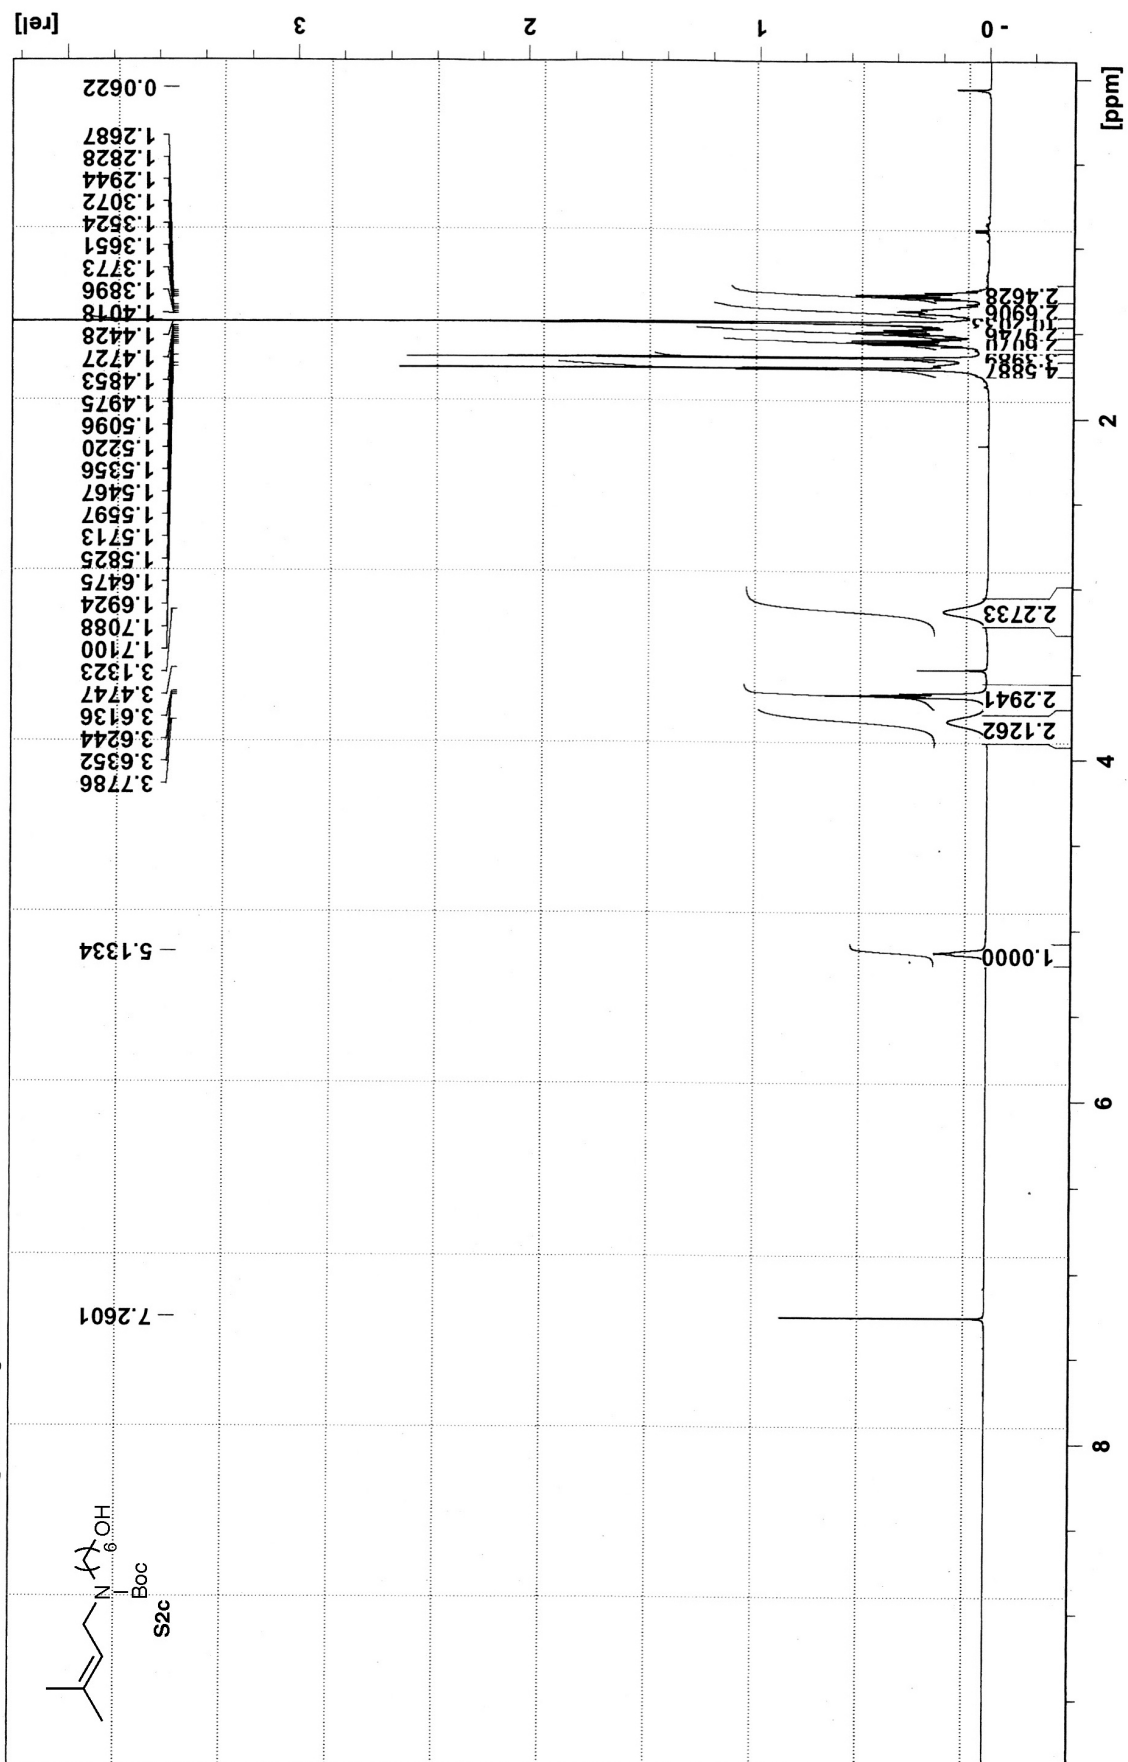

$^1\text{H}$  NMR spectra of **S2c** (600 MHz,  $\text{CDCl}_3$ )

tn-2-66-1-13C 10 1 D:\kigoshi Kigoshi

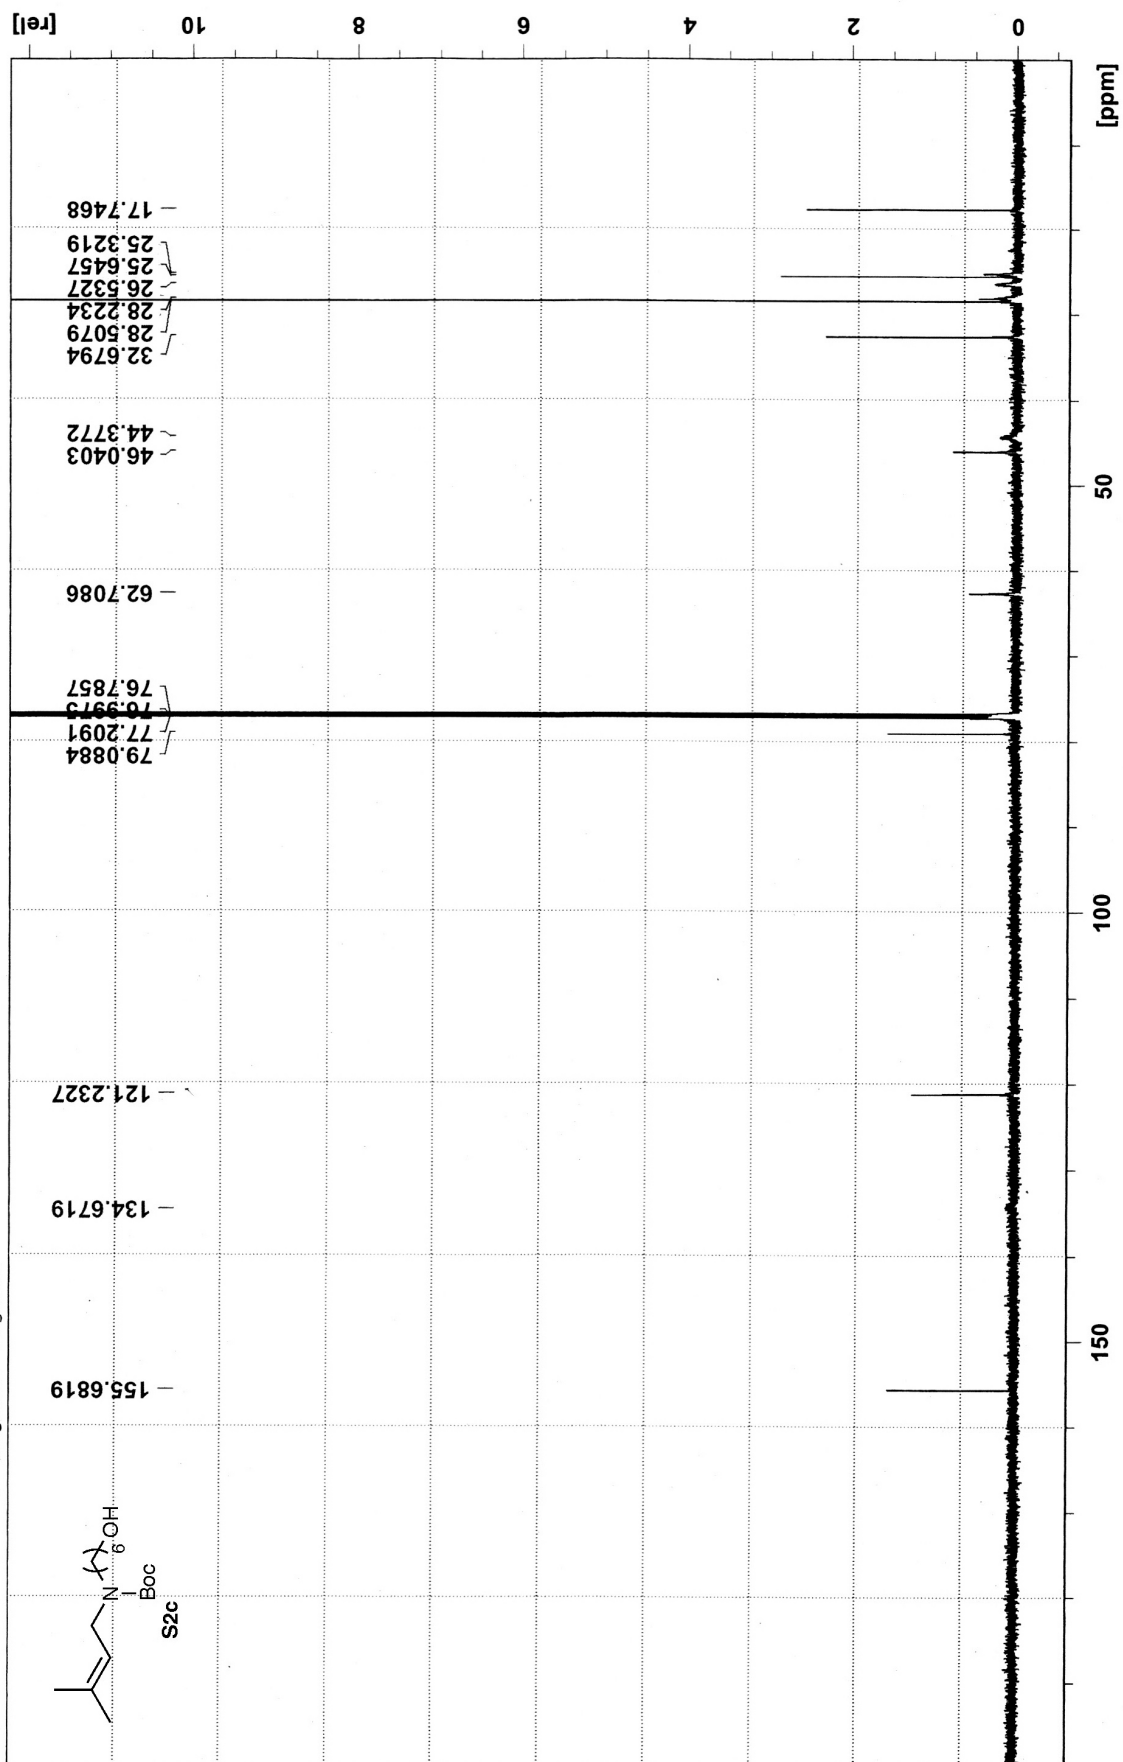

$^{13}\text{C}$  NMR spectra of S2c (150 MHz,  $\text{CDCl}_3$ )

tn-segmentB-8 10 1 D:\kigoshi Kigoshi

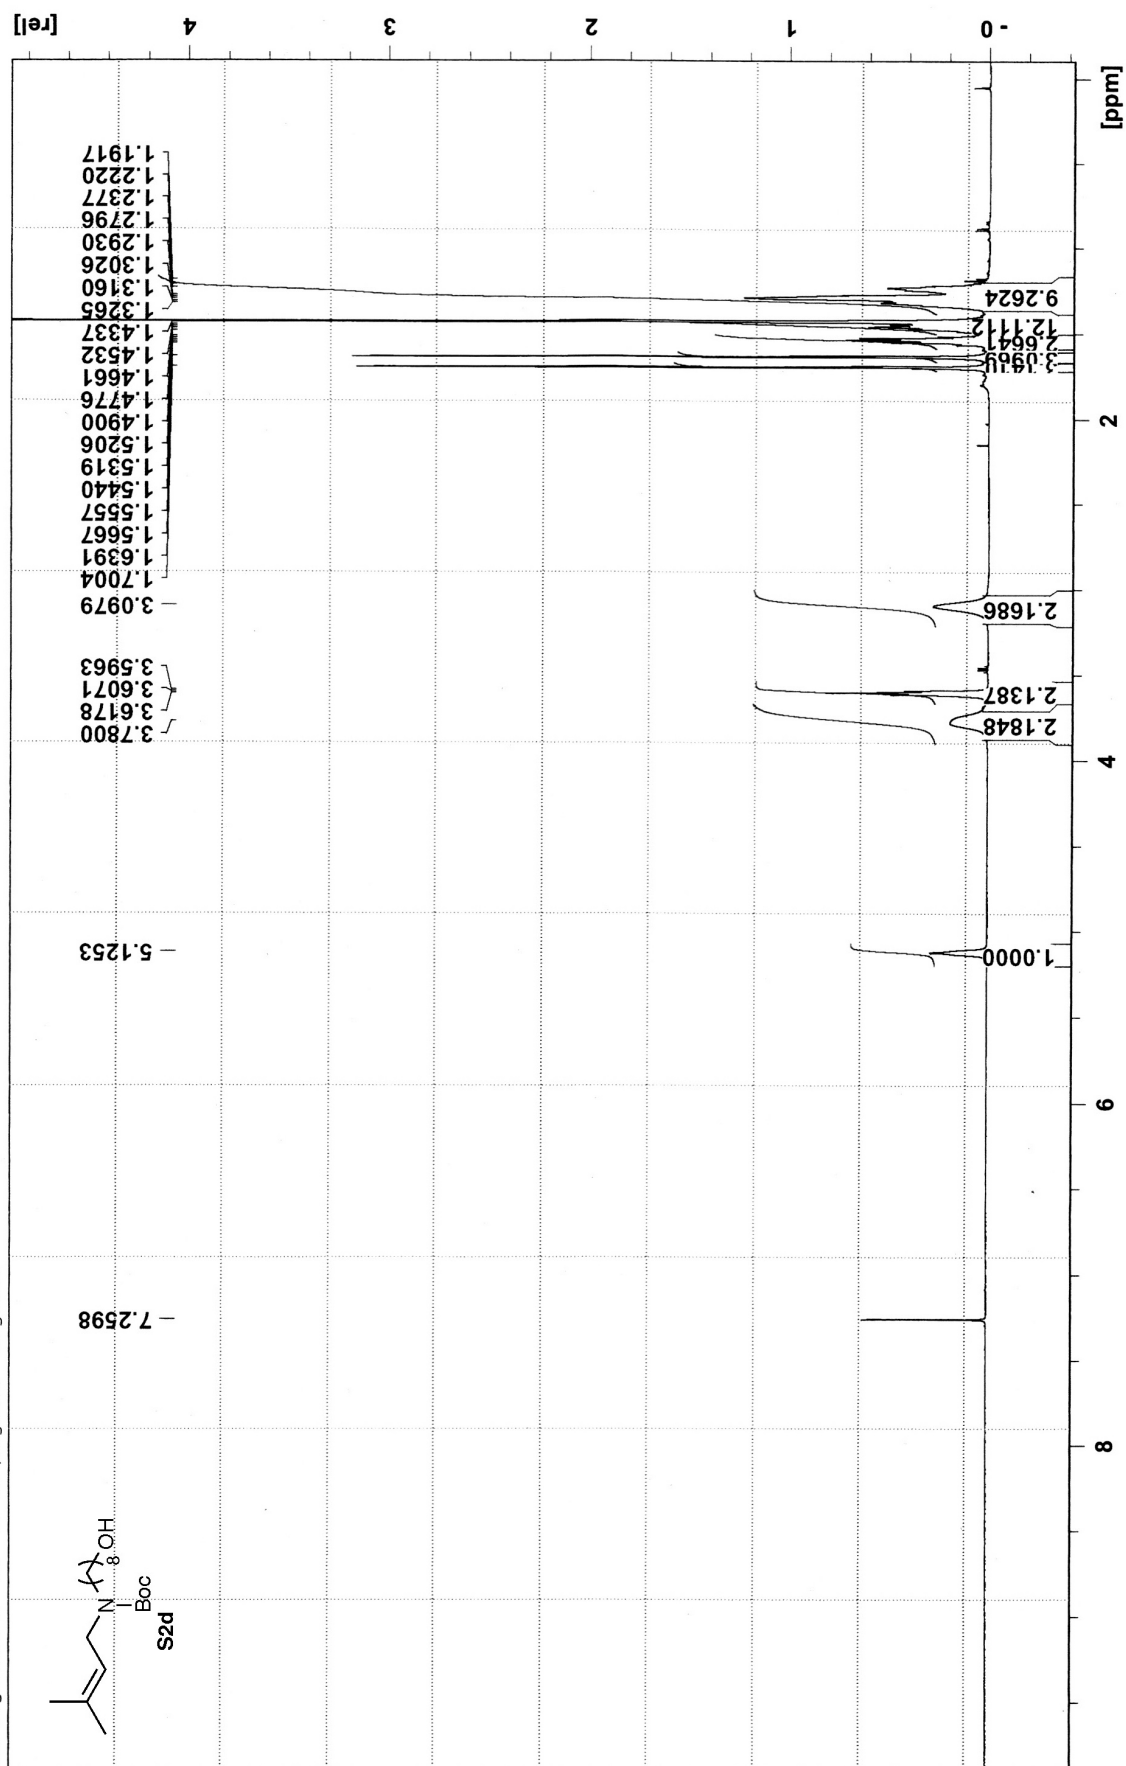

$^1\text{H}$  NMR spectra of **S2d** (600 MHz,  $\text{CDCl}_3$ )



tn-segmentB-8-13C 10 1 D:\kigoshi Kigoshi

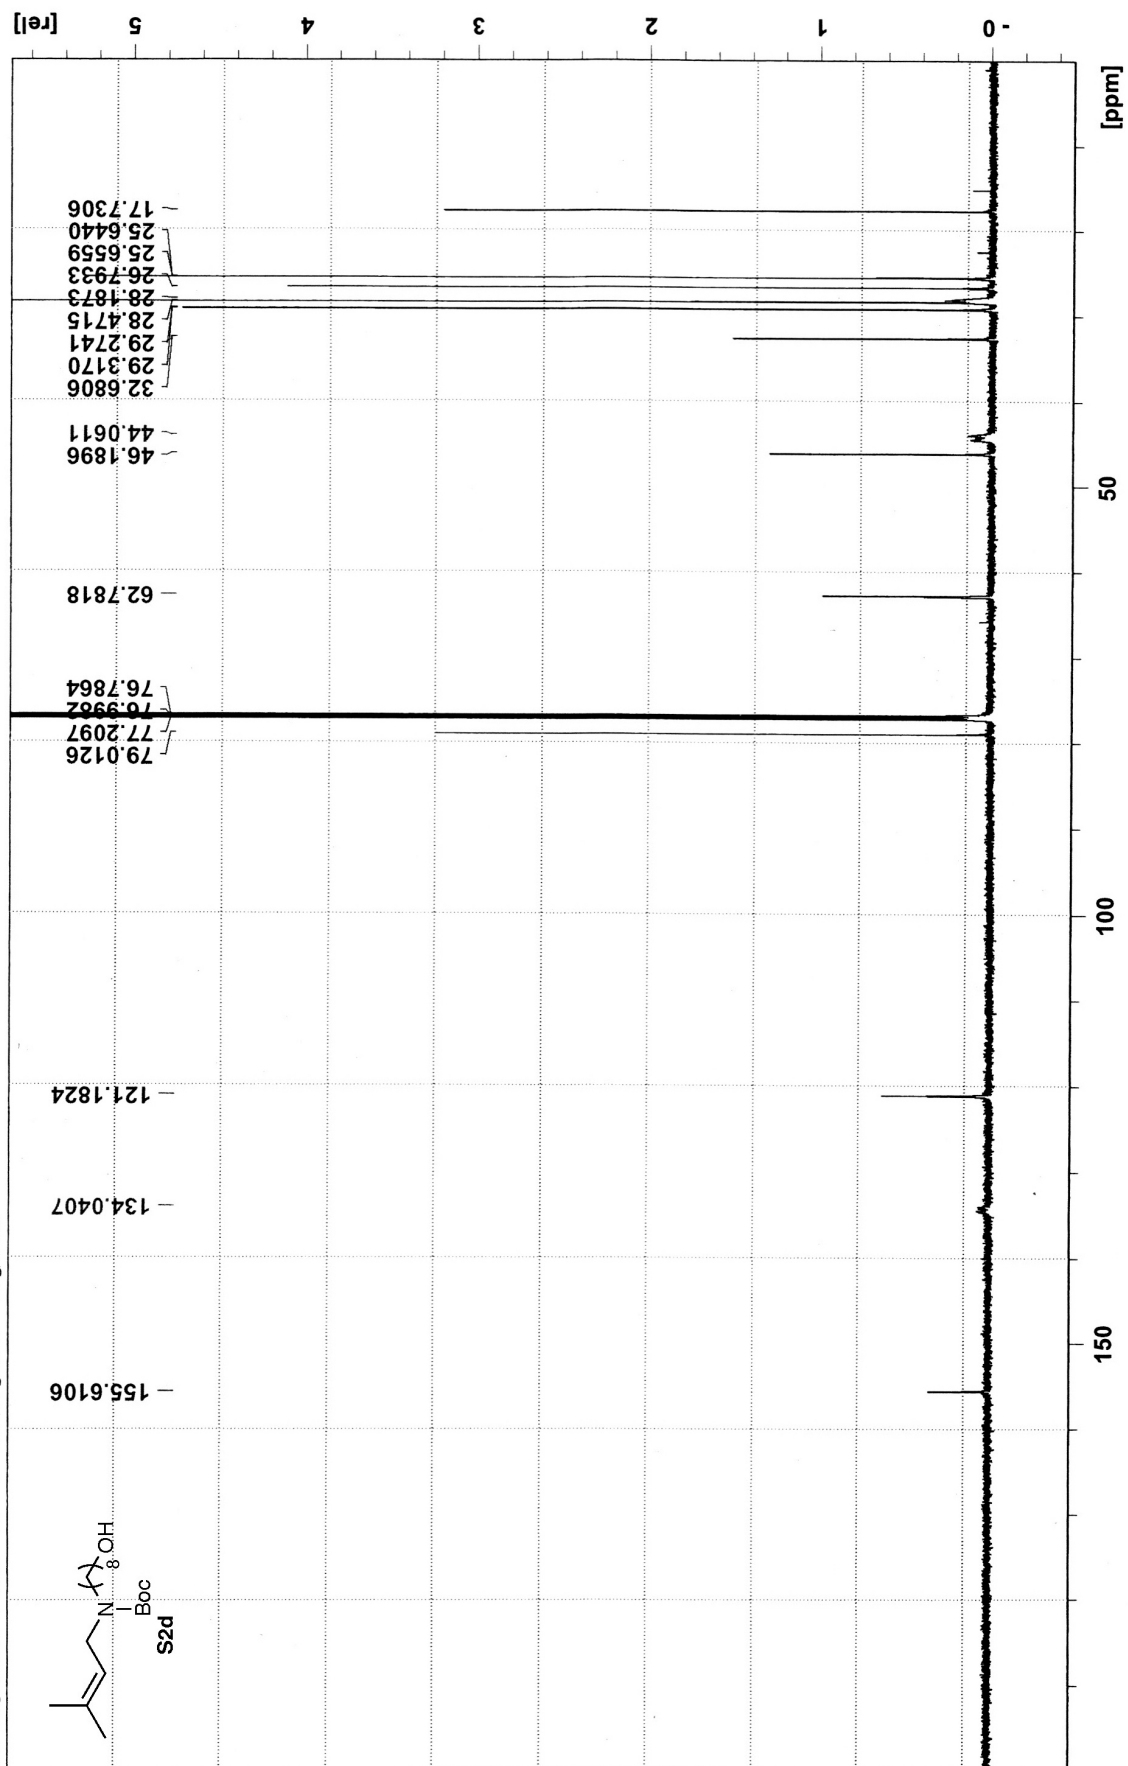

$^{13}\text{C}$  NMR spectra of **S2d** (150 MHz,  $\text{CDCl}_3$ )

tn-2-87-1 10 1 D:\kigoshi Kigoshi

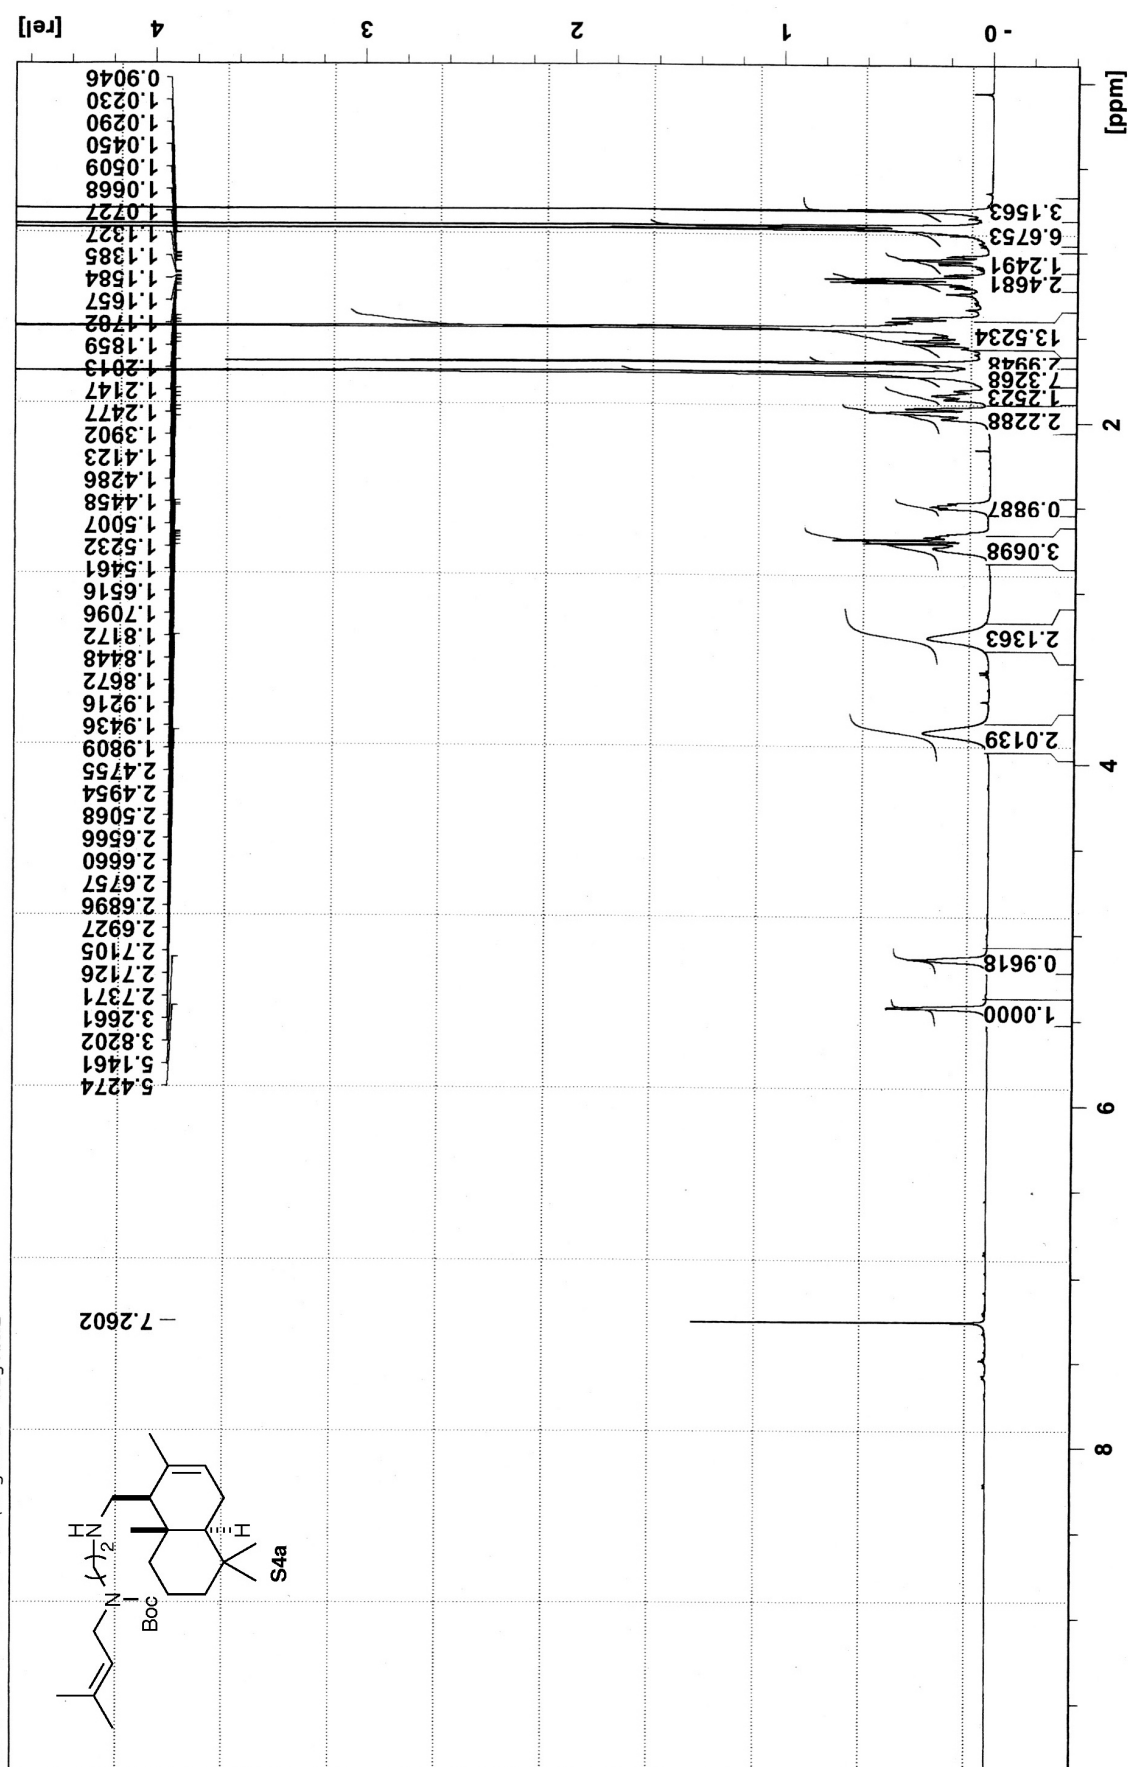

<sup>1</sup>H NMR spectra of **S4a** (600 MHz, CDCl<sub>3</sub>)

tn-2-87-1-13C 10 1 D:\kigoshi Kigoshi

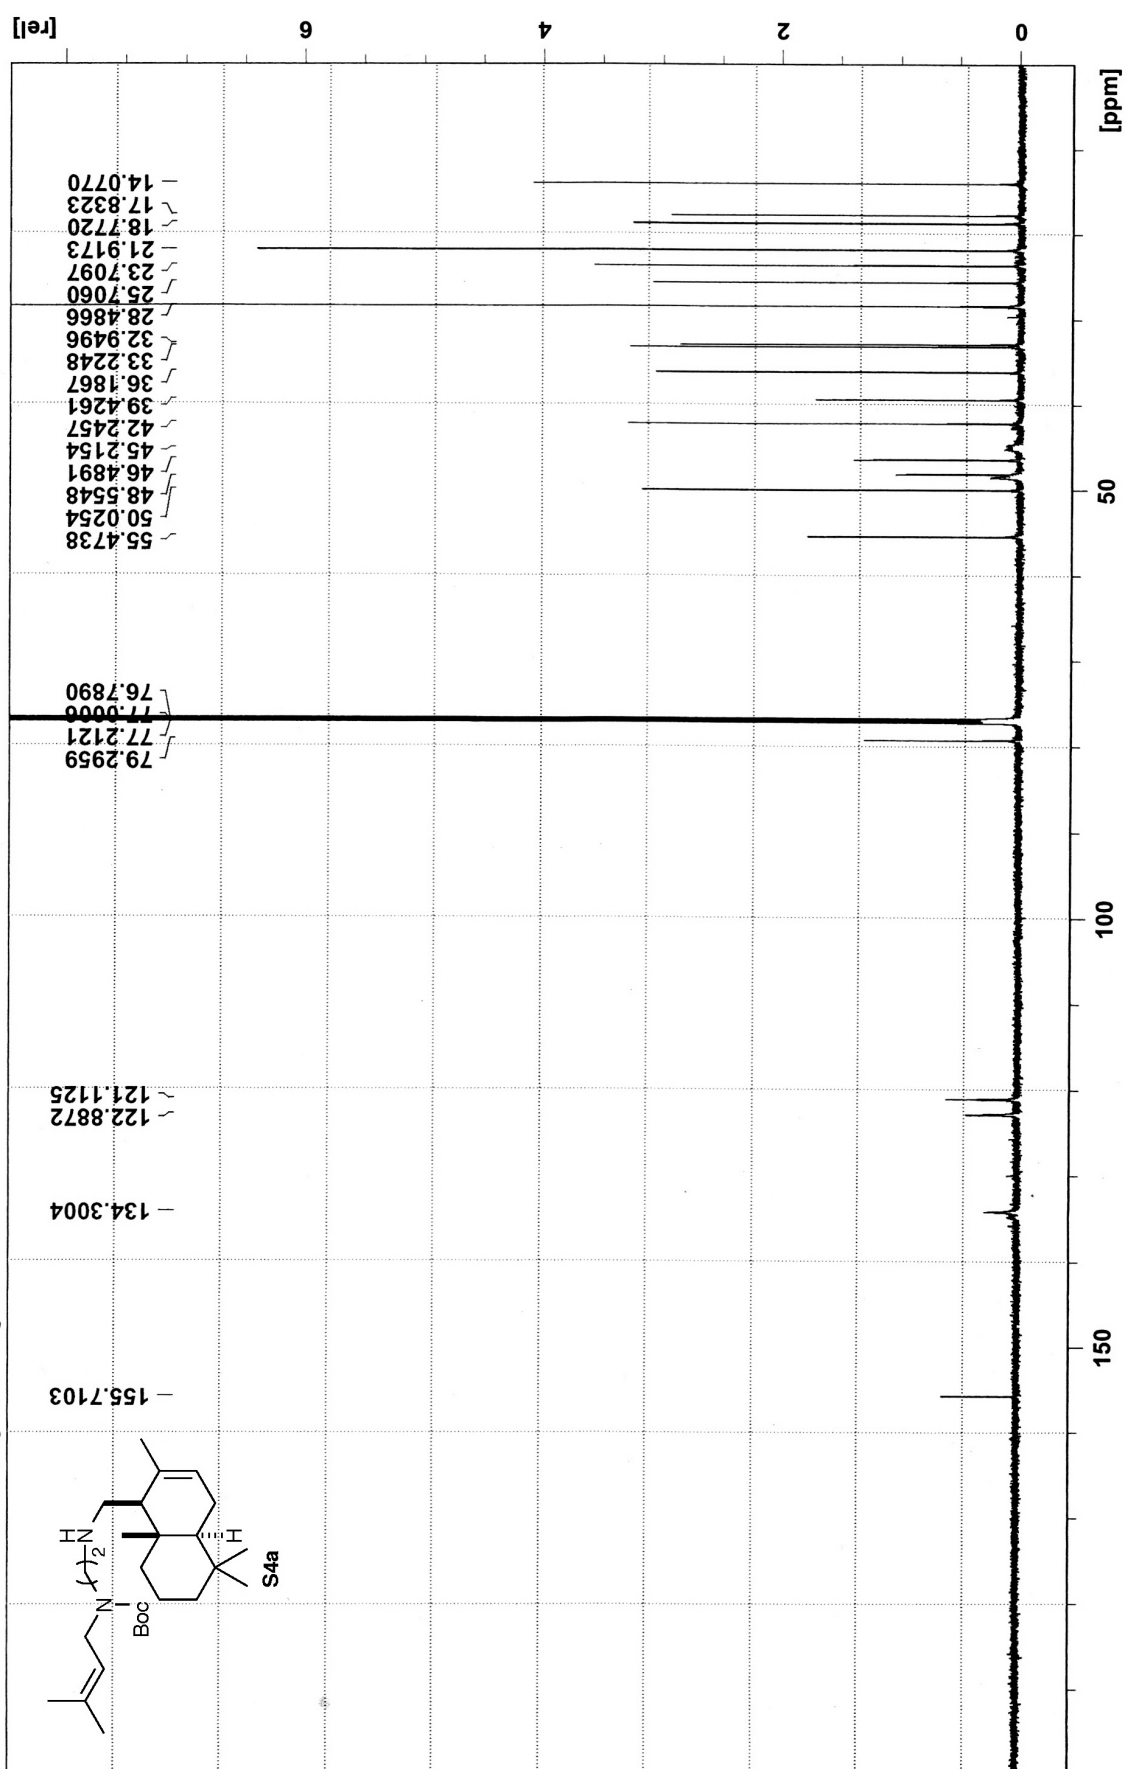

$^{13}\text{C}$  NMR spectra of **S4a** (150 MHz,  $\text{CDCl}_3$ )



tn-2-71-1-13C 10 1 D:\kigoshi Kigoshi

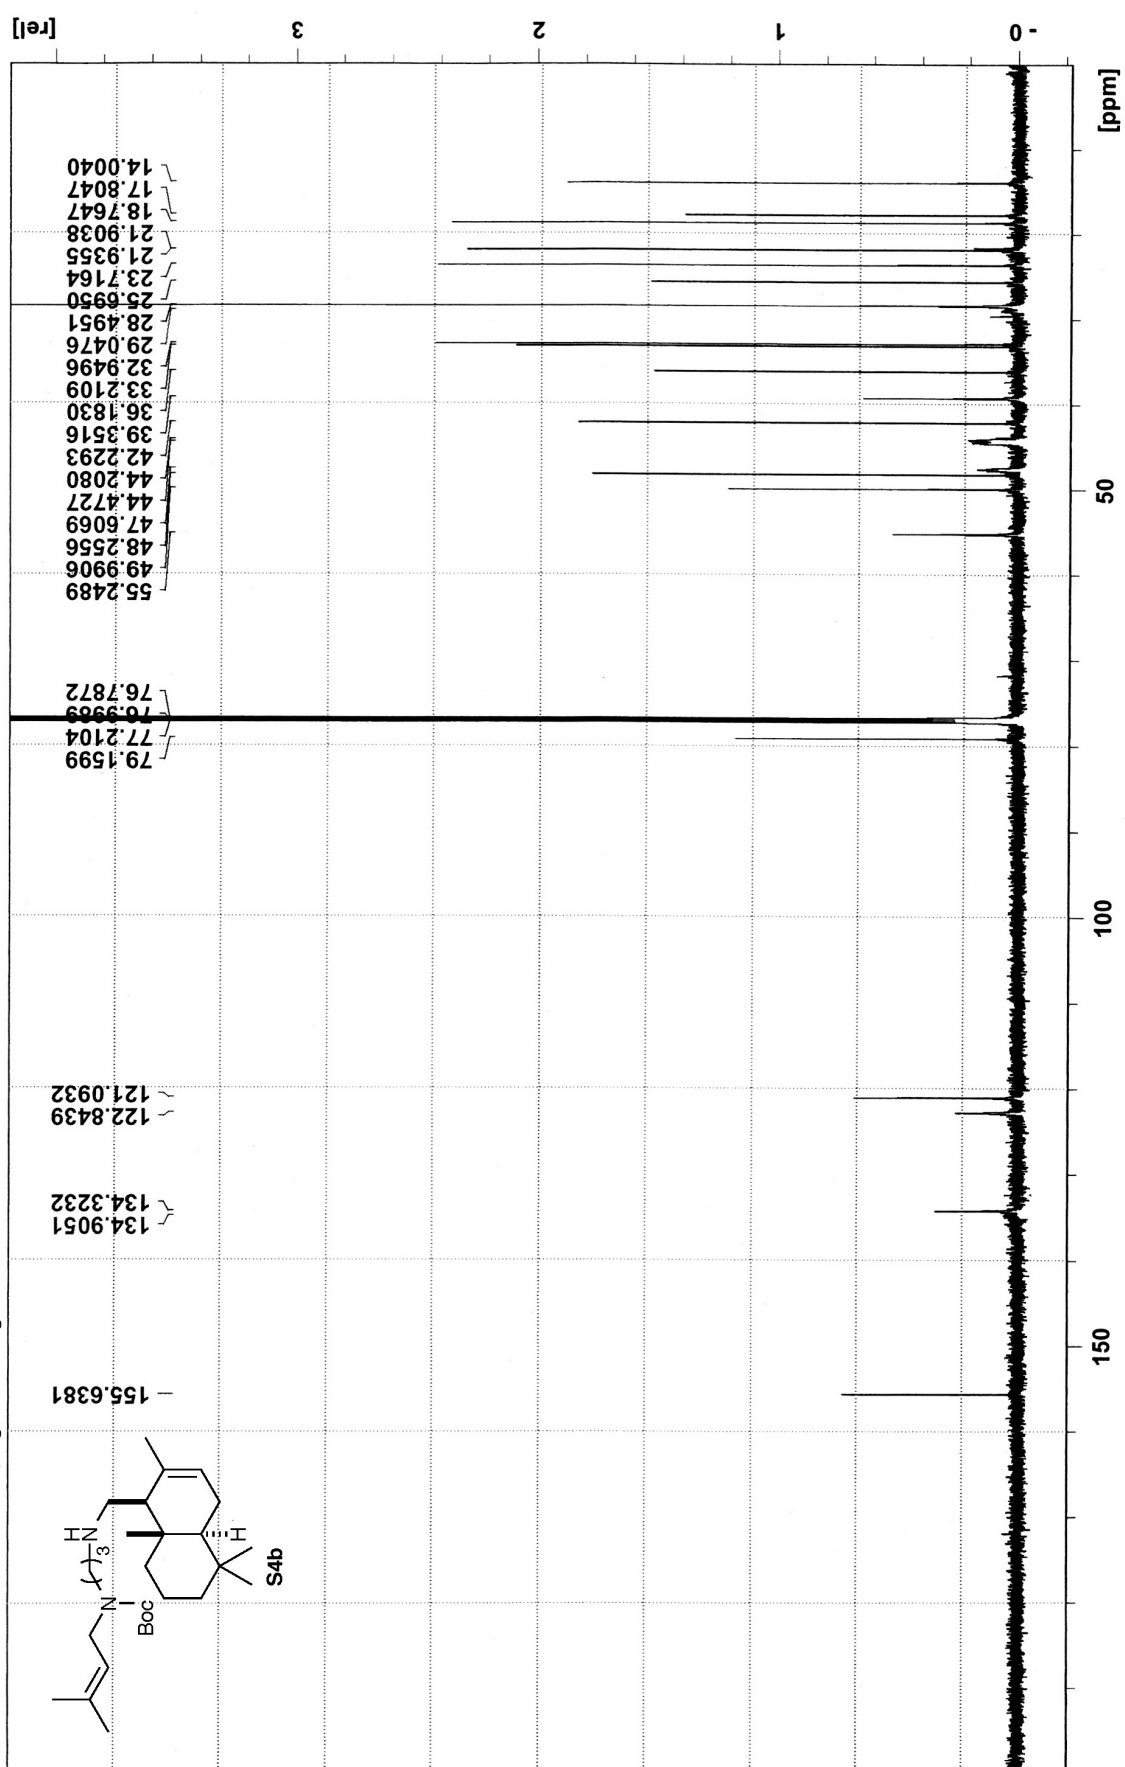

$^{13}\text{C}$  NMR spectra of **S4b** (150 MHz,  $\text{CDCl}_3$ )

tn-2-72-1 10 1 D:\kigoshi Kigoshi

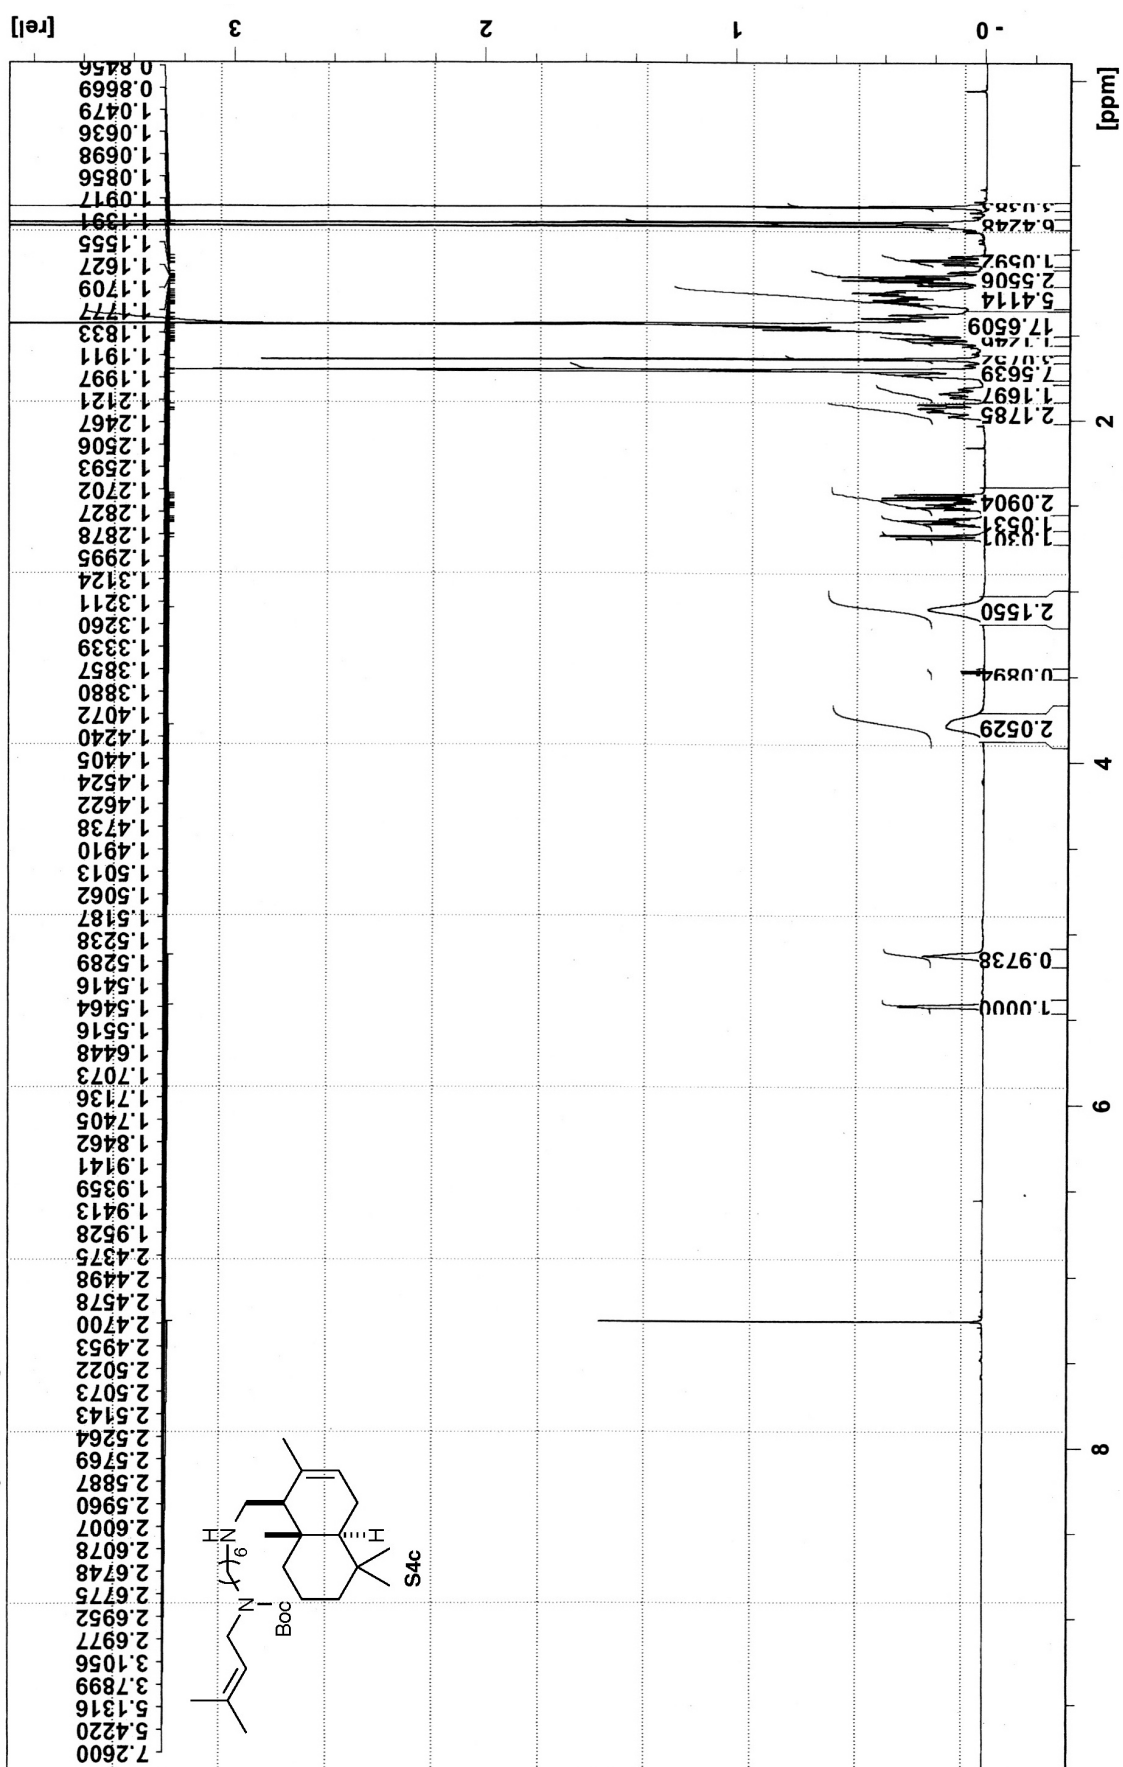

<sup>1</sup>H NMR spectra of **S4c** (600 MHz, CDCl<sub>3</sub>)

tn-2-72-1-13C 10 1 D:\kigoshi Kigoshi

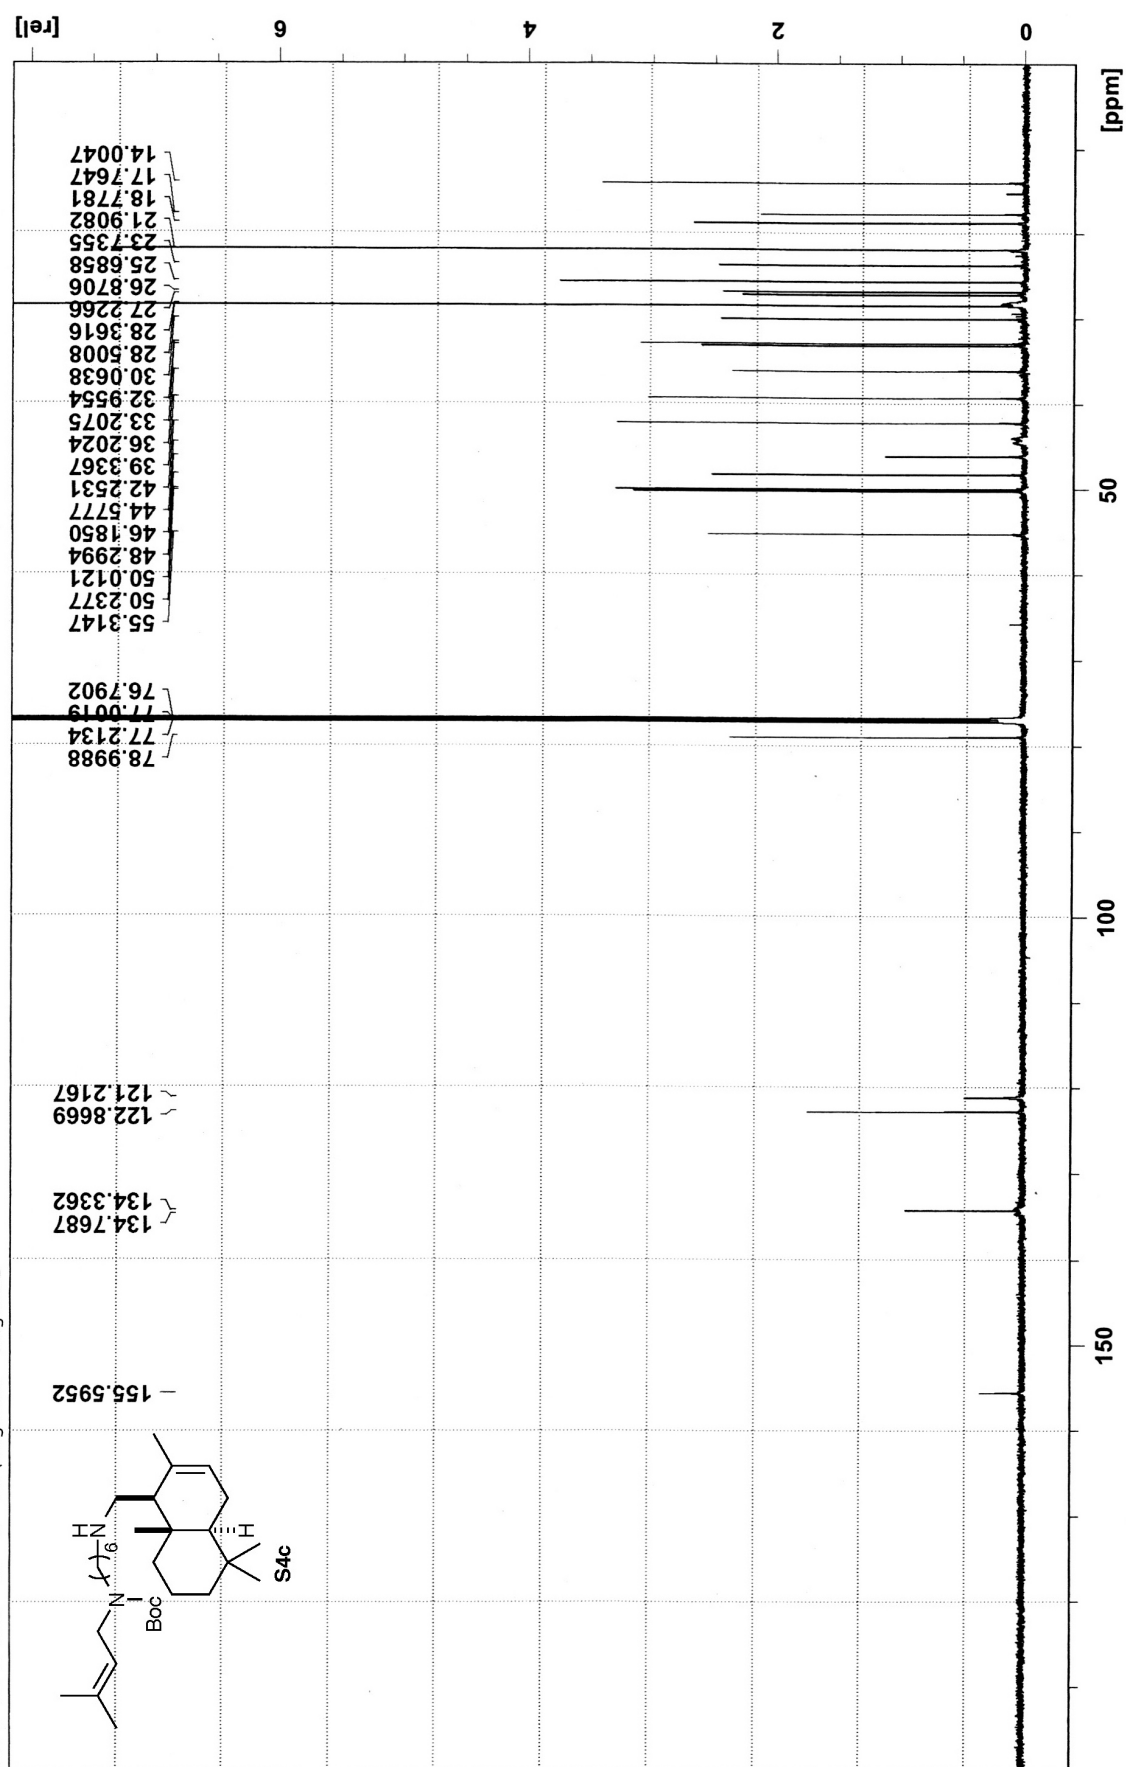

$^{13}\text{C}$  NMR spectra of **S4c** (150 MHz,  $\text{CDCl}_3$ )





tn-2-83-1-13C 10 1 D:\kigoshi Kigoshi

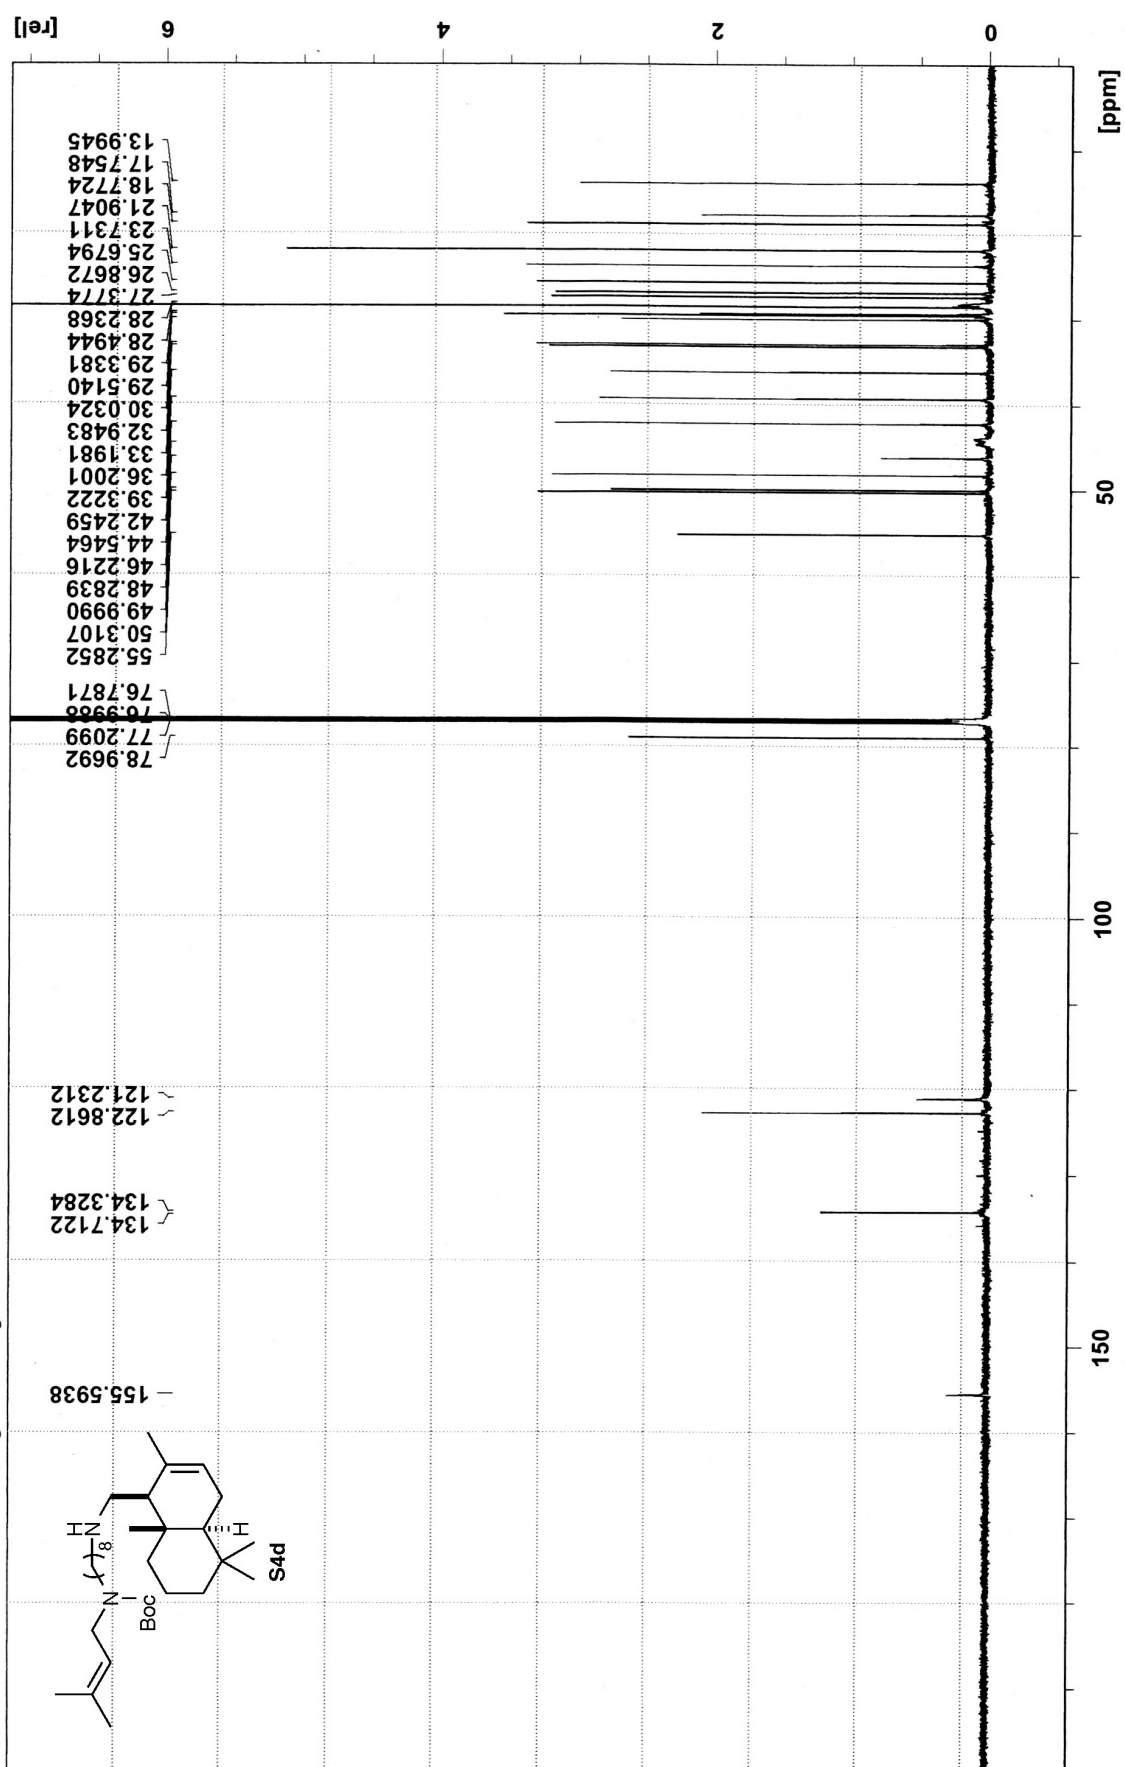

$^{13}\text{C}$  NMR spectra of **S4d** (150 MHz,  $\text{CDCl}_3$ )

S52



[illegible]





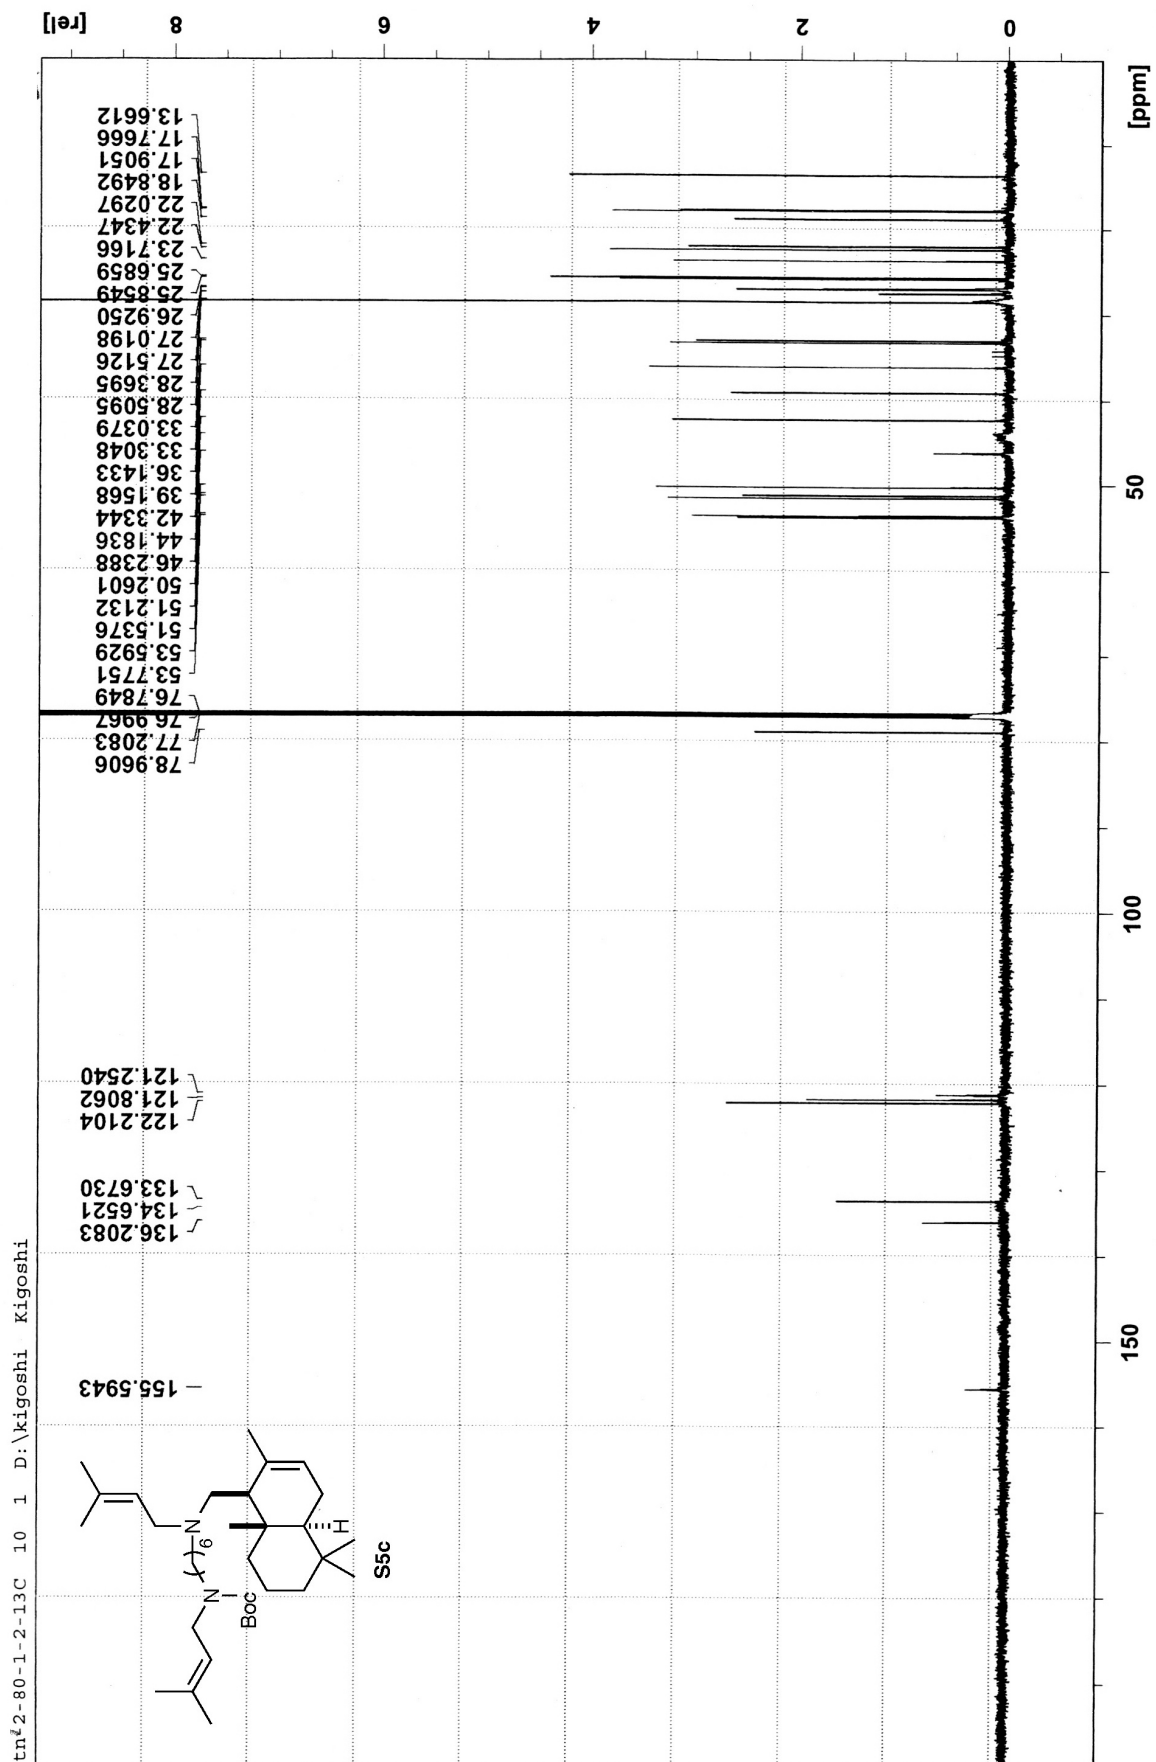

$^{13}\text{C}$  NMR spectra of **S5c** (150 MHz,  $\text{CDCl}_3$ )

tm-2-86-1 10 1 D:\kigoshi Kigoshi

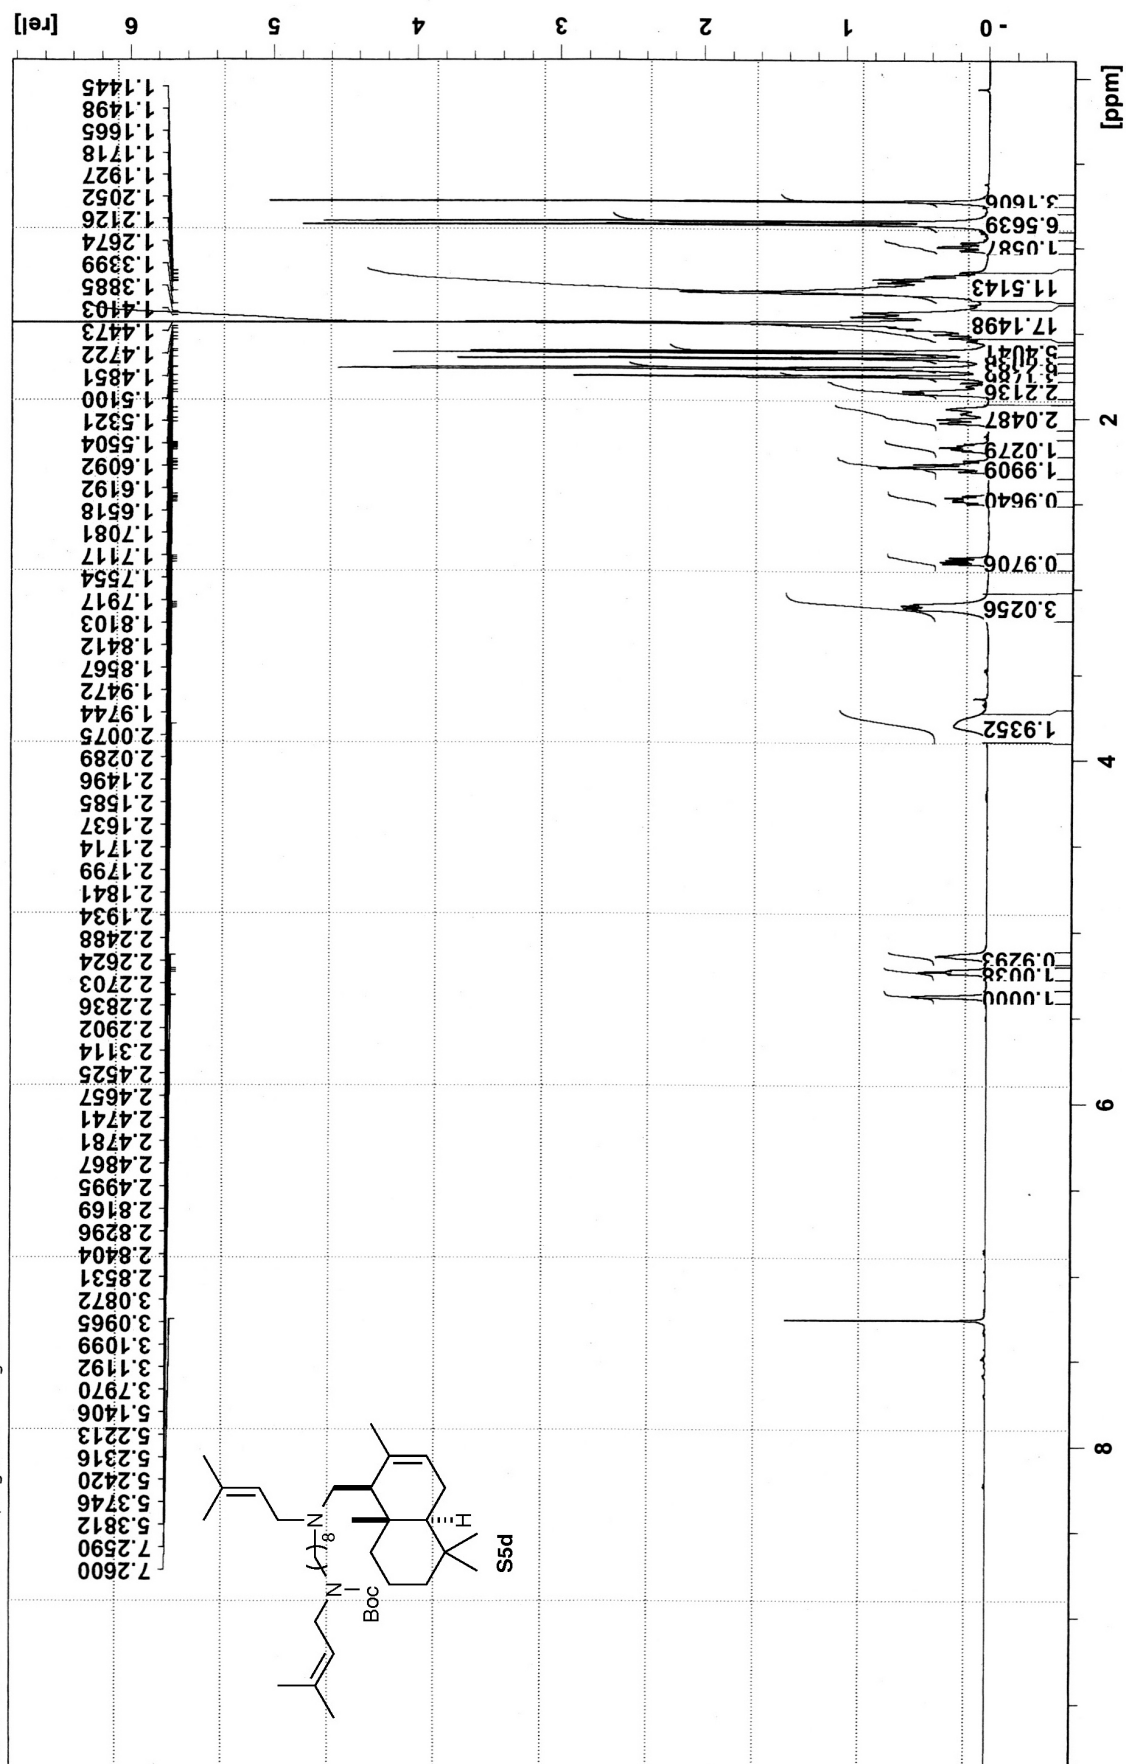

<sup>1</sup>H NMR spectra of **S5d** (600 MHz, CDCl<sub>3</sub>)





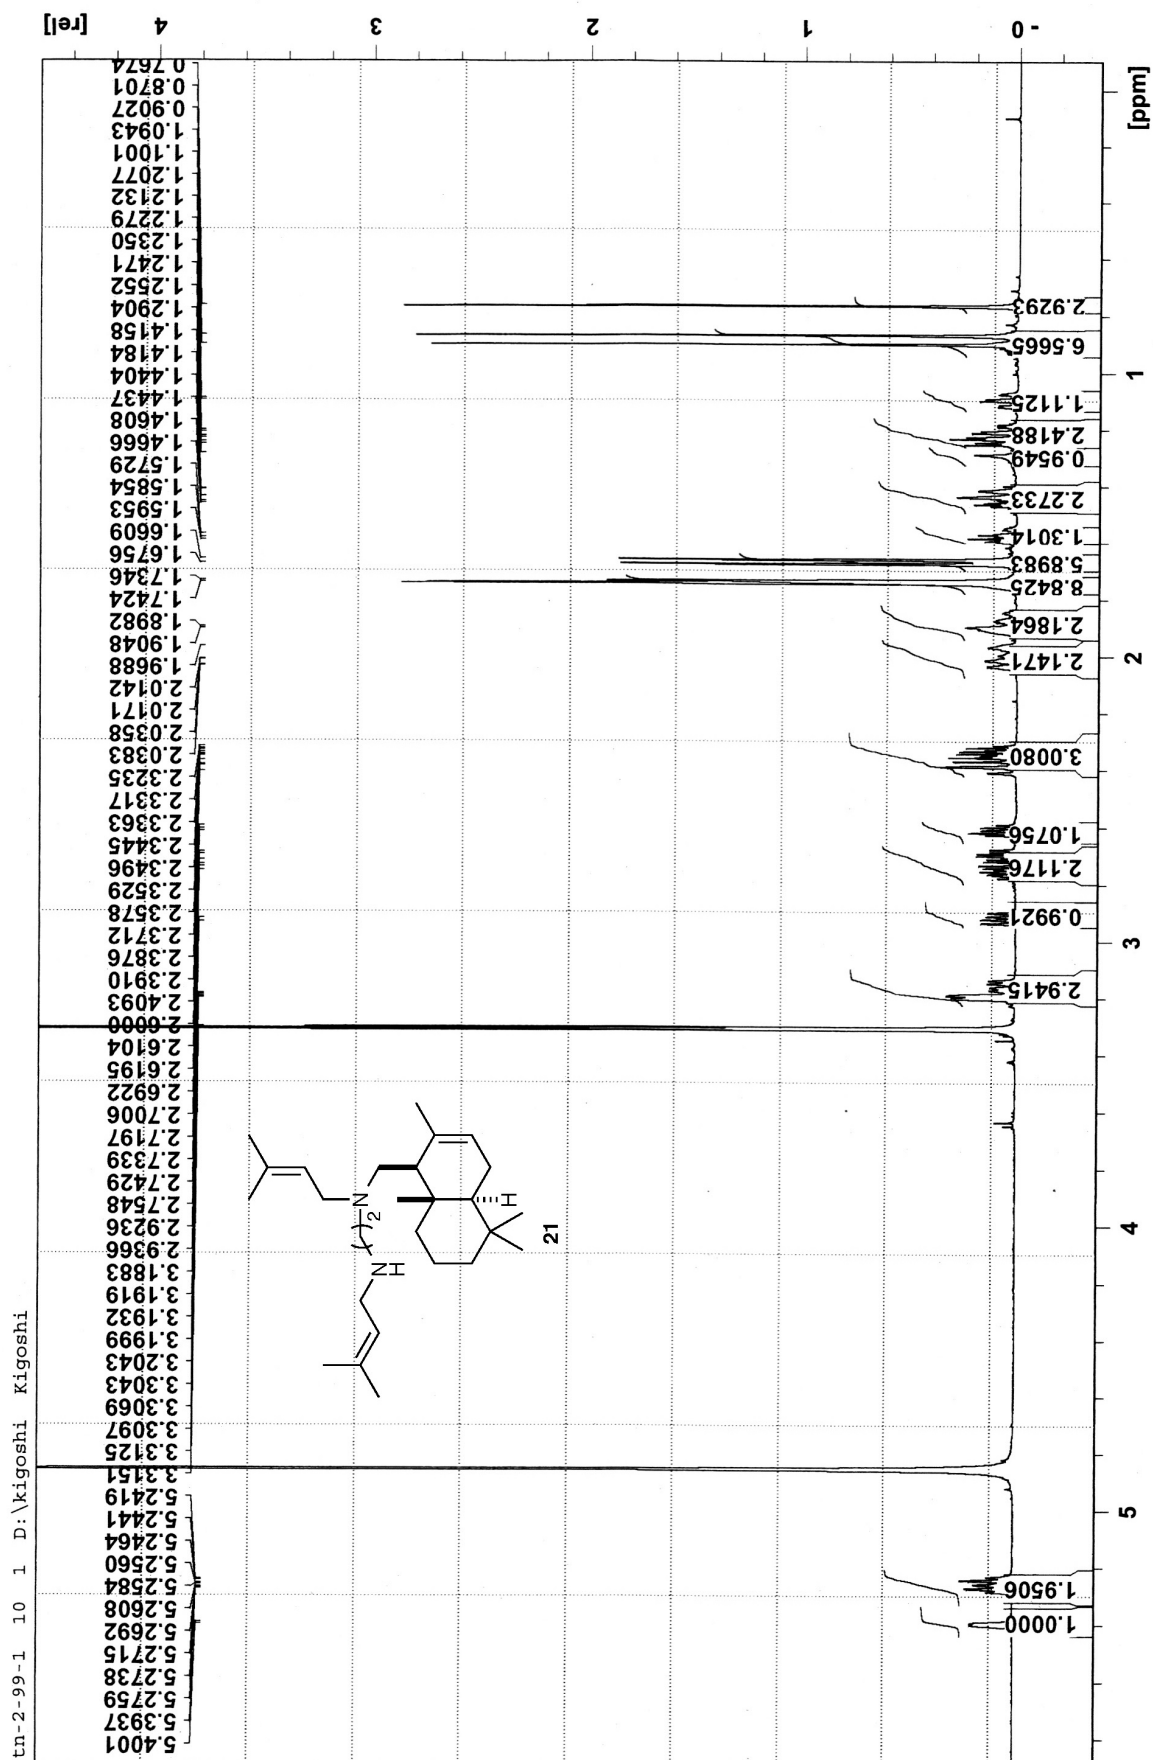

$^1\text{H}$  NMR spectra of **21** (600 MHz,  $\text{CD}_3\text{OD}$ )

tn-2-99-1-13C 10 1 D:\kigoshi Kigoshi

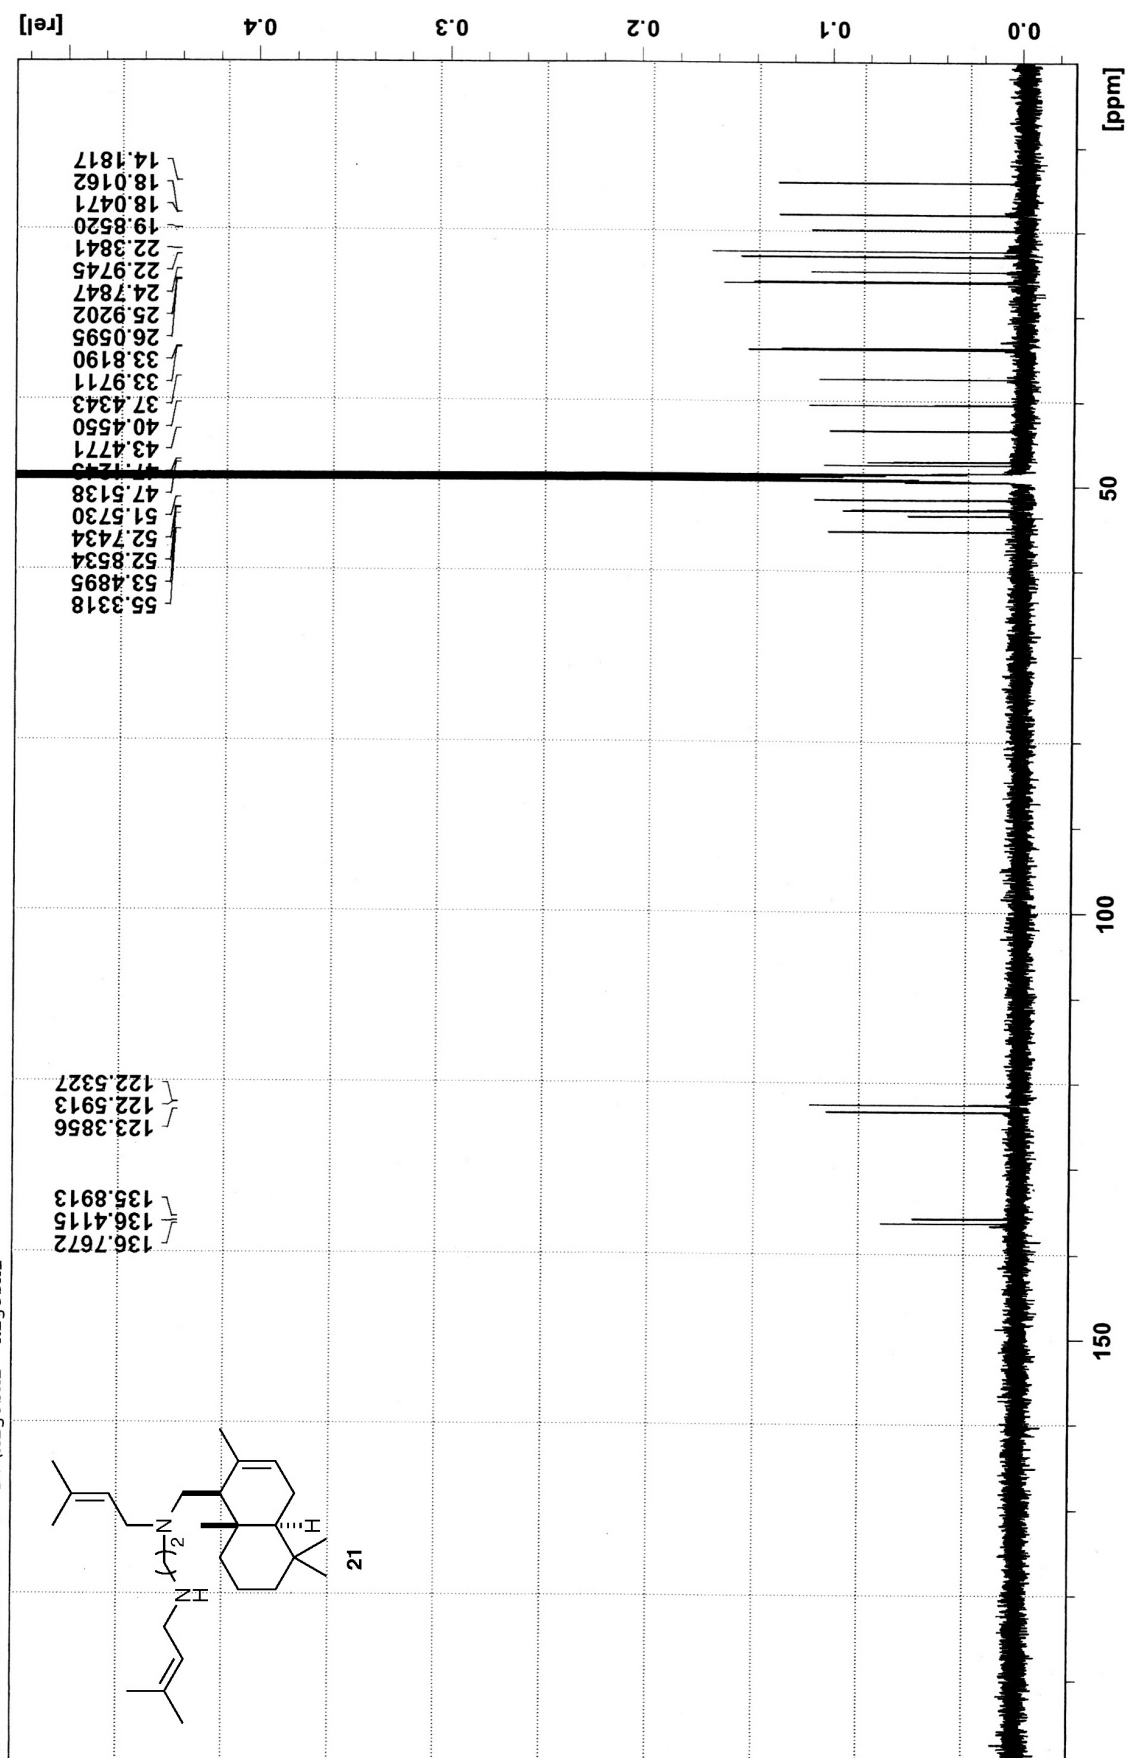

<sup>13</sup>C NMR spectra of **21** (150 MHz, CD<sub>3</sub>OD)

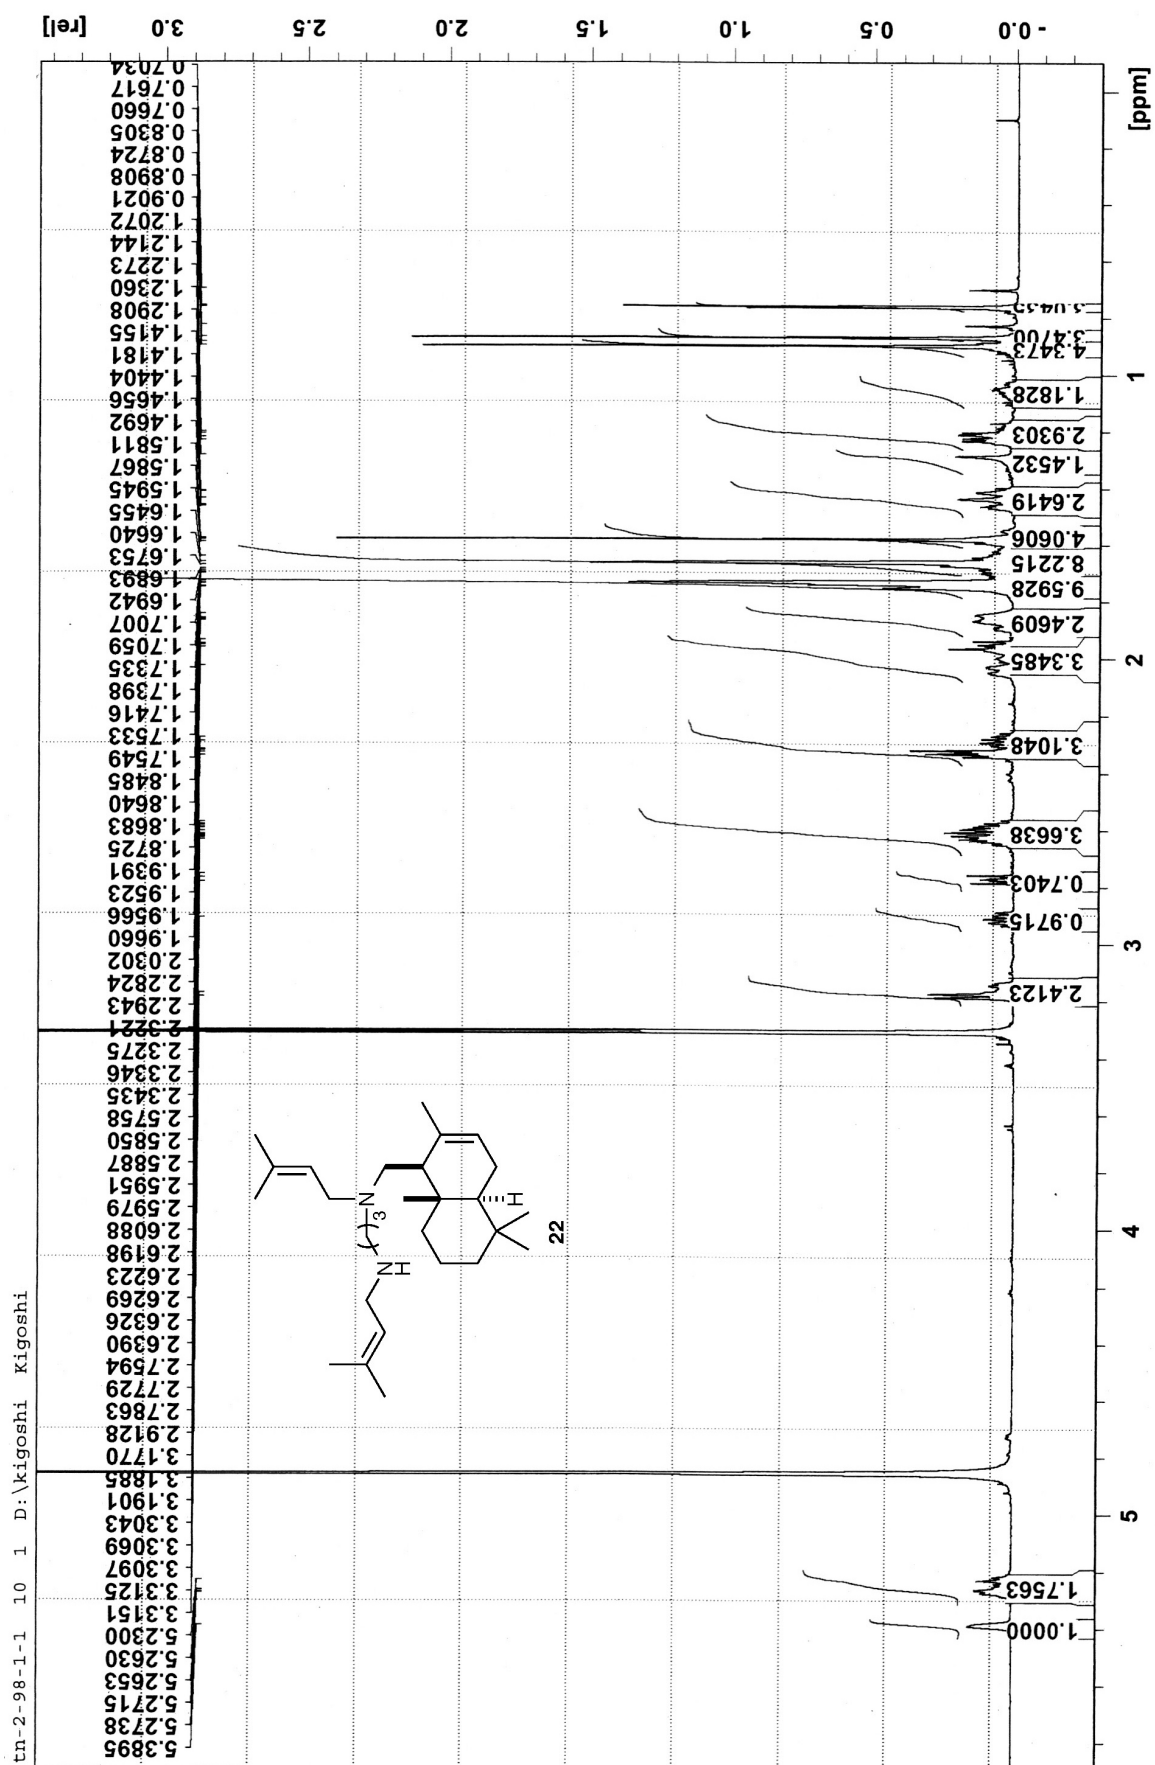

$^1\text{H}$  NMR spectra of **22** (600 MHz,  $\text{CD}_3\text{OD}$ )

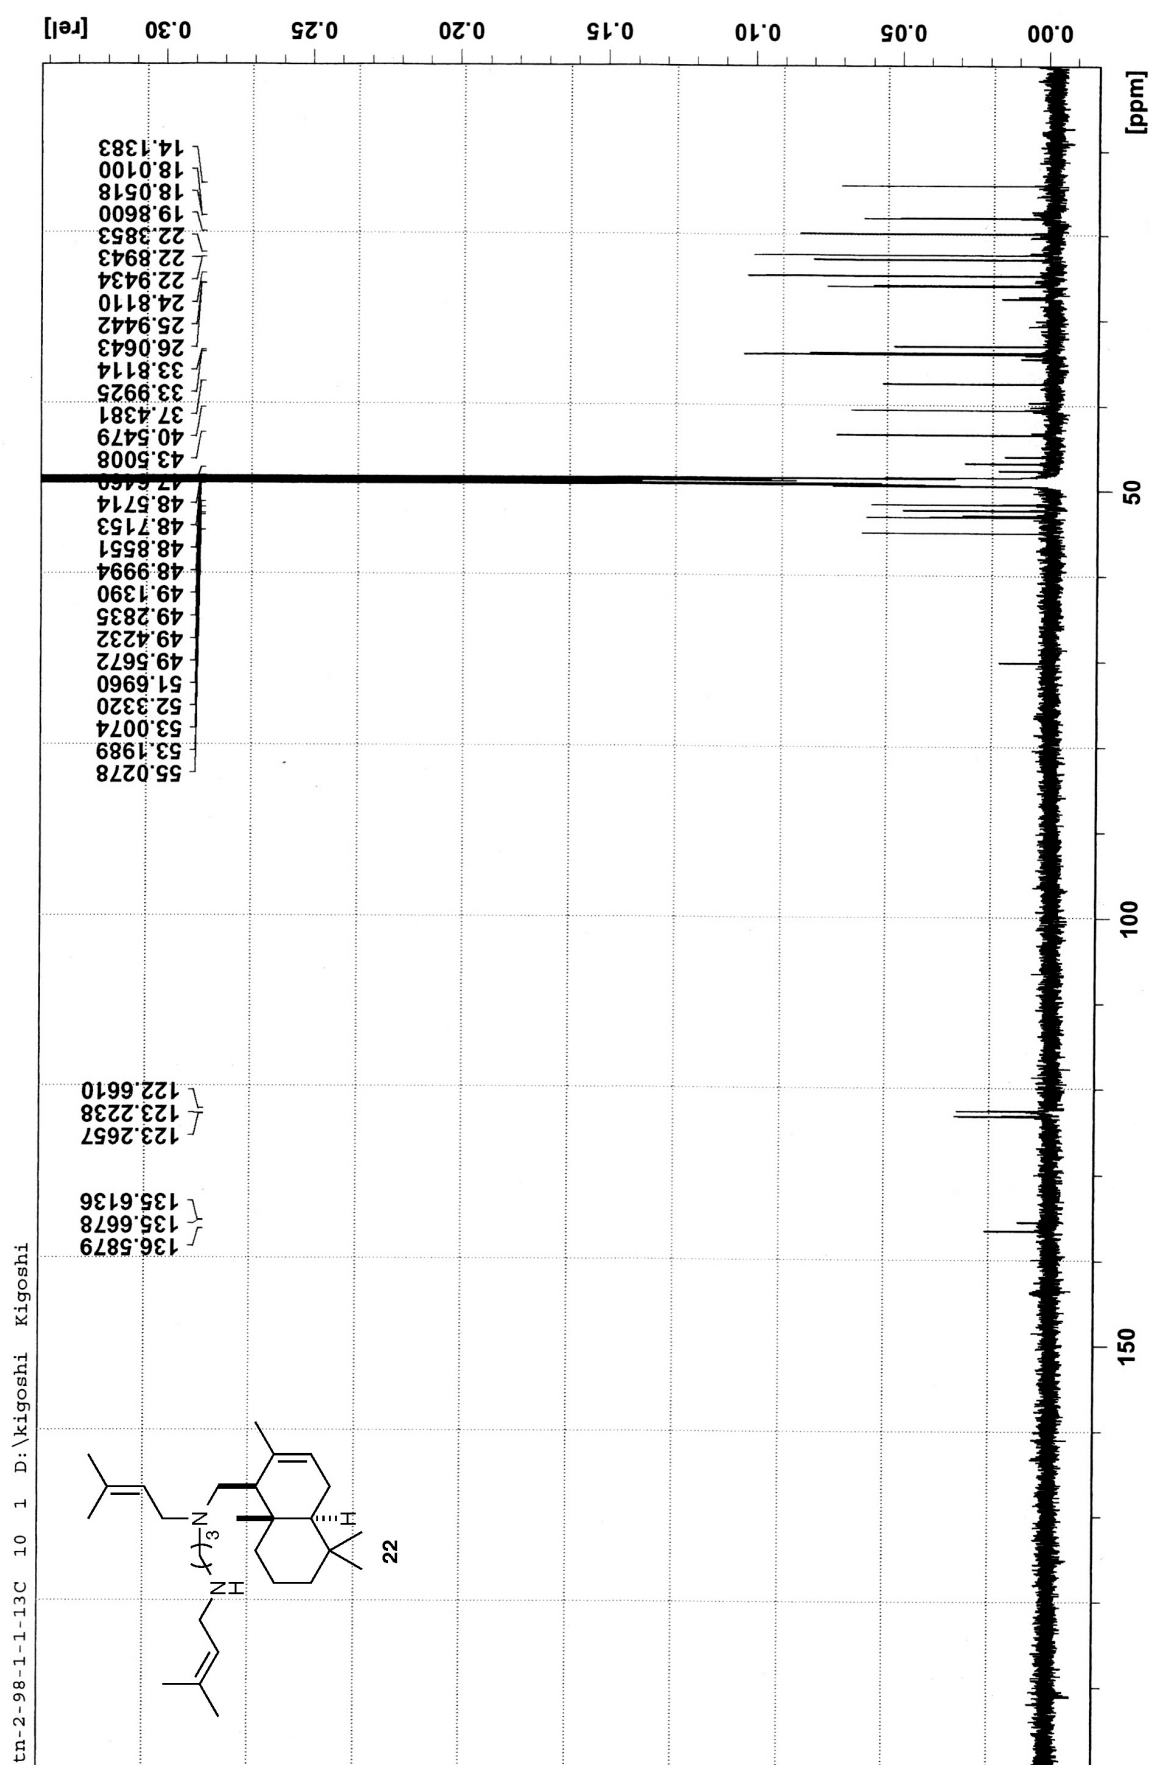

$^{13}\text{C}$  NMR spectra of **22** (150 MHz,  $\text{CD}_3\text{OD}$ )

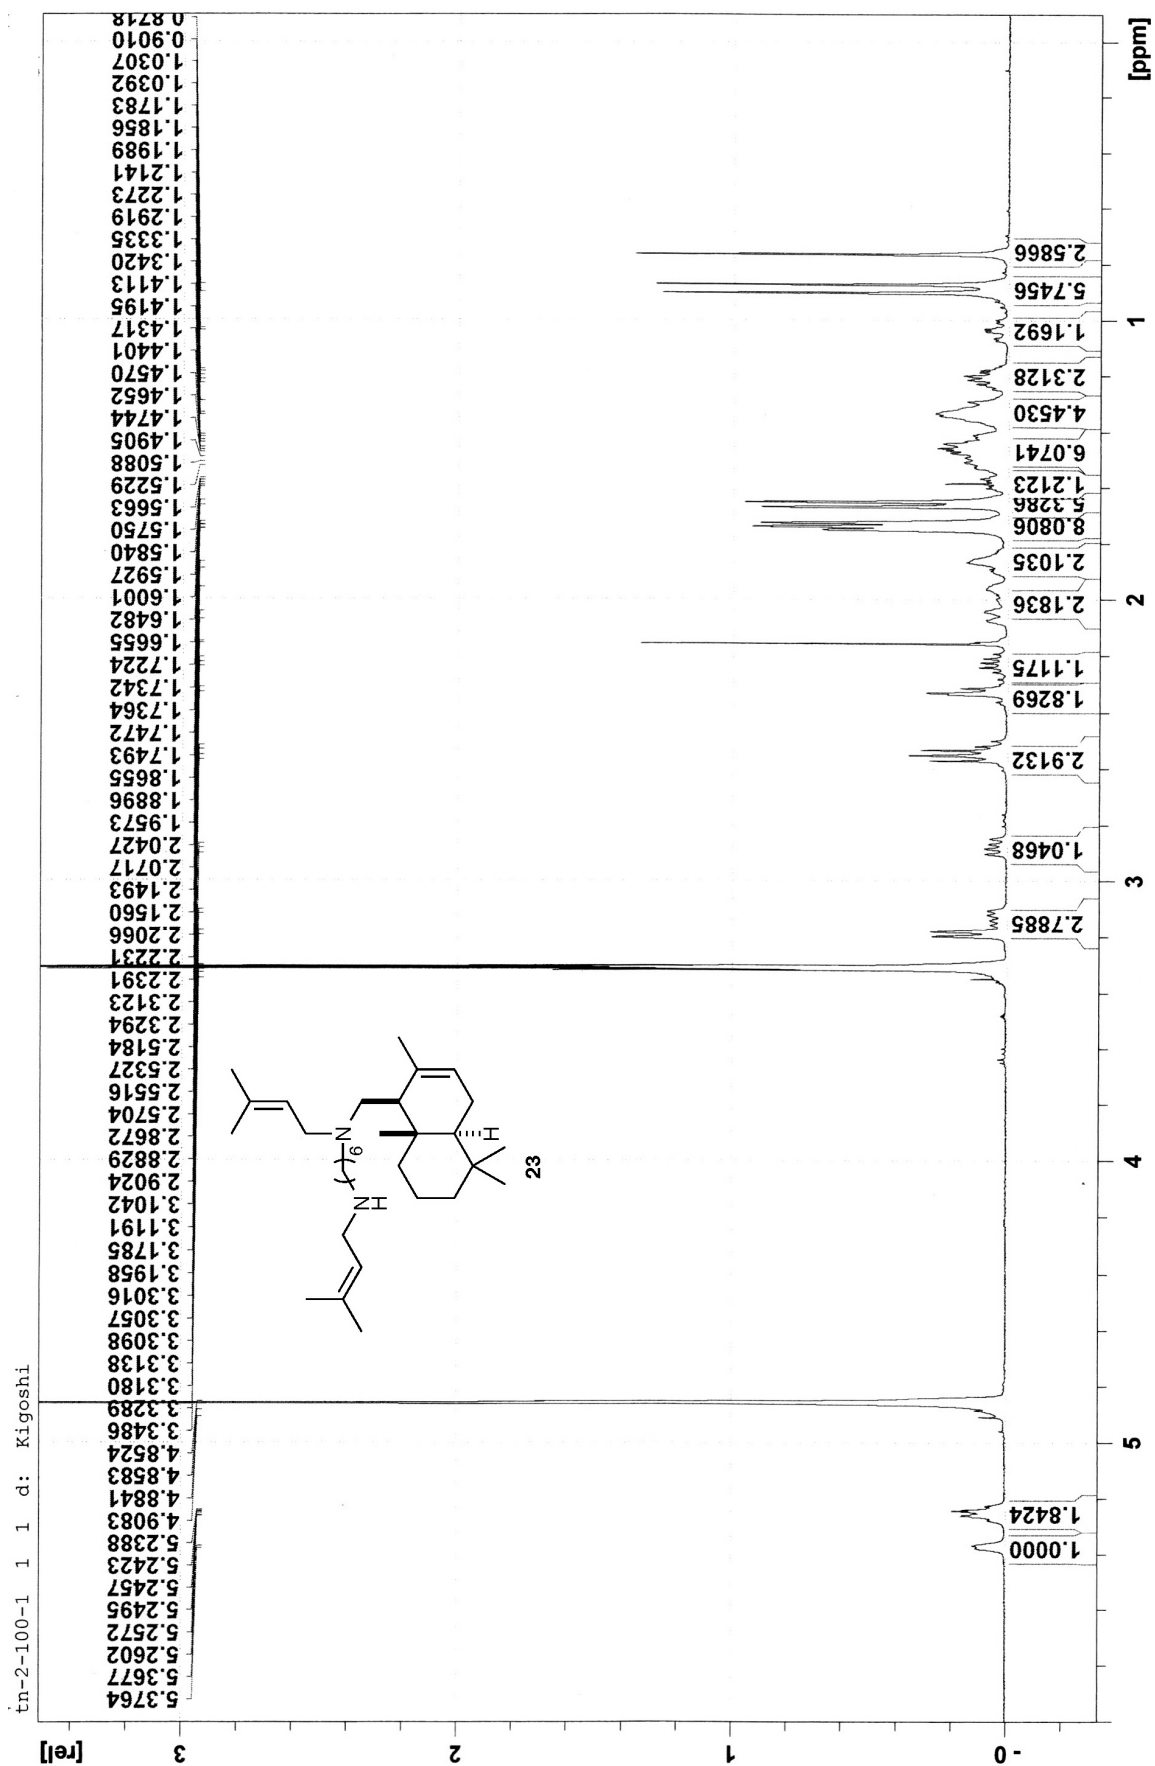

$^1\text{H}$  NMR spectra of **23** (400 MHz,  $\text{CD}_3\text{OD}$ )

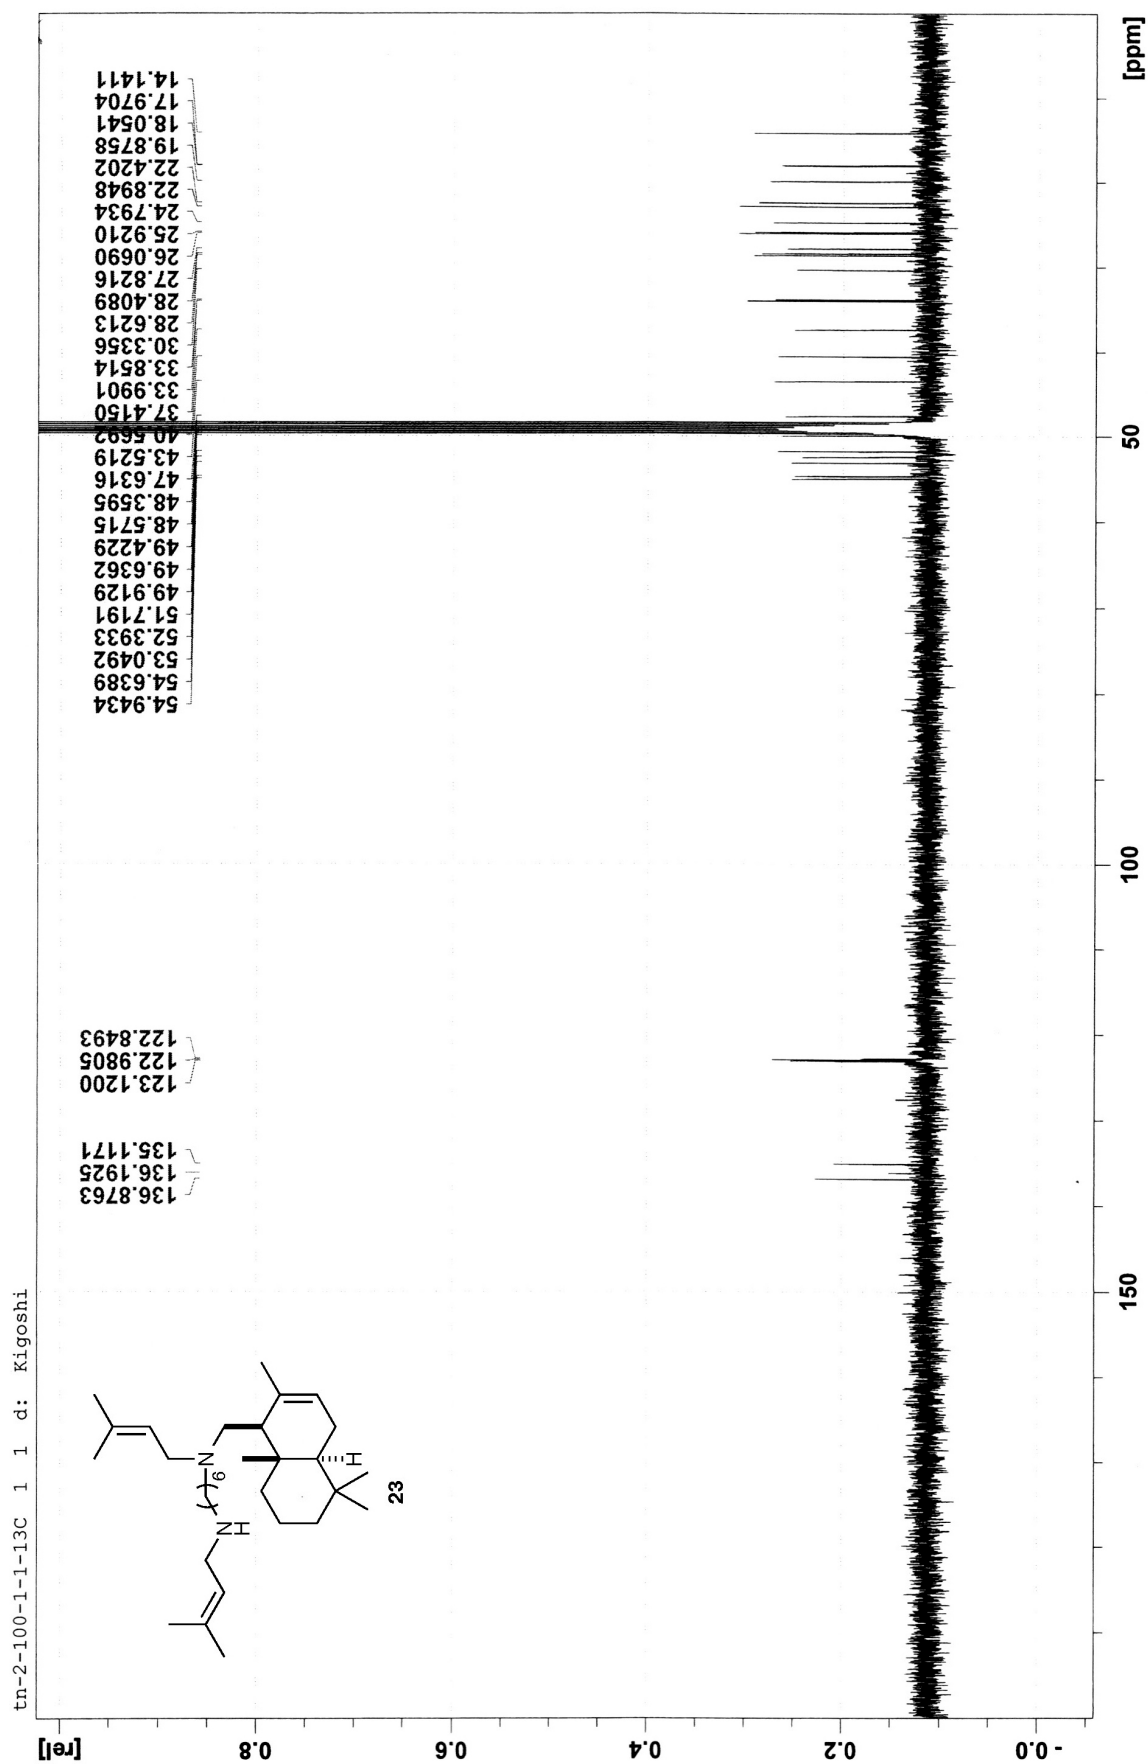

$^{13}\text{C}$  NMR spectra of **23** (100 MHz,  $\text{CD}_3\text{OD}$ )





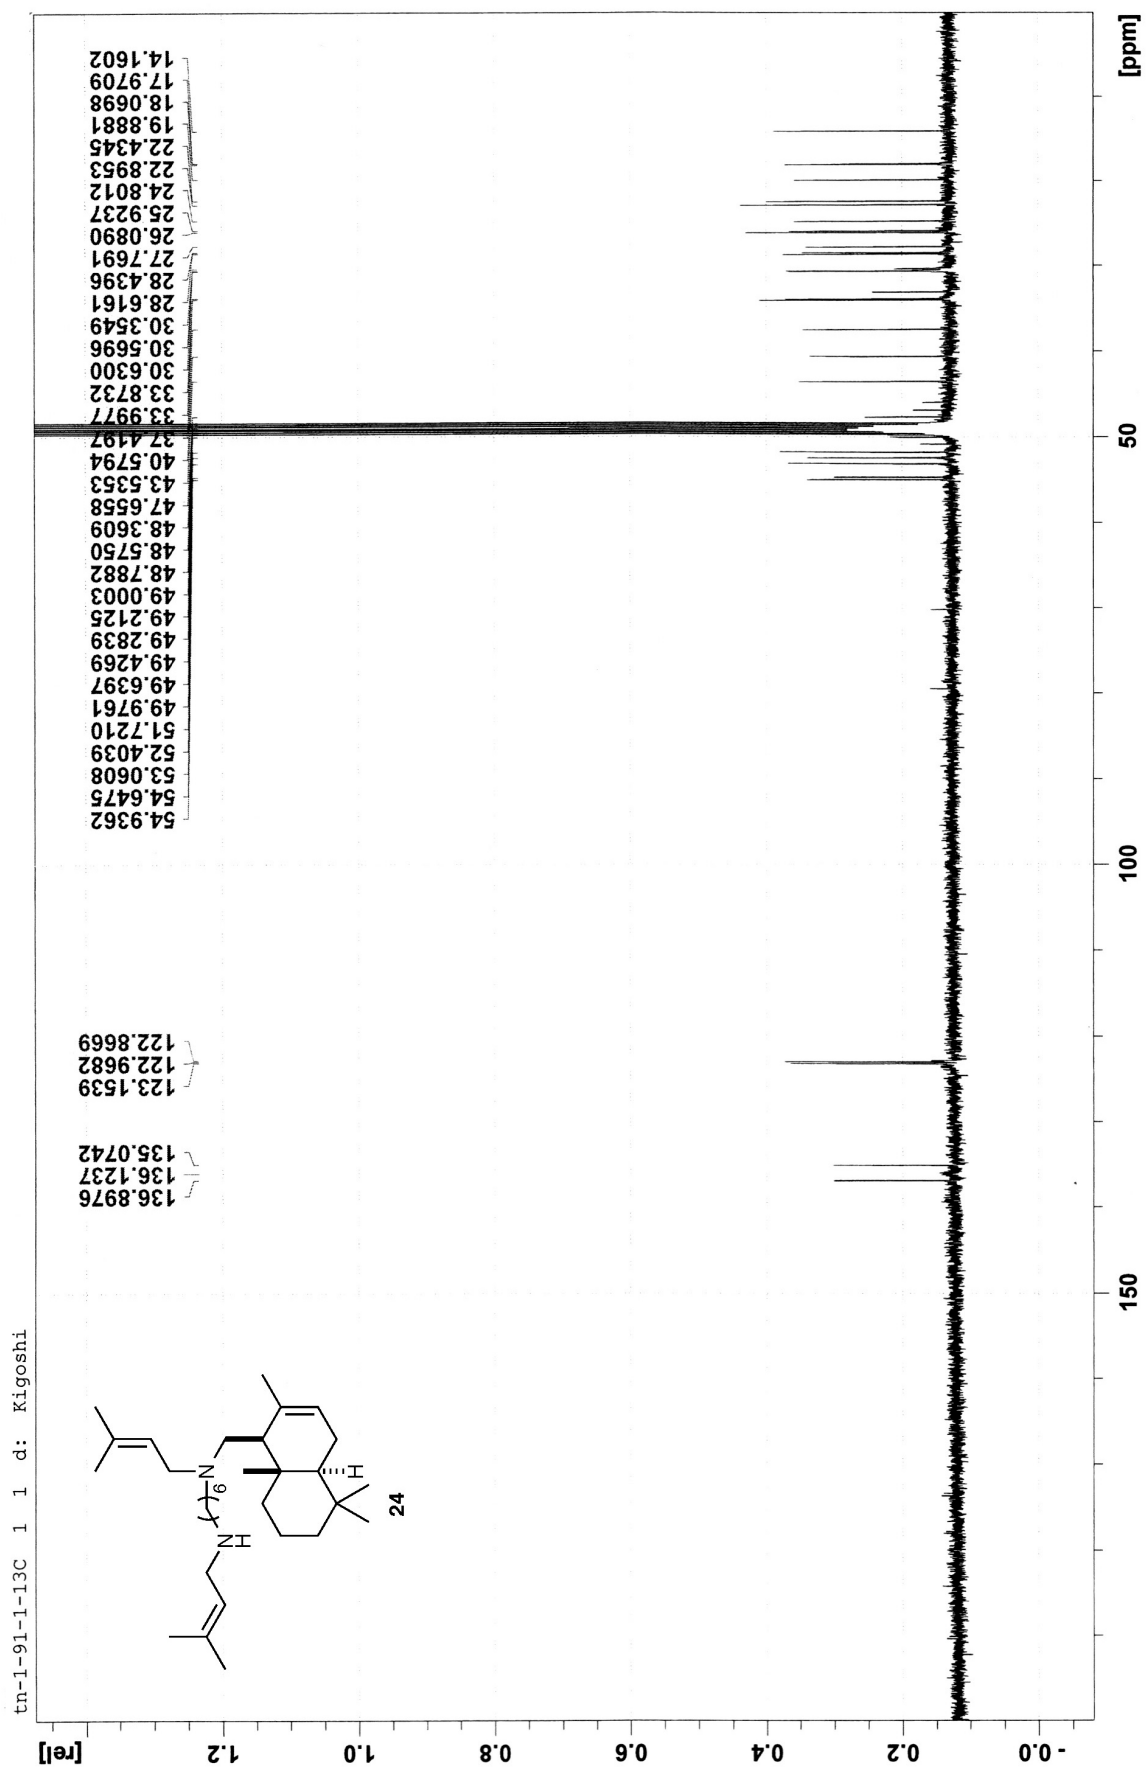

<sup>13</sup>C NMR spectra of **24** (100 MHz, CD<sub>3</sub>OD)

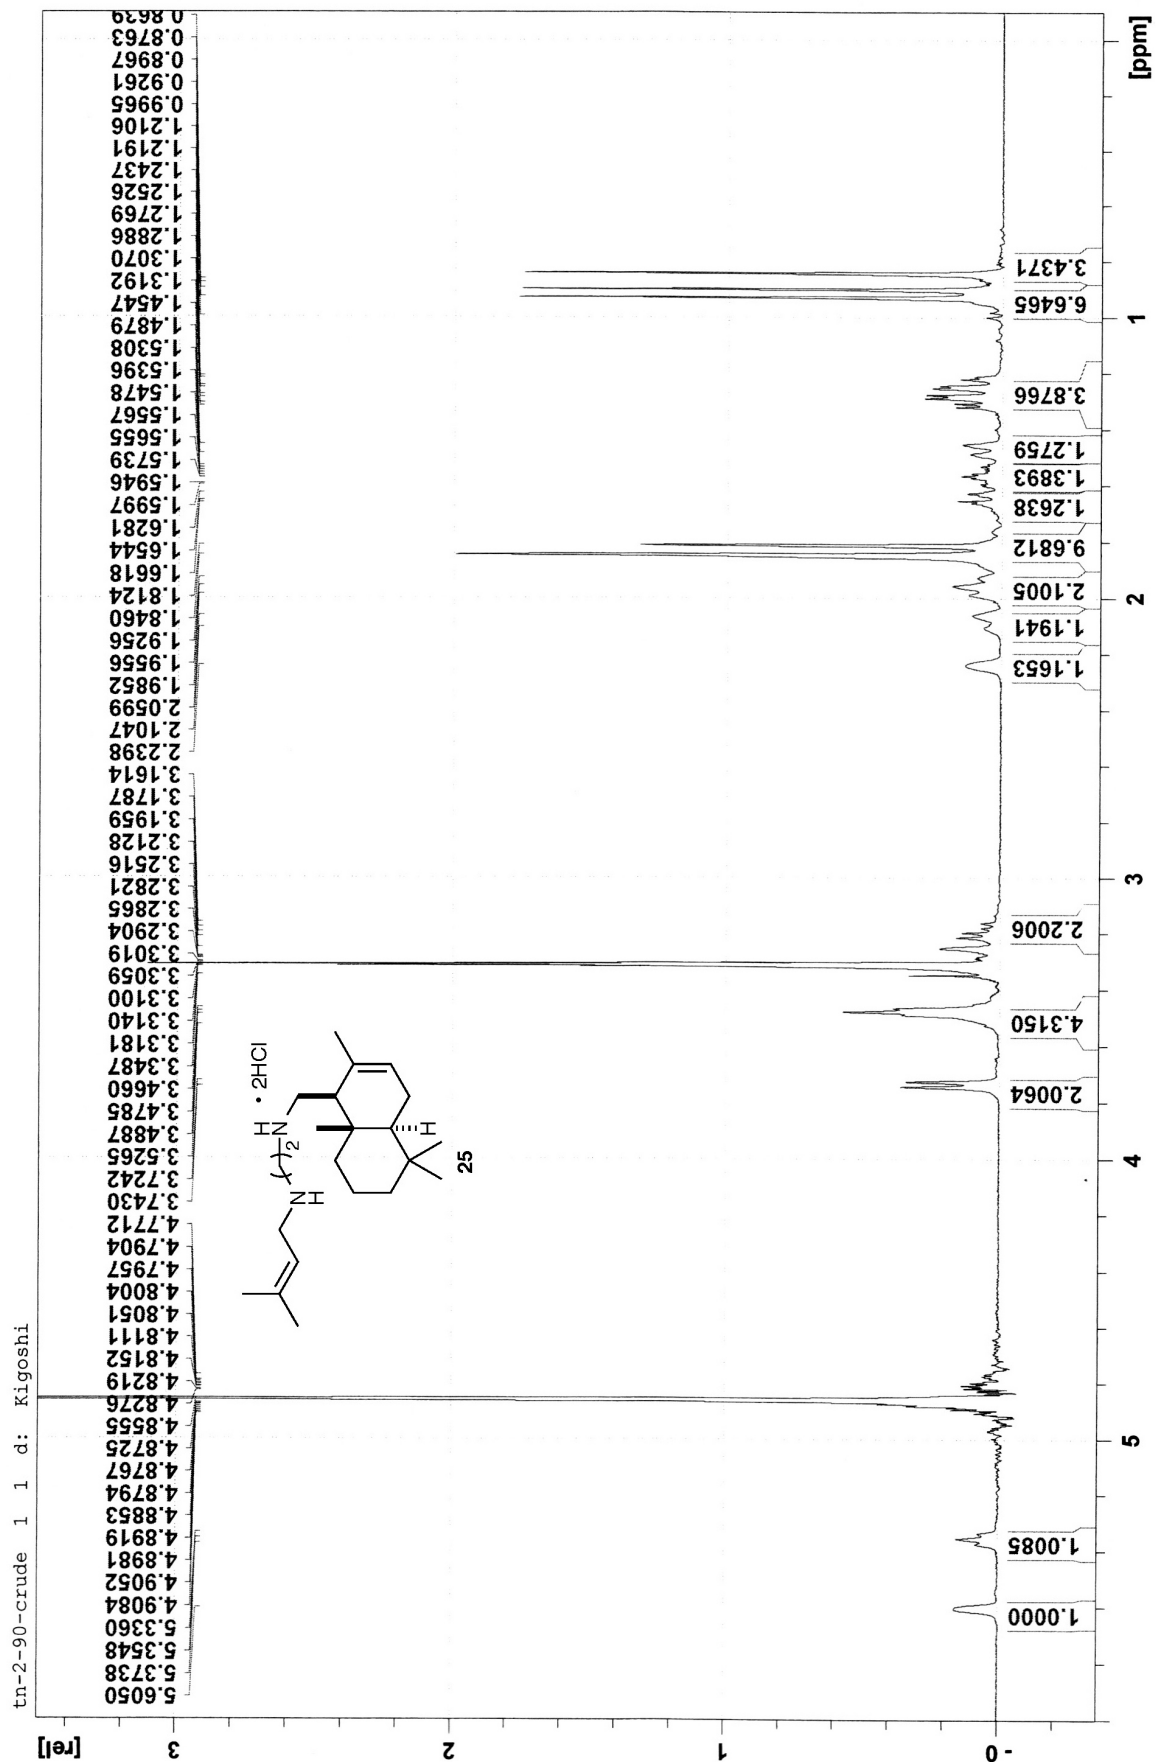

$^1\text{H}$  NMR spectra of **25** (400 MHz,  $\text{CD}_3\text{OD}$ )

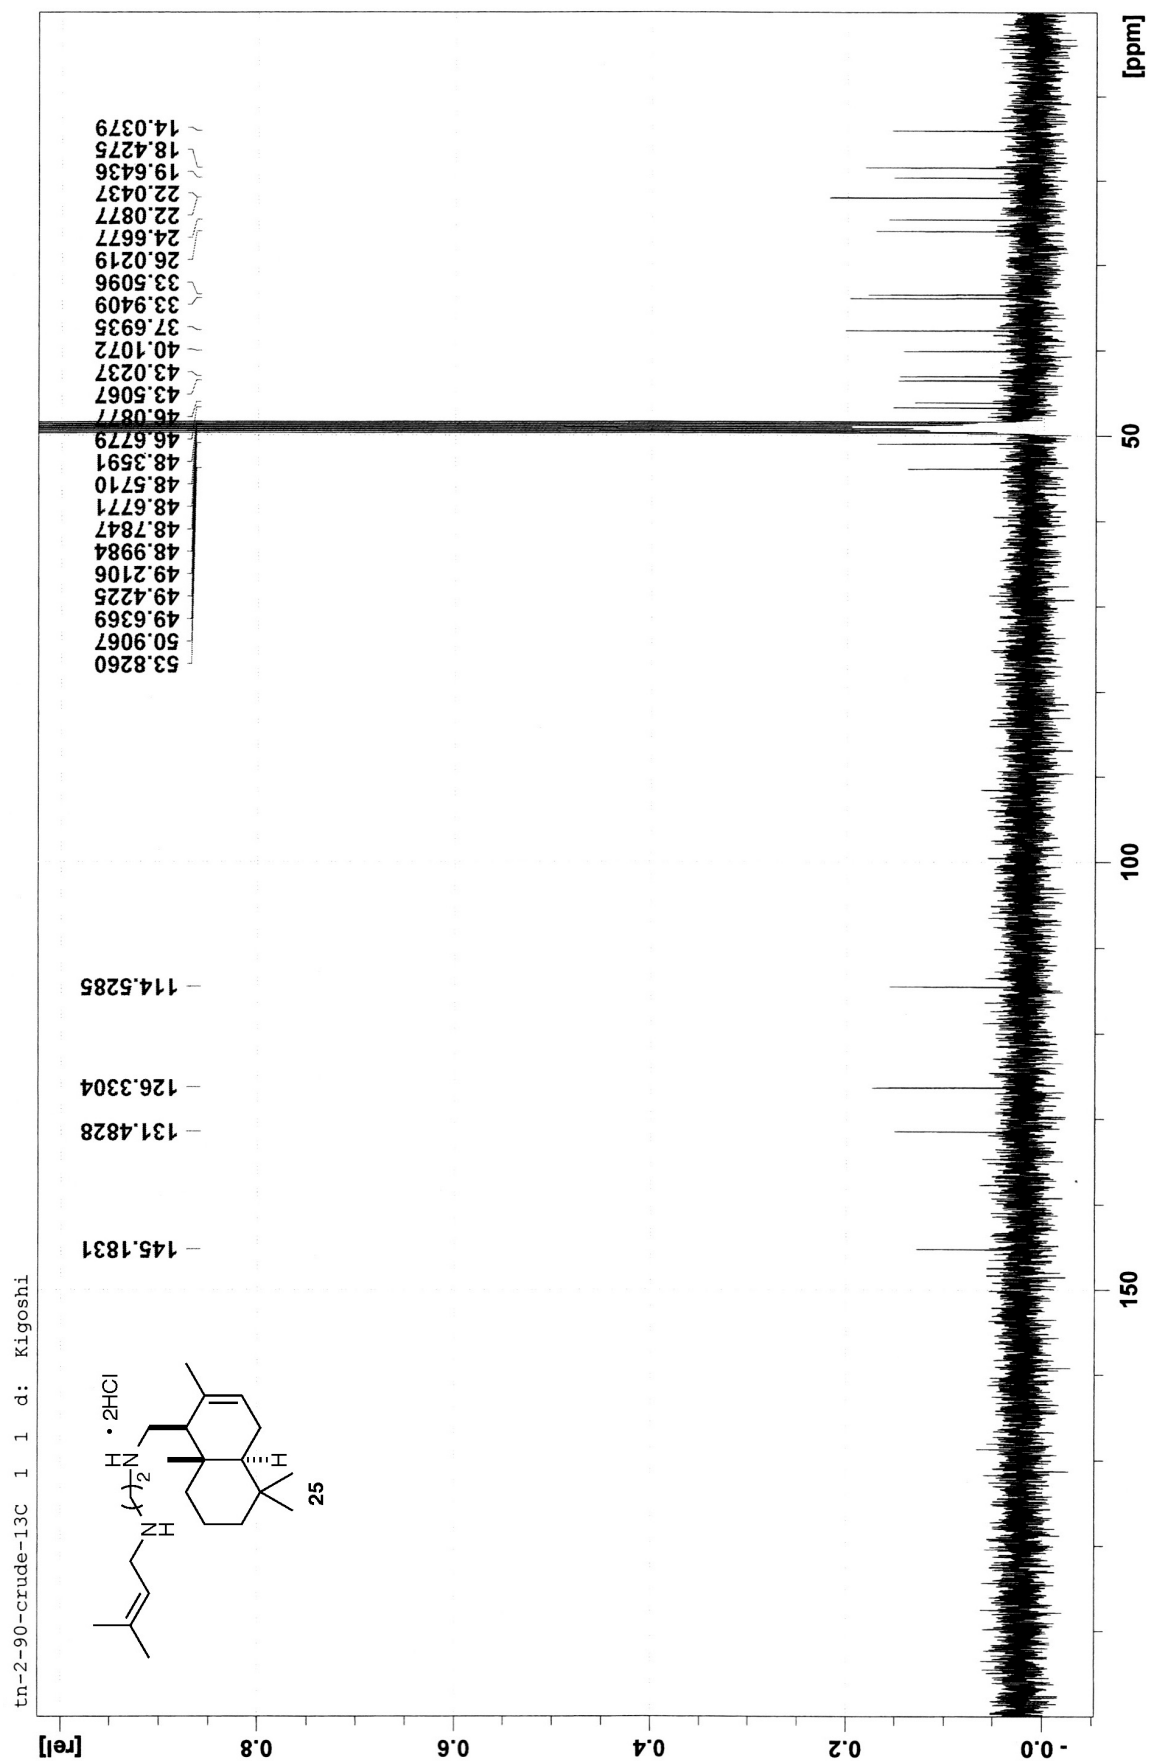

<sup>13</sup>C NMR spectra of **25** (100 MHz, CD<sub>3</sub>OD)

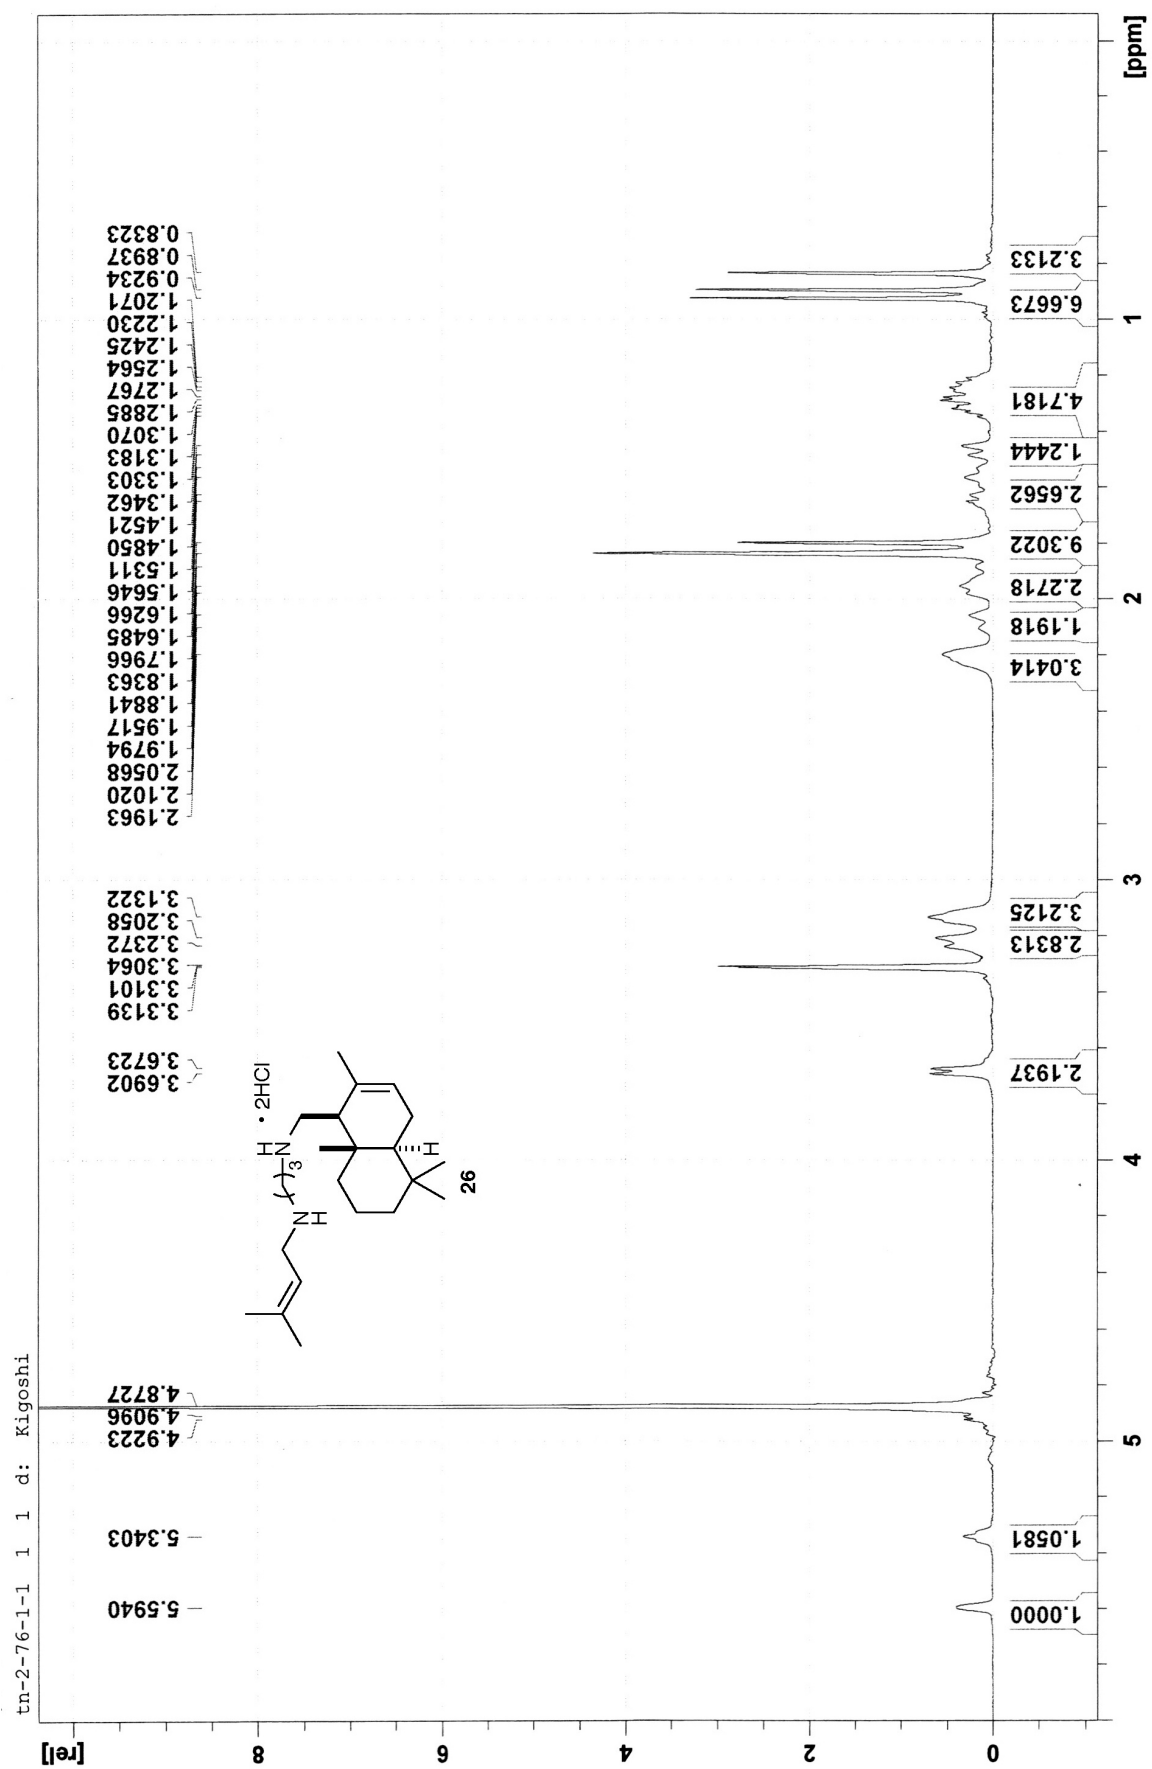

<sup>1</sup>H NMR spectra of **26** (400 MHz, CD<sub>3</sub>OD)

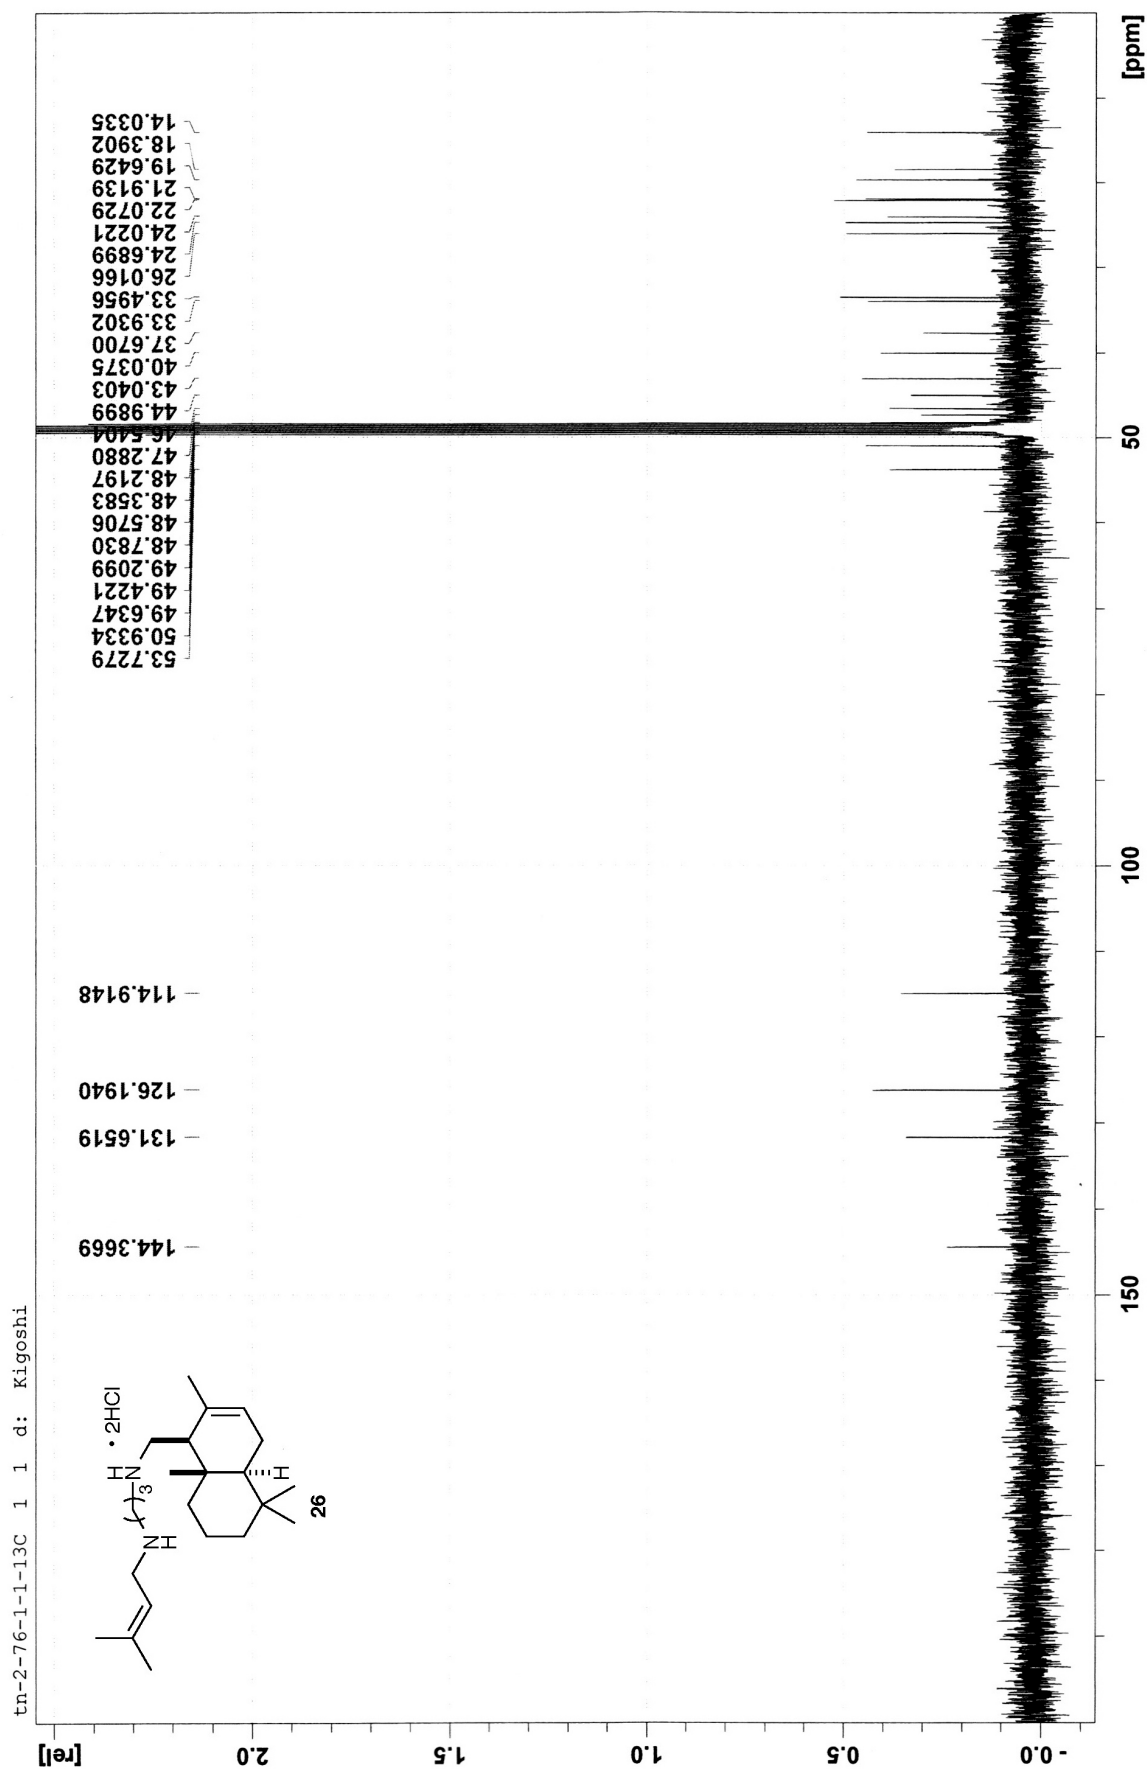

$^{13}\text{C}$  NMR spectra of **26** (100 MHz,  $\text{CD}_3\text{OD}$ )

tn-2-77-crude 10 1 D:\kigoshi Kigoshi

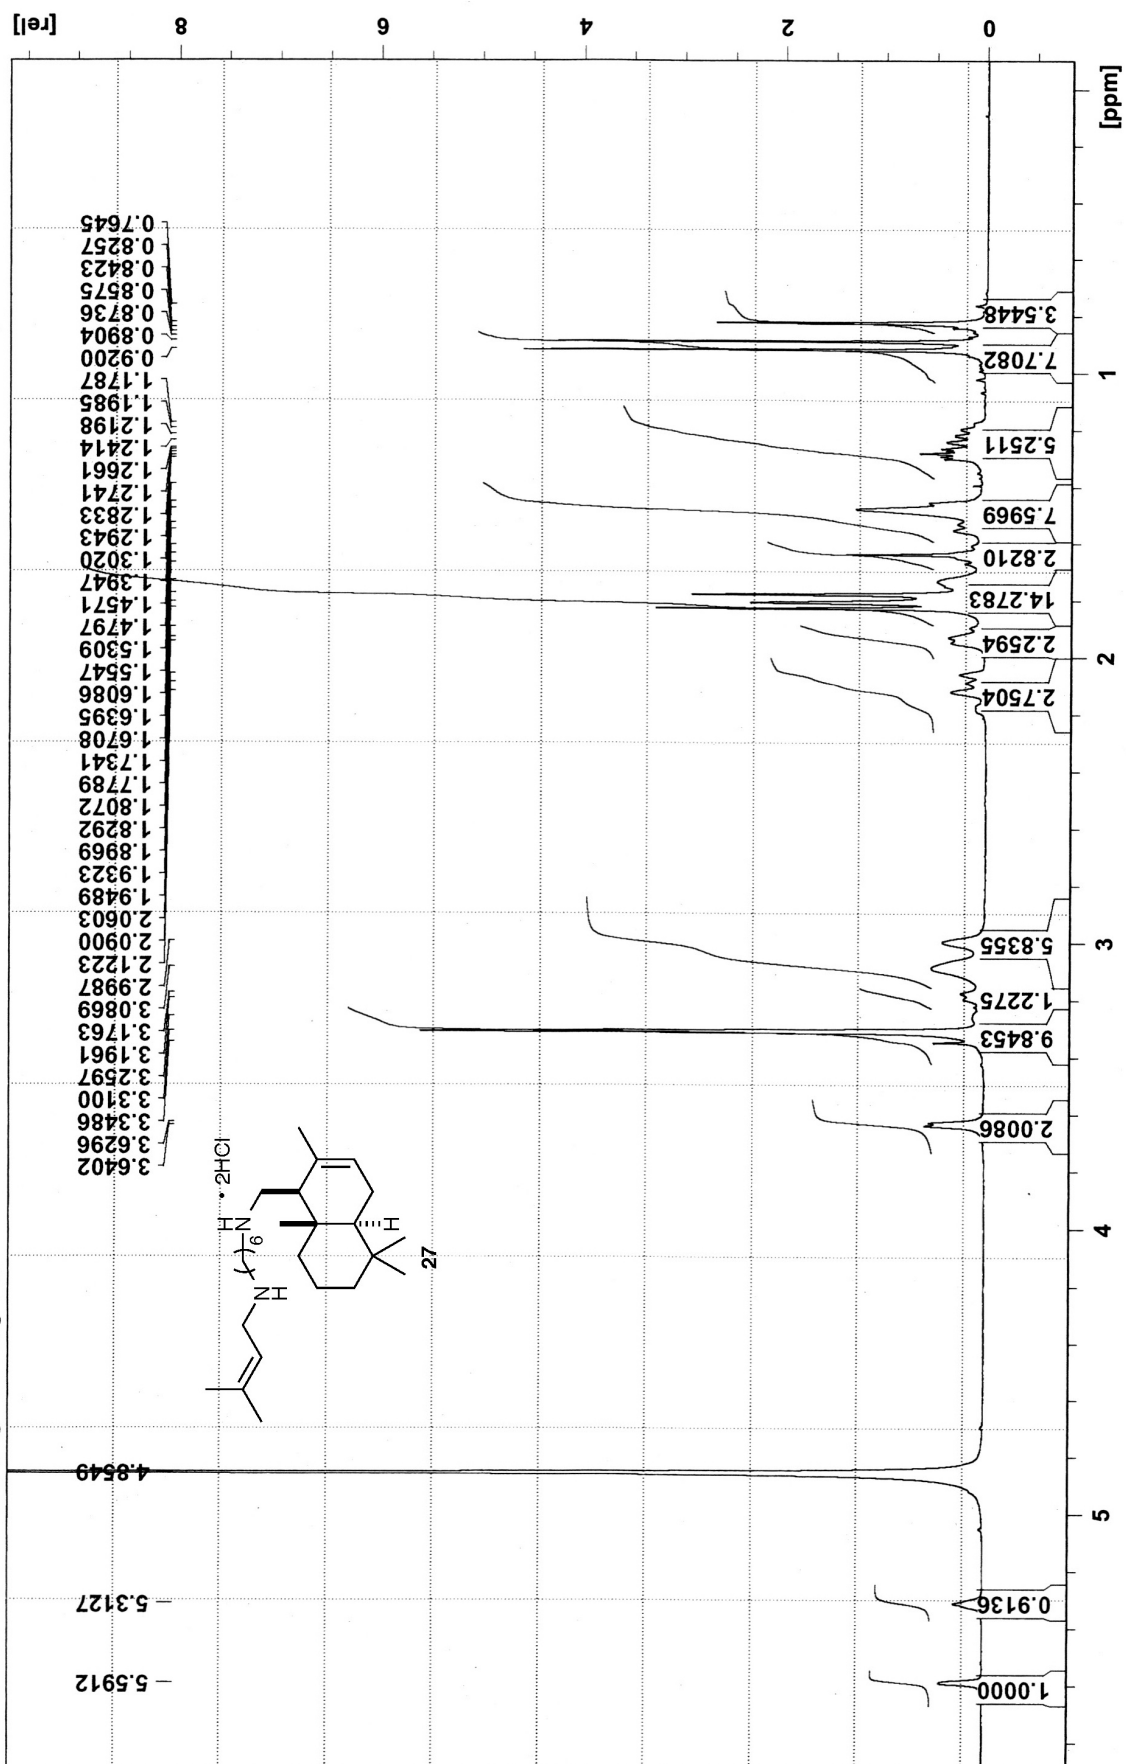

<sup>1</sup>H NMR spectra of **27** (600 MHz, CD<sub>3</sub>OD)

tn-2-77-crude-13C 10 1 D:\kigoshi Kigoshi

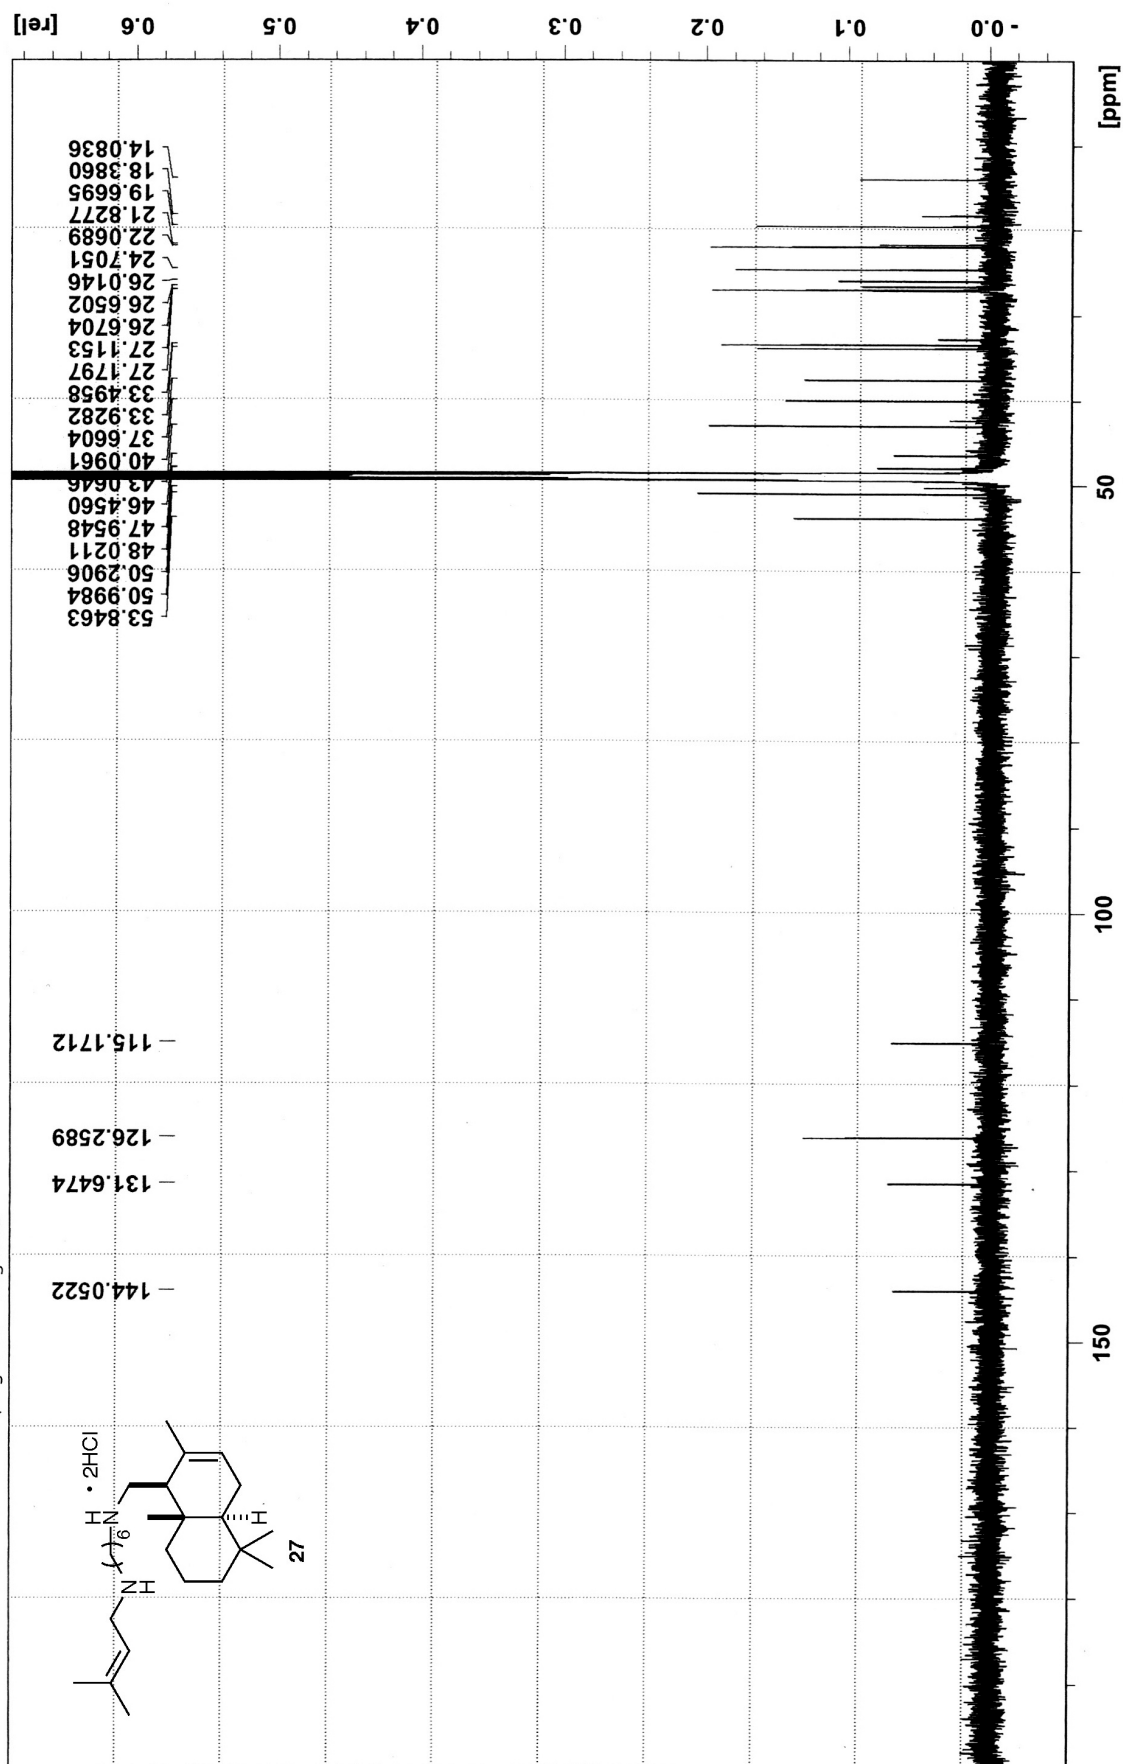

<sup>13</sup>C NMR spectra of **27** (150 MHz, CD<sub>3</sub>OD)

tn-2-88-crude 10 1 D:\kigoshi Kigoshi

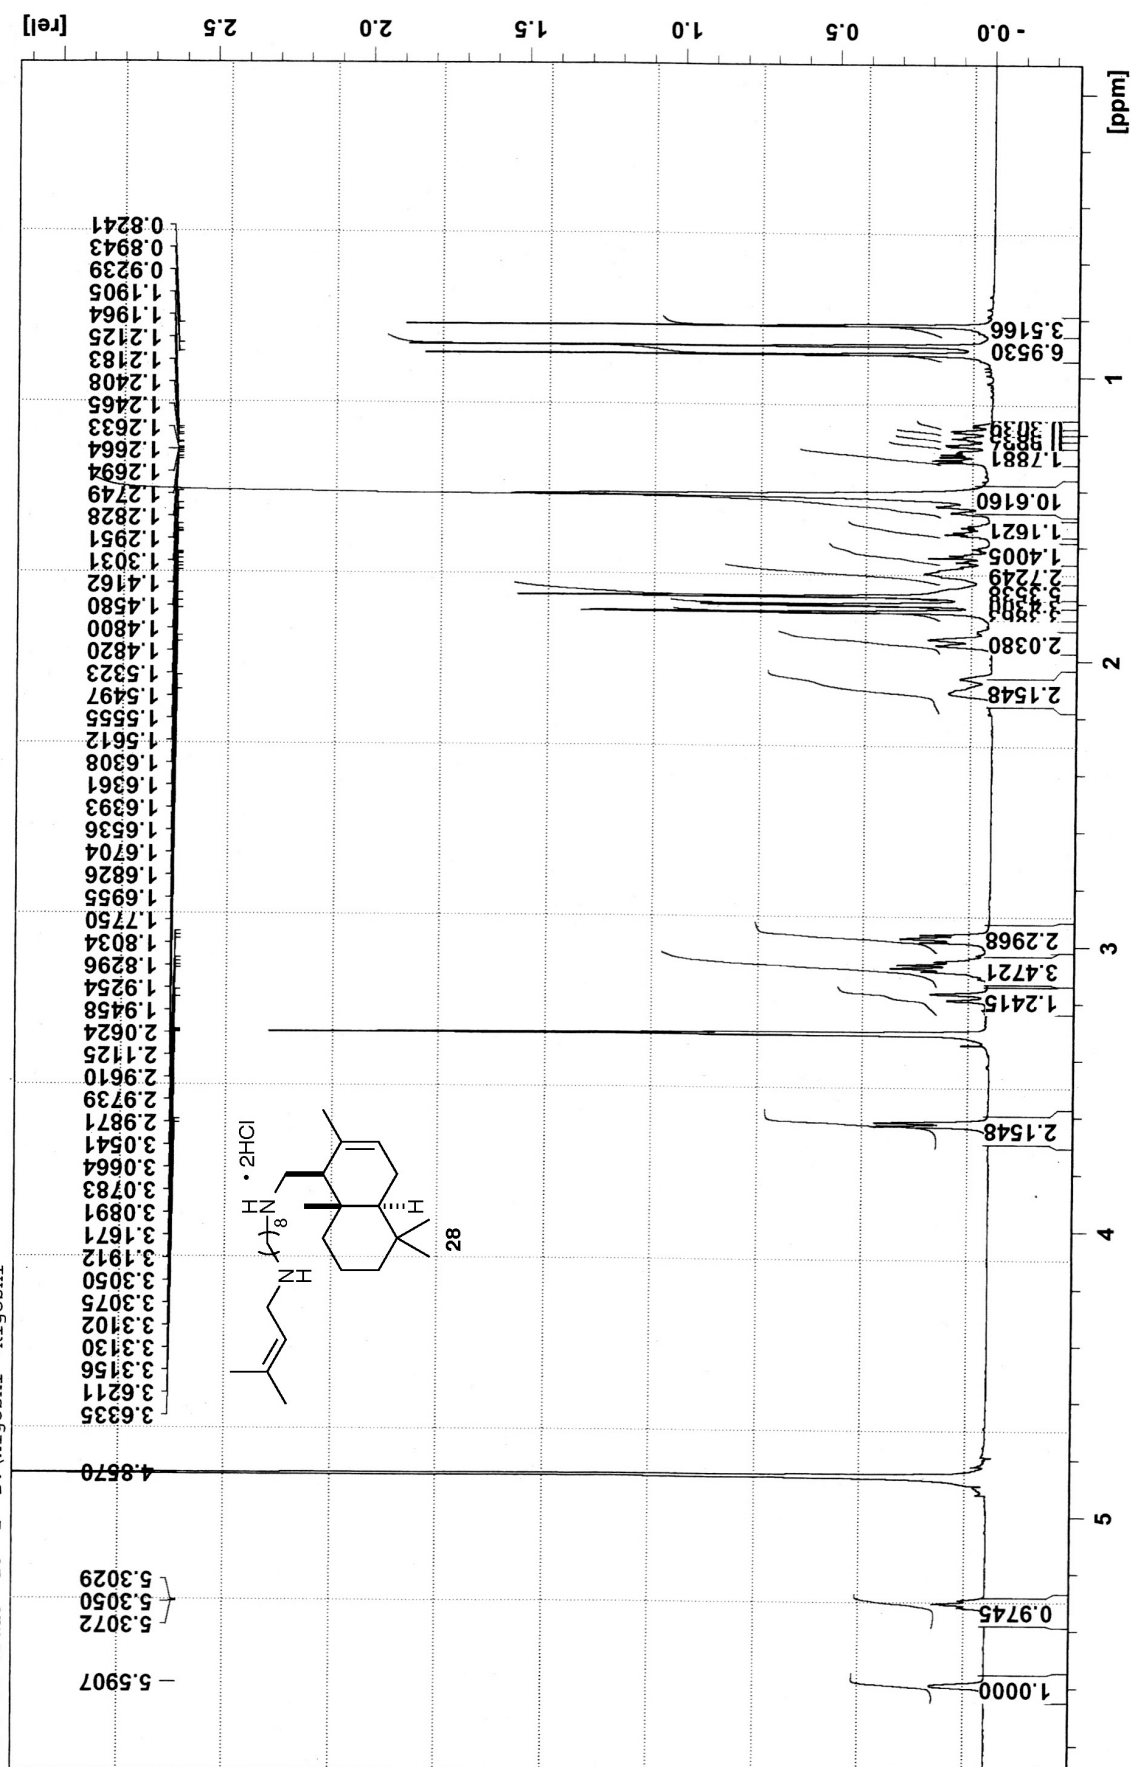

$^1\text{H}$  NMR spectra of **28** (600 MHz,  $\text{CD}_3\text{OD}$ )



tn-2-88-crude-13C 10 1 D:\kigoshi Kigoshi

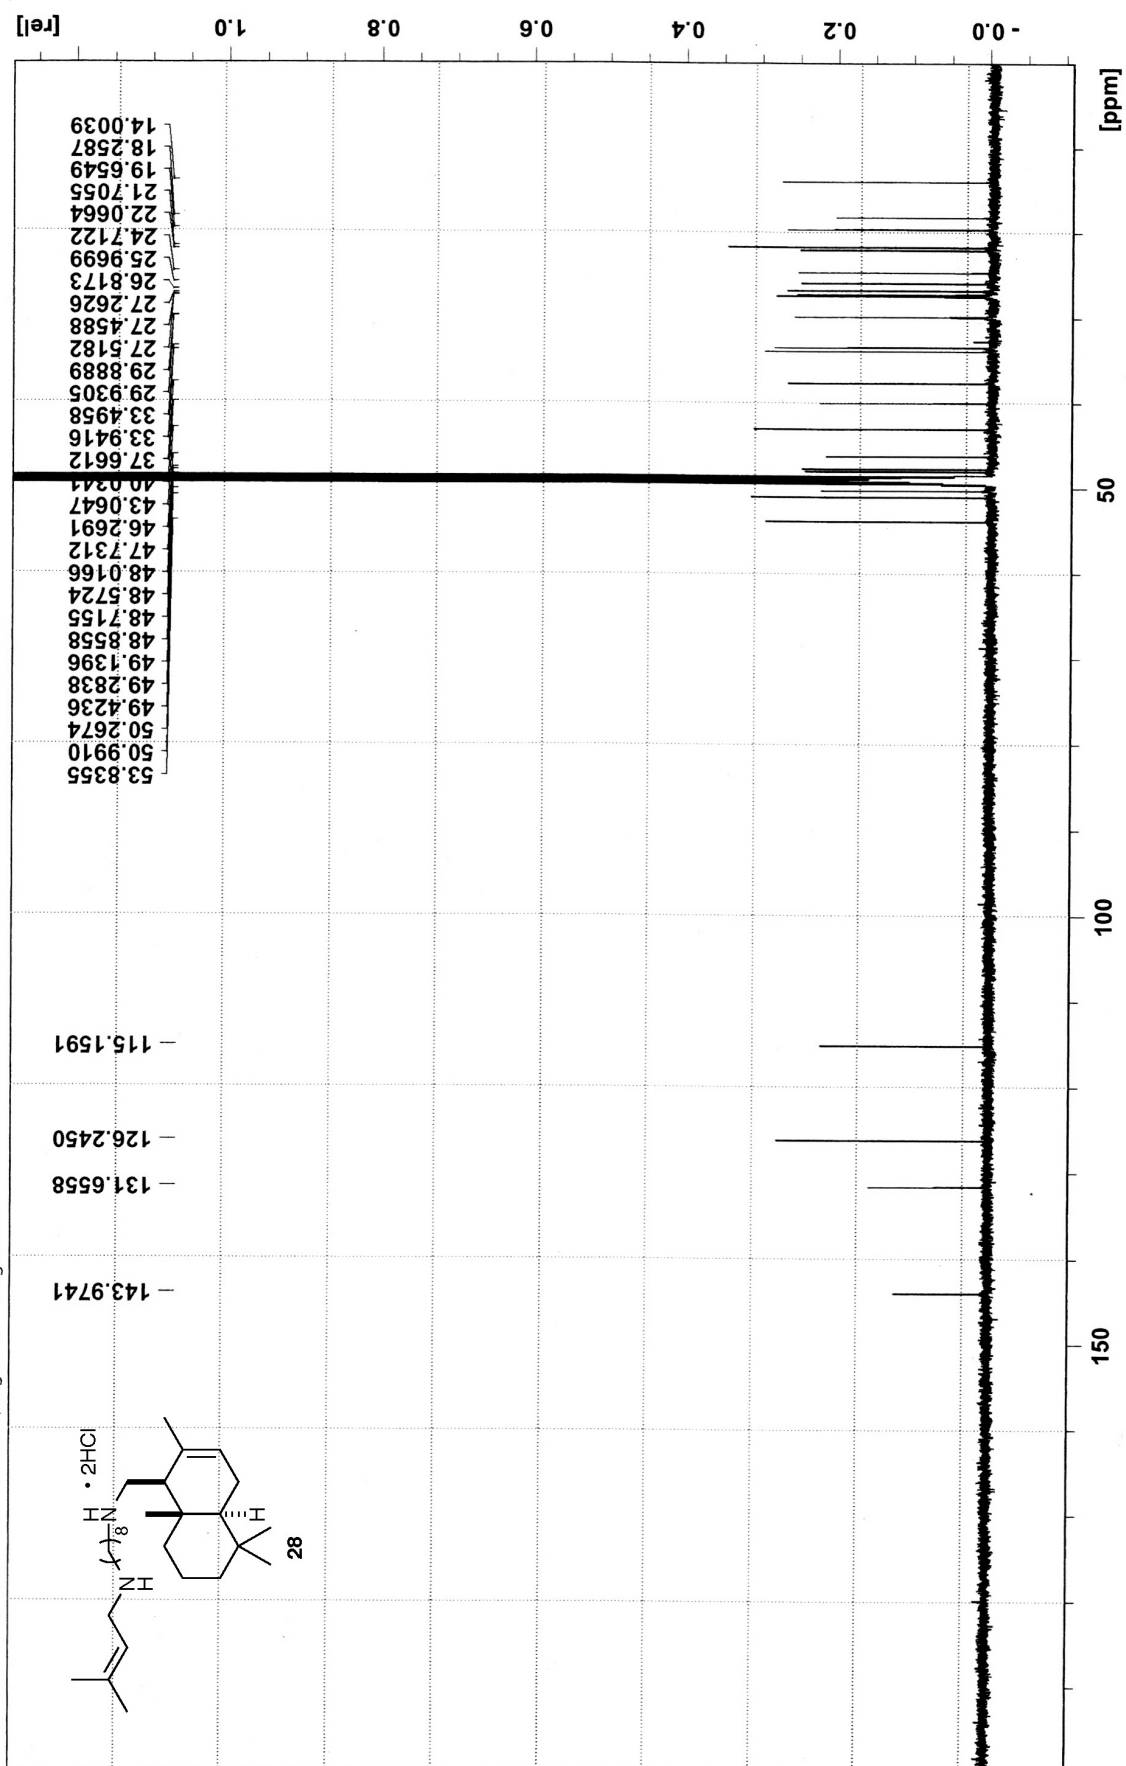

<sup>13</sup>C NMR spectra of **28** (150 MHz, CD<sub>3</sub>OD)
